# Supplementary material
Source: Royal Society of Chemistry journal article supplement (doi:10.1039/d5cp04363h)
Supplement: d5cp04363h2.xlsx [file d5cp04363h2.xlsx]

## Sheet: smiles_and_NHCs
Structure	SMILES
0	Brc1ccc(N2[C]N(c3ccc(Br)cc3)C(Cc3ccccc3)=C2Cc2ccccc2)cc1
1	Brc1ccc(N2[C]N(c3ccc(Br)cc3)C(Cc3ccccc3)=N2)cc1
2	Brc1ccc(N2[C]N(c3ccc(Br)cc3)C(c3ccccc3)=C2c2ccccc2)cc1
3	Brc1ccc(N2[C]N(c3ccc(Br)cc3)C(c3ccccc3)=N2)cc1
4	Brc1ccc(N2[C]N(c3ccc(Br)cc3)C=C2)cc1
5	Brc1ccc(N2[C]N(c3ccc(Br)cc3)CC2)cc1
6	Brc1ccc(N2[C]N(c3ccc(Br)cc3)N=C2)cc1
7	Brc1ccc(N2[C]N(c3ccc(Br)cc3)N=N2)cc1
8	Brc1ccc(N2[C]N(c3ccc(Br)cc3)[C@@H](Cc3ccccc3)[C@@H]2Cc2ccccc2)cc1
9	Brc1ccc(N2[C]N(c3ccc(Br)cc3)[C@@H](c3ccccc3)[C@@H]2c2ccccc2)cc1
10	Brc1ccc(N2[C]N(c3ccc(Br)cc3)[C@@H]3CCCC[C@H]32)cc1
11	Brc1ccc(N2[C]N(c3ccc(Br)cc3)c3ccccc32)cc1
12	Brc1ccc(N2[C]N3C(=C2)CO[C@H]2Cc4ccccc4[C@H]23)cc1
13	Brc1ccc(N2[C]N3C(=C2Cc2ccccc2)CO[C@H]2Cc4ccccc4[C@H]23)cc1
14	Brc1ccc(N2[C]N3C(=C2c2ccccc2)CO[C@H]2Cc4ccccc4[C@H]23)cc1
15	Brc1ccc(N2[C]N3C(=N2)CC[C@H]3C(c2ccccc2)c2ccccc2)cc1
16	Brc1ccc(N2[C]N3C(=N2)CC[C@H]3C2CCCCC2)cc1
17	Brc1ccc(N2[C]N3C(=N2)CC[C@H]3COc2ccccc2)cc1
18	Brc1ccc(N2[C]N3C(=N2)CC[C@H]3Cc2ccccc2)cc1
19	Brc1ccc(N2[C]N3C(=N2)CC[C@H]3c2ccccc2)cc1
20	Brc1ccc(N2[C]N3C(=N2)COC[C@@H]3C(c2ccccc2)c2ccccc2)cc1
21	Brc1ccc(N2[C]N3C(=N2)COC[C@@H]3C2CCCCC2)cc1
22	Brc1ccc(N2[C]N3C(=N2)COC[C@@H]3COc2ccccc2)cc1
23	Brc1ccc(N2[C]N3C(=N2)COC[C@@H]3Cc2ccccc2)cc1
24	Brc1ccc(N2[C]N3C(=N2)COC[C@@H]3c2ccccc2)cc1
25	Brc1ccc(N2[C]N3C(=N2)CO[C@H]2Cc4ccccc4[C@H]23)cc1
26	Brc1ccc(N2[C]N3C(=N2)C[C@@H]2CCc4ccccc4[C@@H]23)cc1
27	Brc1ccc(N2[C]N3C(=N2)OC[C@@H]3C(c2ccccc2)c2ccccc2)cc1
28	Brc1ccc(N2[C]N3C(=N2)OC[C@@H]3C2CCCCC2)cc1
29	Brc1ccc(N2[C]N3C(=N2)OC[C@@H]3COc2ccccc2)cc1
30	Brc1ccc(N2[C]N3C(=N2)OC[C@@H]3Cc2ccccc2)cc1
31	Brc1ccc(N2[C]N3C(=N2)OC[C@@H]3c2ccccc2)cc1
32	Brc1ccc(N2[C]N3C(=N2)[C@H](Cc2ccccc2)C[C@H]3C(c2ccccc2)c2ccccc2)cc1
33	Brc1ccc(N2[C]N3C(=N2)[C@H](Cc2ccccc2)C[C@H]3C2CCCCC2)cc1
34	Brc1ccc(N2[C]N3C(=N2)[C@H](Cc2ccccc2)C[C@H]3COc2ccccc2)cc1
35	Brc1ccc(N2[C]N3C(=N2)[C@H](Cc2ccccc2)C[C@H]3Cc2ccccc2)cc1
36	Brc1ccc(N2[C]N3C(=N2)[C@H](Cc2ccccc2)C[C@H]3c2ccccc2)cc1
37	Brc1ccc(N2[C]N3C(=N2)[C@H](c2ccccc2)C[C@H]3C(c2ccccc2)c2ccccc2)cc1
38	Brc1ccc(N2[C]N3C(=N2)[C@H](c2ccccc2)C[C@H]3C2CCCCC2)cc1
39	Brc1ccc(N2[C]N3C(=N2)[C@H](c2ccccc2)C[C@H]3COc2ccccc2)cc1
40	Brc1ccc(N2[C]N3C(=N2)[C@H](c2ccccc2)C[C@H]3Cc2ccccc2)cc1
41	Brc1ccc(N2[C]N3C(=N2)[C@H](c2ccccc2)C[C@H]3c2ccccc2)cc1
42	Brc1ccc(N2[C]N3C=CC=CC3=N2)cc1
43	Brc1ccc(N2[C]N3CCCC3=N2)cc1
44	Brc1ccc(N2[C]N3CCOC3=N2)cc1
45	Brc1ccc(N2[C]N3CCOCC3=N2)cc1
46	Brc1ccc(N2[C]N3CC[C@@H](Cc4ccccc4)C3=N2)cc1
47	Brc1ccc(N2[C]N3CC[C@@H](c4ccccc4)C3=N2)cc1
48	Brc1ccc(N2[C]OC(Cc3ccccc3)=N2)cc1
49	Brc1ccc(N2[C]OC(c3ccccc3)=N2)cc1
50	Brc1ccc(N2[C]OC=N2)cc1
51	Brc1ccc(N2[C]SC(Cc3ccccc3)=C2Cc2ccccc2)cc1
52	Brc1ccc(N2[C]SC(c3ccccc3)=C2c2ccccc2)cc1
53	Brc1ccc(N2[C]SC=C2)cc1
54	CC(C)(C)[C@@H]1CCC2=NN(C3CCCCC3)[C]N21
55	CC(C)(C)[C@@H]1CCC2=NN(Cc3ccccc3)[C]N21
56	CC(C)(C)[C@@H]1CCC2=NN(Cc3ccccn3)[C]N21
57	CC(C)(C)[C@@H]1CCC2=NN(c3c(Cl)cc(Cl)cc3Cl)[C]N21
58	CC(C)(C)[C@@H]1CCC2=NN(c3c(F)c(F)c(F)c(F)c3F)[C]N21
59	CC(C)(C)[C@@H]1CCC2=NN(c3c(F)cccc3F)[C]N21
60	CC(C)(C)[C@@H]1CCC2=NN(c3cc(C(F)(F)F)cc(C(F)(F)F)c3)[C]N21
61	CC(C)(C)[C@@H]1CCC2=NN(c3cc(Cl)cc(Cl)c3)[C]N21
62	CC(C)(C)[C@@H]1CCC2=NN(c3cc(F)c(F)c(F)c3)[C]N21
63	CC(C)(C)[C@@H]1CCC2=NN(c3cc(F)cc(F)c3)[C]N21
64	CC(C)(C)[C@@H]1CCC2=NN(c3cc([N+](=O)[O-])cc([N+](=O)[O-])c3)[C]N21
65	CC(C)(C)[C@@H]1CCC2=NN(c3ccc(Br)cc3)[C]N21
66	CC(C)(C)[C@@H]1CCC2=NN(c3ccc(C#N)cc3)[C]N21
67	CC(C)(C)[C@@H]1CCC2=NN(c3ccc(C(F)(F)F)cc3)[C]N21
68	CC(C)(C)[C@@H]1CCC2=NN(c3ccc(Cl)cc3)[C]N21
69	CC(C)(C)[C@@H]1CCC2=NN(c3ccc(F)cc3)[C]N21
70	CC(C)(C)[C@@H]1CCC2=NN(c3ccc(O)cc3)[C]N21
71	CC(C)(C)[C@@H]1CCC2=NN(c3ccc([N+](=O)[O-])cc3)[C]N21
72	CC(C)(C)[C@@H]1CCC2=NN(c3ccccc3)[C]N21
73	CC(C)(C)[C@@H]1C[C@@H](C#N)C2=NN(C3CCCCC3)[C]N21
74	CC(C)(C)[C@@H]1C[C@@H](C#N)C2=NN(Cc3ccccc3)[C]N21
75	CC(C)(C)[C@@H]1C[C@@H](C#N)C2=NN(Cc3ccccn3)[C]N21
76	CC(C)(C)[C@@H]1C[C@@H](C#N)C2=NN(c3c(Cl)cc(Cl)cc3Cl)[C]N21
77	CC(C)(C)[C@@H]1C[C@@H](C#N)C2=NN(c3c(F)c(F)c(F)c(F)c3F)[C]N21
78	CC(C)(C)[C@@H]1C[C@@H](C#N)C2=NN(c3c(F)cccc3F)[C]N21
79	CC(C)(C)[C@@H]1C[C@@H](C#N)C2=NN(c3cc(C(F)(F)F)cc(C(F)(F)F)c3)[C]N21
80	CC(C)(C)[C@@H]1C[C@@H](C#N)C2=NN(c3cc(Cl)cc(Cl)c3)[C]N21
81	CC(C)(C)[C@@H]1C[C@@H](C#N)C2=NN(c3cc(F)c(F)c(F)c3)[C]N21
82	CC(C)(C)[C@@H]1C[C@@H](C#N)C2=NN(c3cc(F)cc(F)c3)[C]N21
83	CC(C)(C)[C@@H]1C[C@@H](C#N)C2=NN(c3cc([N+](=O)[O-])cc([N+](=O)[O-])c3)[C]N21
84	CC(C)(C)[C@@H]1C[C@@H](C#N)C2=NN(c3ccc(Br)cc3)[C]N21
86	CC(C)(C)[C@@H]1C[C@@H](C#N)C2=NN(c3ccc(C(F)(F)F)cc3)[C]N21
87	CC(C)(C)[C@@H]1C[C@@H](C#N)C2=NN(c3ccc(Cl)cc3)[C]N21
88	CC(C)(C)[C@@H]1C[C@@H](C#N)C2=NN(c3ccc(F)cc3)[C]N21
89	CC(C)(C)[C@@H]1C[C@@H](C#N)C2=NN(c3ccc(O)cc3)[C]N21
90	CC(C)(C)[C@@H]1C[C@@H](C#N)C2=NN(c3ccc([N+](=O)[O-])cc3)[C]N21
91	CC(C)(C)[C@@H]1C[C@@H](C#N)C2=NN(c3ccccc3)[C]N21
92	CC(C)(C)[C@@H]1C[C@@H](C(F)(F)F)C2=NN(C3CCCCC3)[C]N21
94	CC(C)(C)[C@@H]1C[C@@H](C(F)(F)F)C2=NN(Cc3ccccn3)[C]N21
95	CC(C)(C)[C@@H]1C[C@@H](C(F)(F)F)C2=NN(c3c(Cl)cc(Cl)cc3Cl)[C]N21
96	CC(C)(C)[C@@H]1C[C@@H](C(F)(F)F)C2=NN(c3c(F)c(F)c(F)c(F)c3F)[C]N21
97	CC(C)(C)[C@@H]1C[C@@H](C(F)(F)F)C2=NN(c3c(F)cccc3F)[C]N21
98	CC(C)(C)[C@@H]1C[C@@H](C(F)(F)F)C2=NN(c3cc(C(F)(F)F)cc(C(F)(F)F)c3)[C]N21
99	CC(C)(C)[C@@H]1C[C@@H](C(F)(F)F)C2=NN(c3cc(Cl)cc(Cl)c3)[C]N21
100	CC(C)(C)[C@@H]1C[C@@H](C(F)(F)F)C2=NN(c3cc(F)c(F)c(F)c3)[C]N21
101	CC(C)(C)[C@@H]1C[C@@H](C(F)(F)F)C2=NN(c3cc(F)cc(F)c3)[C]N21
102	CC(C)(C)[C@@H]1C[C@@H](C(F)(F)F)C2=NN(c3cc([N+](=O)[O-])cc([N+](=O)[O-])c3)[C]N21
103	CC(C)(C)[C@@H]1C[C@@H](C(F)(F)F)C2=NN(c3ccc(Br)cc3)[C]N21
105	CC(C)(C)[C@@H]1C[C@@H](C(F)(F)F)C2=NN(c3ccc(C(F)(F)F)cc3)[C]N21
106	CC(C)(C)[C@@H]1C[C@@H](C(F)(F)F)C2=NN(c3ccc(Cl)cc3)[C]N21
107	CC(C)(C)[C@@H]1C[C@@H](C(F)(F)F)C2=NN(c3ccc(F)cc3)[C]N21
108	CC(C)(C)[C@@H]1C[C@@H](C(F)(F)F)C2=NN(c3ccc(O)cc3)[C]N21
109	CC(C)(C)[C@@H]1C[C@@H](C(F)(F)F)C2=NN(c3ccc([N+](=O)[O-])cc3)[C]N21
110	CC(C)(C)[C@@H]1C[C@@H](C(F)(F)F)C2=NN(c3ccccc3)[C]N21
111	CC(C)(C)[C@@H]1C[C@@H](CCO)C2=NN(C3CCCCC3)[C]N21
112	CC(C)(C)[C@@H]1C[C@@H](CCO)C2=NN(Cc3ccccc3)[C]N21
113	CC(C)(C)[C@@H]1C[C@@H](CCO)C2=NN(Cc3ccccn3)[C]N21
114	CC(C)(C)[C@@H]1C[C@@H](CCO)C2=NN(c3c(Cl)cc(Cl)cc3Cl)[C]N21
115	CC(C)(C)[C@@H]1C[C@@H](CCO)C2=NN(c3c(F)c(F)c(F)c(F)c3F)[C]N21
116	CC(C)(C)[C@@H]1C[C@@H](CCO)C2=NN(c3c(F)cccc3F)[C]N21
117	CC(C)(C)[C@@H]1C[C@@H](CCO)C2=NN(c3cc(C(F)(F)F)cc(C(F)(F)F)c3)[C]N21
118	CC(C)(C)[C@@H]1C[C@@H](CCO)C2=NN(c3cc(Cl)cc(Cl)c3)[C]N21
119	CC(C)(C)[C@@H]1C[C@@H](CCO)C2=NN(c3cc(F)c(F)c(F)c3)[C]N21
120	CC(C)(C)[C@@H]1C[C@@H](CCO)C2=NN(c3cc(F)cc(F)c3)[C]N21
121	CC(C)(C)[C@@H]1C[C@@H](CCO)C2=NN(c3cc([N+](=O)[O-])cc([N+](=O)[O-])c3)[C]N21
122	CC(C)(C)[C@@H]1C[C@@H](CCO)C2=NN(c3ccc(Br)cc3)[C]N21
123	CC(C)(C)[C@@H]1C[C@@H](CCO)C2=NN(c3ccc(C#N)cc3)[C]N21
124	CC(C)(C)[C@@H]1C[C@@H](CCO)C2=NN(c3ccc(C(F)(F)F)cc3)[C]N21
125	CC(C)(C)[C@@H]1C[C@@H](CCO)C2=NN(c3ccc(Cl)cc3)[C]N21
126	CC(C)(C)[C@@H]1C[C@@H](CCO)C2=NN(c3ccc(F)cc3)[C]N21
127	CC(C)(C)[C@@H]1C[C@@H](CCO)C2=NN(c3ccc(O)cc3)[C]N21
128	CC(C)(C)[C@@H]1C[C@@H](CCO)C2=NN(c3ccc([N+](=O)[O-])cc3)[C]N21
129	CC(C)(C)[C@@H]1C[C@@H](CCO)C2=NN(c3ccccc3)[C]N21
130	CC(C)(C)[C@@H]1C[C@@H](Cc2ccccc2)C2=NN(C3CCCCC3)[C]N21
131	CC(C)(C)[C@@H]1C[C@@H](Cc2ccccc2)C2=NN(Cc3ccccc3)[C]N21
132	CC(C)(C)[C@@H]1C[C@@H](Cc2ccccc2)C2=NN(Cc3ccccn3)[C]N21
133	CC(C)(C)[C@@H]1C[C@@H](Cc2ccccc2)C2=NN(c3c(Cl)cc(Cl)cc3Cl)[C]N21
134	CC(C)(C)[C@@H]1C[C@@H](Cc2ccccc2)C2=NN(c3c(F)c(F)c(F)c(F)c3F)[C]N21
135	CC(C)(C)[C@@H]1C[C@@H](Cc2ccccc2)C2=NN(c3c(F)cccc3F)[C]N21
136	CC(C)(C)[C@@H]1C[C@@H](Cc2ccccc2)C2=NN(c3cc(C(F)(F)F)cc(C(F)(F)F)c3)[C]N21
137	CC(C)(C)[C@@H]1C[C@@H](Cc2ccccc2)C2=NN(c3cc(Cl)cc(Cl)c3)[C]N21
138	CC(C)(C)[C@@H]1C[C@@H](Cc2ccccc2)C2=NN(c3cc(F)c(F)c(F)c3)[C]N21
139	CC(C)(C)[C@@H]1C[C@@H](Cc2ccccc2)C2=NN(c3cc(F)cc(F)c3)[C]N21
140	CC(C)(C)[C@@H]1C[C@@H](Cc2ccccc2)C2=NN(c3cc([N+](=O)[O-])cc([N+](=O)[O-])c3)[C]N21
141	CC(C)(C)[C@@H]1C[C@@H](Cc2ccccc2)C2=NN(c3ccc(Br)cc3)[C]N21
142	CC(C)(C)[C@@H]1C[C@@H](Cc2ccccc2)C2=NN(c3ccc(C#N)cc3)[C]N21
143	CC(C)(C)[C@@H]1C[C@@H](Cc2ccccc2)C2=NN(c3ccc(C(F)(F)F)cc3)[C]N21
144	CC(C)(C)[C@@H]1C[C@@H](Cc2ccccc2)C2=NN(c3ccc(Cl)cc3)[C]N21
145	CC(C)(C)[C@@H]1C[C@@H](Cc2ccccc2)C2=NN(c3ccc(F)cc3)[C]N21
146	CC(C)(C)[C@@H]1C[C@@H](Cc2ccccc2)C2=NN(c3ccc(O)cc3)[C]N21
147	CC(C)(C)[C@@H]1C[C@@H](Cc2ccccc2)C2=NN(c3ccc([N+](=O)[O-])cc3)[C]N21
148	CC(C)(C)[C@@H]1C[C@@H](Cc2ccccc2)C2=NN(c3ccccc3)[C]N21
149	CC(C)(C)[C@@H]1C[C@@H](Cl)C2=NN(C3CCCCC3)[C]N21
150	CC(C)(C)[C@@H]1C[C@@H](Cl)C2=NN(Cc3ccccc3)[C]N21
151	CC(C)(C)[C@@H]1C[C@@H](Cl)C2=NN(Cc3ccccn3)[C]N21
152	CC(C)(C)[C@@H]1C[C@@H](Cl)C2=NN(c3c(Cl)cc(Cl)cc3Cl)[C]N21
153	CC(C)(C)[C@@H]1C[C@@H](Cl)C2=NN(c3c(F)c(F)c(F)c(F)c3F)[C]N21
154	CC(C)(C)[C@@H]1C[C@@H](Cl)C2=NN(c3c(F)cccc3F)[C]N21
155	CC(C)(C)[C@@H]1C[C@@H](Cl)C2=NN(c3cc(C(F)(F)F)cc(C(F)(F)F)c3)[C]N21
156	CC(C)(C)[C@@H]1C[C@@H](Cl)C2=NN(c3cc(Cl)cc(Cl)c3)[C]N21
157	CC(C)(C)[C@@H]1C[C@@H](Cl)C2=NN(c3cc(F)c(F)c(F)c3)[C]N21
158	CC(C)(C)[C@@H]1C[C@@H](Cl)C2=NN(c3cc(F)cc(F)c3)[C]N21
159	CC(C)(C)[C@@H]1C[C@@H](Cl)C2=NN(c3cc([N+](=O)[O-])cc([N+](=O)[O-])c3)[C]N21
160	CC(C)(C)[C@@H]1C[C@@H](Cl)C2=NN(c3ccc(Br)cc3)[C]N21
161	CC(C)(C)[C@@H]1C[C@@H](Cl)C2=NN(c3ccc(C#N)cc3)[C]N21
162	CC(C)(C)[C@@H]1C[C@@H](Cl)C2=NN(c3ccc(C(F)(F)F)cc3)[C]N21
163	CC(C)(C)[C@@H]1C[C@@H](Cl)C2=NN(c3ccc(Cl)cc3)[C]N21
164	CC(C)(C)[C@@H]1C[C@@H](Cl)C2=NN(c3ccc(F)cc3)[C]N21
165	CC(C)(C)[C@@H]1C[C@@H](Cl)C2=NN(c3ccc(O)cc3)[C]N21
166	CC(C)(C)[C@@H]1C[C@@H](Cl)C2=NN(c3ccc([N+](=O)[O-])cc3)[C]N21
167	CC(C)(C)[C@@H]1C[C@@H](Cl)C2=NN(c3ccccc3)[C]N21
168	CC(C)(C)[C@@H]1C[C@@H](F)C2=NN(C3CCCCC3)[C]N21
169	CC(C)(C)[C@@H]1C[C@@H](F)C2=NN(Cc3ccccc3)[C]N21
170	CC(C)(C)[C@@H]1C[C@@H](F)C2=NN(Cc3ccccn3)[C]N21
171	CC(C)(C)[C@@H]1C[C@@H](F)C2=NN(c3c(Cl)cc(Cl)cc3Cl)[C]N21
172	CC(C)(C)[C@@H]1C[C@@H](F)C2=NN(c3c(F)c(F)c(F)c(F)c3F)[C]N21
173	CC(C)(C)[C@@H]1C[C@@H](F)C2=NN(c3c(F)cccc3F)[C]N21
174	CC(C)(C)[C@@H]1C[C@@H](F)C2=NN(c3cc(C(F)(F)F)cc(C(F)(F)F)c3)[C]N21
175	CC(C)(C)[C@@H]1C[C@@H](F)C2=NN(c3cc(Cl)cc(Cl)c3)[C]N21
176	CC(C)(C)[C@@H]1C[C@@H](F)C2=NN(c3cc(F)c(F)c(F)c3)[C]N21
177	CC(C)(C)[C@@H]1C[C@@H](F)C2=NN(c3cc(F)cc(F)c3)[C]N21
178	CC(C)(C)[C@@H]1C[C@@H](F)C2=NN(c3cc([N+](=O)[O-])cc([N+](=O)[O-])c3)[C]N21
179	CC(C)(C)[C@@H]1C[C@@H](F)C2=NN(c3ccc(Br)cc3)[C]N21
180	CC(C)(C)[C@@H]1C[C@@H](F)C2=NN(c3ccc(C#N)cc3)[C]N21
181	CC(C)(C)[C@@H]1C[C@@H](F)C2=NN(c3ccc(C(F)(F)F)cc3)[C]N21
182	CC(C)(C)[C@@H]1C[C@@H](F)C2=NN(c3ccc(Cl)cc3)[C]N21
183	CC(C)(C)[C@@H]1C[C@@H](F)C2=NN(c3ccc(F)cc3)[C]N21
184	CC(C)(C)[C@@H]1C[C@@H](F)C2=NN(c3ccc(O)cc3)[C]N21
185	CC(C)(C)[C@@H]1C[C@@H](F)C2=NN(c3ccc([N+](=O)[O-])cc3)[C]N21
186	CC(C)(C)[C@@H]1C[C@@H](F)C2=NN(c3ccccc3)[C]N21
187	CC(C)(C)[C@@H]1C[C@@H](c2ccccc2)C2=NN(C3CCCCC3)[C]N21
188	CC(C)(C)[C@@H]1C[C@@H](c2ccccc2)C2=NN(Cc3ccccc3)[C]N21
189	CC(C)(C)[C@@H]1C[C@@H](c2ccccc2)C2=NN(Cc3ccccn3)[C]N21
190	CC(C)(C)[C@@H]1C[C@@H](c2ccccc2)C2=NN(c3c(Cl)cc(Cl)cc3Cl)[C]N21
191	CC(C)(C)[C@@H]1C[C@@H](c2ccccc2)C2=NN(c3c(F)c(F)c(F)c(F)c3F)[C]N21
192	CC(C)(C)[C@@H]1C[C@@H](c2ccccc2)C2=NN(c3c(F)cccc3F)[C]N21
193	CC(C)(C)[C@@H]1C[C@@H](c2ccccc2)C2=NN(c3cc(C(F)(F)F)cc(C(F)(F)F)c3)[C]N21
194	CC(C)(C)[C@@H]1C[C@@H](c2ccccc2)C2=NN(c3cc(Cl)cc(Cl)c3)[C]N21
195	CC(C)(C)[C@@H]1C[C@@H](c2ccccc2)C2=NN(c3cc(F)c(F)c(F)c3)[C]N21
196	CC(C)(C)[C@@H]1C[C@@H](c2ccccc2)C2=NN(c3cc(F)cc(F)c3)[C]N21
197	CC(C)(C)[C@@H]1C[C@@H](c2ccccc2)C2=NN(c3cc([N+](=O)[O-])cc([N+](=O)[O-])c3)[C]N21
198	CC(C)(C)[C@@H]1C[C@@H](c2ccccc2)C2=NN(c3ccc(Br)cc3)[C]N21
199	CC(C)(C)[C@@H]1C[C@@H](c2ccccc2)C2=NN(c3ccc(C#N)cc3)[C]N21
200	CC(C)(C)[C@@H]1C[C@@H](c2ccccc2)C2=NN(c3ccc(C(F)(F)F)cc3)[C]N21
201	CC(C)(C)[C@@H]1C[C@@H](c2ccccc2)C2=NN(c3ccc(Cl)cc3)[C]N21
202	CC(C)(C)[C@@H]1C[C@@H](c2ccccc2)C2=NN(c3ccc(F)cc3)[C]N21
203	CC(C)(C)[C@@H]1C[C@@H](c2ccccc2)C2=NN(c3ccc(O)cc3)[C]N21
204	CC(C)(C)[C@@H]1C[C@@H](c2ccccc2)C2=NN(c3ccc([N+](=O)[O-])cc3)[C]N21
205	CC(C)(C)[C@@H]1C[C@@H](c2ccccc2)C2=NN(c3ccccc3)[C]N21
206	CC(C)(C)[C@H]1CCC2=CS[C]N21
207	CC(C)(C)[C@H]1COC2=NN(C3CCCCC3)[C]N21
208	CC(C)(C)[C@H]1COC2=NN(Cc3ccccc3)[C]N21
209	CC(C)(C)[C@H]1COC2=NN(Cc3ccccn3)[C]N21
210	CC(C)(C)[C@H]1COC2=NN(c3c(Cl)cc(Cl)cc3Cl)[C]N21
211	CC(C)(C)[C@H]1COC2=NN(c3c(F)c(F)c(F)c(F)c3F)[C]N21
213	CC(C)(C)[C@H]1COC2=NN(c3cc(C(F)(F)F)cc(C(F)(F)F)c3)[C]N21
214	CC(C)(C)[C@H]1COC2=NN(c3cc(Cl)cc(Cl)c3)[C]N21
215	CC(C)(C)[C@H]1COC2=NN(c3cc(F)c(F)c(F)c3)[C]N21
216	CC(C)(C)[C@H]1COC2=NN(c3cc(F)cc(F)c3)[C]N21
217	CC(C)(C)[C@H]1COC2=NN(c3cc([N+](=O)[O-])cc([N+](=O)[O-])c3)[C]N21
218	CC(C)(C)[C@H]1COC2=NN(c3ccc(Br)cc3)[C]N21
220	CC(C)(C)[C@H]1COC2=NN(c3ccc(C(F)(F)F)cc3)[C]N21
221	CC(C)(C)[C@H]1COC2=NN(c3ccc(Cl)cc3)[C]N21
222	CC(C)(C)[C@H]1COC2=NN(c3ccc(F)cc3)[C]N21
223	CC(C)(C)[C@H]1COC2=NN(c3ccc(O)cc3)[C]N21
224	CC(C)(C)[C@H]1COC2=NN(c3ccc([N+](=O)[O-])cc3)[C]N21
225	CC(C)(C)[C@H]1COC2=NN(c3ccccc3)[C]N21
226	CC(C)(C)[C@H]1COCC2=NN(C3CCCCC3)[C]N21
227	CC(C)(C)[C@H]1COCC2=NN(Cc3ccccc3)[C]N21
228	CC(C)(C)[C@H]1COCC2=NN(Cc3ccccn3)[C]N21
229	CC(C)(C)[C@H]1COCC2=NN(c3c(Cl)cc(Cl)cc3Cl)[C]N21
230	CC(C)(C)[C@H]1COCC2=NN(c3c(F)c(F)c(F)c(F)c3F)[C]N21
231	CC(C)(C)[C@H]1COCC2=NN(c3c(F)cccc3F)[C]N21
232	CC(C)(C)[C@H]1COCC2=NN(c3cc(C(F)(F)F)cc(C(F)(F)F)c3)[C]N21
233	CC(C)(C)[C@H]1COCC2=NN(c3cc(Cl)cc(Cl)c3)[C]N21
234	CC(C)(C)[C@H]1COCC2=NN(c3cc(F)c(F)c(F)c3)[C]N21
235	CC(C)(C)[C@H]1COCC2=NN(c3cc(F)cc(F)c3)[C]N21
236	CC(C)(C)[C@H]1COCC2=NN(c3cc([N+](=O)[O-])cc([N+](=O)[O-])c3)[C]N21
237	CC(C)(C)[C@H]1COCC2=NN(c3ccc(Br)cc3)[C]N21
238	CC(C)(C)[C@H]1COCC2=NN(c3ccc(C#N)cc3)[C]N21
239	CC(C)(C)[C@H]1COCC2=NN(c3ccc(C(F)(F)F)cc3)[C]N21
240	CC(C)(C)[C@H]1COCC2=NN(c3ccc(Cl)cc3)[C]N21
241	CC(C)(C)[C@H]1COCC2=NN(c3ccc(F)cc3)[C]N21
242	CC(C)(C)[C@H]1COCC2=NN(c3ccc(O)cc3)[C]N21
243	CC(C)(C)[C@H]1COCC2=NN(c3ccc([N+](=O)[O-])cc3)[C]N21
244	CC(C)(C)[C@H]1COCC2=NN(c3ccccc3)[C]N21
245	CC(C)(C)[C@H]1COCC2=NS[C]N21
246	CC(C)(C)[C@H]1C[C@H](C#N)C2=CS[C]N21
247	CC(C)(C)[C@H]1C[C@H](C(F)(F)F)C2=CS[C]N21
248	CC(C)(C)[C@H]1C[C@H](CCO)C2=CS[C]N21
249	CC(C)(C)[C@H]1C[C@H](Cc2ccccc2)C2=CS[C]N21
250	CC(C)(C)[C@H]1C[C@H](Cl)C2=CS[C]N21
251	CC(C)(C)[C@H]1C[C@H](F)C2=CS[C]N21
252	CC(C)(C)[C@H]1C[C@H](c2ccccc2)C2=CS[C]N21
253	CC(C)(C)c1cc(N2[C]N(c3cc(C(C)(C)C)cc(C(C)(C)C)c3)C(C#N)=C2C#N)cc(C(C)(C)C)c1
254	CC(C)(C)c1cc(N2[C]N(c3cc(C(C)(C)C)cc(C(C)(C)C)c3)C(C#N)=N2)cc(C(C)(C)C)c1
255	CC(C)(C)c1cc(N2[C]N(c3cc(C(C)(C)C)cc(C(C)(C)C)c3)C(C(F)(F)F)=C2C(F)(F)F)cc(C(C)(C)C)c1
256	CC(C)(C)c1cc(N2[C]N(c3cc(C(C)(C)C)cc(C(C)(C)C)c3)C(C(F)(F)F)=N2)cc(C(C)(C)C)c1
257	CC(C)(C)c1cc(N2[C]N(c3cc(C(C)(C)C)cc(C(C)(C)C)c3)C(CCO)=C2CCO)cc(C(C)(C)C)c1
258	CC(C)(C)c1cc(N2[C]N(c3cc(C(C)(C)C)cc(C(C)(C)C)c3)C(CCO)=N2)cc(C(C)(C)C)c1
259	CC(C)(C)c1cc(N2[C]N(c3cc(C(C)(C)C)cc(C(C)(C)C)c3)C(Cc3ccccc3)=C2Cc2ccccc2)cc(C(C)(C)C)c1
260	CC(C)(C)c1cc(N2[C]N(c3cc(C(C)(C)C)cc(C(C)(C)C)c3)C(Cc3ccccc3)=N2)cc(C(C)(C)C)c1
261	CC(C)(C)c1cc(N2[C]N(c3cc(C(C)(C)C)cc(C(C)(C)C)c3)C(Cl)=C2Cl)cc(C(C)(C)C)c1
262	CC(C)(C)c1cc(N2[C]N(c3cc(C(C)(C)C)cc(C(C)(C)C)c3)C(Cl)=N2)cc(C(C)(C)C)c1
263	CC(C)(C)c1cc(N2[C]N(c3cc(C(C)(C)C)cc(C(C)(C)C)c3)C(F)=C2F)cc(C(C)(C)C)c1
264	CC(C)(C)c1cc(N2[C]N(c3cc(C(C)(C)C)cc(C(C)(C)C)c3)C(F)=N2)cc(C(C)(C)C)c1
265	CC(C)(C)c1cc(N2[C]N(c3cc(C(C)(C)C)cc(C(C)(C)C)c3)C(c3ccccc3)=C2c2ccccc2)cc(C(C)(C)C)c1
266	CC(C)(C)c1cc(N2[C]N(c3cc(C(C)(C)C)cc(C(C)(C)C)c3)C(c3ccccc3)=N2)cc(C(C)(C)C)c1
267	CC(C)(C)c1cc(N2[C]N(c3cc(C(C)(C)C)cc(C(C)(C)C)c3)C=C2)cc(C(C)(C)C)c1
268	CC(C)(C)c1cc(N2[C]N(c3cc(C(C)(C)C)cc(C(C)(C)C)c3)CC2)cc(C(C)(C)C)c1
269	CC(C)(C)c1cc(N2[C]N(c3cc(C(C)(C)C)cc(C(C)(C)C)c3)N=C2)cc(C(C)(C)C)c1
270	CC(C)(C)c1cc(N2[C]N(c3cc(C(C)(C)C)cc(C(C)(C)C)c3)N=N2)cc(C(C)(C)C)c1
271	CC(C)(C)c1cc(N2[C]N(c3cc(C(C)(C)C)cc(C(C)(C)C)c3)[C@@H](C#N)[C@@H]2C#N)cc(C(C)(C)C)c1
272	CC(C)(C)c1cc(N2[C]N(c3cc(C(C)(C)C)cc(C(C)(C)C)c3)[C@@H](C(F)(F)F)[C@@H]2C(F)(F)F)cc(C(C)(C)C)c1
273	CC(C)(C)c1cc(N2[C]N(c3cc(C(C)(C)C)cc(C(C)(C)C)c3)[C@@H](CCO)[C@@H]2CCO)cc(C(C)(C)C)c1
274	CC(C)(C)c1cc(N2[C]N(c3cc(C(C)(C)C)cc(C(C)(C)C)c3)[C@@H](Cc3ccccc3)[C@@H]2Cc2ccccc2)cc(C(C)(C)C)c1
275	CC(C)(C)c1cc(N2[C]N(c3cc(C(C)(C)C)cc(C(C)(C)C)c3)[C@@H](Cl)[C@@H]2Cl)cc(C(C)(C)C)c1
276	CC(C)(C)c1cc(N2[C]N(c3cc(C(C)(C)C)cc(C(C)(C)C)c3)[C@@H](F)[C@@H]2F)cc(C(C)(C)C)c1
277	CC(C)(C)c1cc(N2[C]N(c3cc(C(C)(C)C)cc(C(C)(C)C)c3)[C@@H](c3ccccc3)[C@@H]2c2ccccc2)cc(C(C)(C)C)c1
278	CC(C)(C)c1cc(N2[C]N(c3cc(C(C)(C)C)cc(C(C)(C)C)c3)[C@@H]3CCCC[C@H]32)cc(C(C)(C)C)c1
279	CC(C)(C)c1cc(N2[C]N(c3cc(C(C)(C)C)cc(C(C)(C)C)c3)c3ccccc32)cc(C(C)(C)C)c1
280	CC(C)(C)c1cc(N2[C]N3C(=C2)CO[C@H]2Cc4ccccc4[C@H]23)cc(C(C)(C)C)c1
281	CC(C)(C)c1cc(N2[C]N3C(=C2C#N)CO[C@H]2Cc4ccccc4[C@H]23)cc(C(C)(C)C)c1
282	CC(C)(C)c1cc(N2[C]N3C(=C2C(F)(F)F)CO[C@H]2Cc4ccccc4[C@H]23)cc(C(C)(C)C)c1
283	CC(C)(C)c1cc(N2[C]N3C(=C2CCO)CO[C@H]2Cc4ccccc4[C@H]23)cc(C(C)(C)C)c1
284	CC(C)(C)c1cc(N2[C]N3C(=C2Cc2ccccc2)CO[C@H]2Cc4ccccc4[C@H]23)cc(C(C)(C)C)c1
285	CC(C)(C)c1cc(N2[C]N3C(=C2Cl)CO[C@H]2Cc4ccccc4[C@H]23)cc(C(C)(C)C)c1
286	CC(C)(C)c1cc(N2[C]N3C(=C2F)CO[C@H]2Cc4ccccc4[C@H]23)cc(C(C)(C)C)c1
287	CC(C)(C)c1cc(N2[C]N3C(=C2c2ccccc2)CO[C@H]2Cc4ccccc4[C@H]23)cc(C(C)(C)C)c1
288	CC(C)(C)c1cc(N2[C]N3C(=N2)CC[C@H]3C(C)(C)C)cc(C(C)(C)C)c1
289	CC(C)(C)c1cc(N2[C]N3C(=N2)CC[C@H]3C(F)(c2ccccc2)c2ccccc2)cc(C(C)(C)C)c1
290	CC(C)(C)c1cc(N2[C]N3C(=N2)CC[C@H]3C(O)(c2cc(C(F)(F)F)cc(C(F)(F)F)c2)c2cc(C(F)(F)F)cc(C(F)(F)F)c2)cc(C(C)(C)C)c1
291	CC(C)(C)c1cc(N2[C]N3C(=N2)CC[C@H]3C(O)(c2ccccc2)c2ccccc2)cc(C(C)(C)C)c1
292	CC(C)(C)c1cc(N2[C]N3C(=N2)CC[C@H]3C(O[Si](C)(C)C)(c2ccccc2)c2ccccc2)cc(C(C)(C)C)c1
293	CC(C)(C)c1cc(N2[C]N3C(=N2)CC[C@H]3C(c2ccccc2)c2ccccc2)cc(C(C)(C)C)c1
294	CC(C)(C)c1cc(N2[C]N3C(=N2)CC[C@H]3C2CCCCC2)cc(C(C)(C)C)c1
295	CC(C)(C)c1cc(N2[C]N3C(=N2)CC[C@H]3COc2ccccc2)cc(C(C)(C)C)c1
296	CC(C)(C)c1cc(N2[C]N3C(=N2)CC[C@H]3Cc2ccccc2)cc(C(C)(C)C)c1
297	CC(C)(C)c1cc(N2[C]N3C(=N2)CC[C@H]3c2ccccc2)cc(C(C)(C)C)c1
298	CC(C)(C)c1cc(N2[C]N3C(=N2)COC[C@@H]3C(C)(C)C)cc(C(C)(C)C)c1
299	CC(C)(C)c1cc(N2[C]N3C(=N2)COC[C@@H]3C(F)(c2ccccc2)c2ccccc2)cc(C(C)(C)C)c1
300	CC(C)(C)c1cc(N2[C]N3C(=N2)COC[C@@H]3C(O)(c2cc(C(F)(F)F)cc(C(F)(F)F)c2)c2cc(C(F)(F)F)cc(C(F)(F)F)c2)cc(C(C)(C)C)c1
301	CC(C)(C)c1cc(N2[C]N3C(=N2)COC[C@@H]3C(O)(c2ccccc2)c2ccccc2)cc(C(C)(C)C)c1
302	CC(C)(C)c1cc(N2[C]N3C(=N2)COC[C@@H]3C(O[Si](C)(C)C)(c2ccccc2)c2ccccc2)cc(C(C)(C)C)c1
303	CC(C)(C)c1cc(N2[C]N3C(=N2)COC[C@@H]3C(c2ccccc2)c2ccccc2)cc(C(C)(C)C)c1
304	CC(C)(C)c1cc(N2[C]N3C(=N2)COC[C@@H]3C2CCCCC2)cc(C(C)(C)C)c1
305	CC(C)(C)c1cc(N2[C]N3C(=N2)COC[C@@H]3COc2ccccc2)cc(C(C)(C)C)c1
306	CC(C)(C)c1cc(N2[C]N3C(=N2)COC[C@@H]3Cc2ccccc2)cc(C(C)(C)C)c1
307	CC(C)(C)c1cc(N2[C]N3C(=N2)COC[C@@H]3c2ccccc2)cc(C(C)(C)C)c1
308	CC(C)(C)c1cc(N2[C]N3C(=N2)CO[C@H]2Cc4ccccc4[C@H]23)cc(C(C)(C)C)c1
309	CC(C)(C)c1cc(N2[C]N3C(=N2)C[C@@H]2CCc4ccccc4[C@@H]23)cc(C(C)(C)C)c1
310	CC(C)(C)c1cc(N2[C]N3C(=N2)OC[C@@H]3C(C)(C)C)cc(C(C)(C)C)c1
311	CC(C)(C)c1cc(N2[C]N3C(=N2)OC[C@@H]3C(F)(c2ccccc2)c2ccccc2)cc(C(C)(C)C)c1
312	CC(C)(C)c1cc(N2[C]N3C(=N2)OC[C@@H]3C(O)(c2cc(C(F)(F)F)cc(C(F)(F)F)c2)c2cc(C(F)(F)F)cc(C(F)(F)F)c2)cc(C(C)(C)C)c1
313	CC(C)(C)c1cc(N2[C]N3C(=N2)OC[C@@H]3C(O)(c2ccccc2)c2ccccc2)cc(C(C)(C)C)c1
314	CC(C)(C)c1cc(N2[C]N3C(=N2)OC[C@@H]3C(O[Si](C)(C)C)(c2ccccc2)c2ccccc2)cc(C(C)(C)C)c1
315	CC(C)(C)c1cc(N2[C]N3C(=N2)OC[C@@H]3C(c2ccccc2)c2ccccc2)cc(C(C)(C)C)c1
316	CC(C)(C)c1cc(N2[C]N3C(=N2)OC[C@@H]3C2CCCCC2)cc(C(C)(C)C)c1
317	CC(C)(C)c1cc(N2[C]N3C(=N2)OC[C@@H]3COc2ccccc2)cc(C(C)(C)C)c1
318	CC(C)(C)c1cc(N2[C]N3C(=N2)OC[C@@H]3Cc2ccccc2)cc(C(C)(C)C)c1
319	CC(C)(C)c1cc(N2[C]N3C(=N2)OC[C@@H]3c2ccccc2)cc(C(C)(C)C)c1
320	CC(C)(C)c1cc(N2[C]N3C(=N2)[C@H](C#N)C[C@H]3C(C)(C)C)cc(C(C)(C)C)c1
321	CC(C)(C)c1cc(N2[C]N3C(=N2)[C@H](C#N)C[C@H]3C(F)(c2ccccc2)c2ccccc2)cc(C(C)(C)C)c1
322	CC(C)(C)c1cc(N2[C]N3C(=N2)[C@H](C#N)C[C@H]3C(O)(c2cc(C(F)(F)F)cc(C(F)(F)F)c2)c2cc(C(F)(F)F)cc(C(F)(F)F)c2)cc(C(C)(C)C)c1
323	CC(C)(C)c1cc(N2[C]N3C(=N2)[C@H](C#N)C[C@H]3C(O)(c2ccccc2)c2ccccc2)cc(C(C)(C)C)c1
324	CC(C)(C)c1cc(N2[C]N3C(=N2)[C@H](C#N)C[C@H]3C(O[Si](C)(C)C)(c2ccccc2)c2ccccc2)cc(C(C)(C)C)c1
325	CC(C)(C)c1cc(N2[C]N3C(=N2)[C@H](C#N)C[C@H]3C(c2ccccc2)c2ccccc2)cc(C(C)(C)C)c1
326	CC(C)(C)c1cc(N2[C]N3C(=N2)[C@H](C#N)C[C@H]3C2CCCCC2)cc(C(C)(C)C)c1
327	CC(C)(C)c1cc(N2[C]N3C(=N2)[C@H](C#N)C[C@H]3COc2ccccc2)cc(C(C)(C)C)c1
328	CC(C)(C)c1cc(N2[C]N3C(=N2)[C@H](C#N)C[C@H]3Cc2ccccc2)cc(C(C)(C)C)c1
329	CC(C)(C)c1cc(N2[C]N3C(=N2)[C@H](C#N)C[C@H]3c2ccccc2)cc(C(C)(C)C)c1
330	CC(C)(C)c1cc(N2[C]N3C(=N2)[C@H](C(F)(F)F)C[C@H]3C(C)(C)C)cc(C(C)(C)C)c1
331	CC(C)(C)c1cc(N2[C]N3C(=N2)[C@H](C(F)(F)F)C[C@H]3C(F)(c2ccccc2)c2ccccc2)cc(C(C)(C)C)c1
332	CC(C)(C)c1cc(N2[C]N3C(=N2)[C@H](C(F)(F)F)C[C@H]3C(O)(c2cc(C(F)(F)F)cc(C(F)(F)F)c2)c2cc(C(F)(F)F)cc(C(F)(F)F)c2)cc(C(C)(C)C)c1
333	CC(C)(C)c1cc(N2[C]N3C(=N2)[C@H](C(F)(F)F)C[C@H]3C(O)(c2ccccc2)c2ccccc2)cc(C(C)(C)C)c1
334	CC(C)(C)c1cc(N2[C]N3C(=N2)[C@H](C(F)(F)F)C[C@H]3C(O[Si](C)(C)C)(c2ccccc2)c2ccccc2)cc(C(C)(C)C)c1
335	CC(C)(C)c1cc(N2[C]N3C(=N2)[C@H](C(F)(F)F)C[C@H]3C(c2ccccc2)c2ccccc2)cc(C(C)(C)C)c1
336	CC(C)(C)c1cc(N2[C]N3C(=N2)[C@H](C(F)(F)F)C[C@H]3C2CCCCC2)cc(C(C)(C)C)c1
337	CC(C)(C)c1cc(N2[C]N3C(=N2)[C@H](C(F)(F)F)C[C@H]3COc2ccccc2)cc(C(C)(C)C)c1
338	CC(C)(C)c1cc(N2[C]N3C(=N2)[C@H](C(F)(F)F)C[C@H]3Cc2ccccc2)cc(C(C)(C)C)c1
339	CC(C)(C)c1cc(N2[C]N3C(=N2)[C@H](C(F)(F)F)C[C@H]3c2ccccc2)cc(C(C)(C)C)c1
340	CC(C)(C)c1cc(N2[C]N3C(=N2)[C@H](CCO)C[C@H]3C(C)(C)C)cc(C(C)(C)C)c1
341	CC(C)(C)c1cc(N2[C]N3C(=N2)[C@H](CCO)C[C@H]3C(F)(c2ccccc2)c2ccccc2)cc(C(C)(C)C)c1
342	CC(C)(C)c1cc(N2[C]N3C(=N2)[C@H](CCO)C[C@H]3C(O)(c2cc(C(F)(F)F)cc(C(F)(F)F)c2)c2cc(C(F)(F)F)cc(C(F)(F)F)c2)cc(C(C)(C)C)c1
343	CC(C)(C)c1cc(N2[C]N3C(=N2)[C@H](CCO)C[C@H]3C(O)(c2ccccc2)c2ccccc2)cc(C(C)(C)C)c1
344	CC(C)(C)c1cc(N2[C]N3C(=N2)[C@H](CCO)C[C@H]3C(O[Si](C)(C)C)(c2ccccc2)c2ccccc2)cc(C(C)(C)C)c1
345	CC(C)(C)c1cc(N2[C]N3C(=N2)[C@H](CCO)C[C@H]3C(c2ccccc2)c2ccccc2)cc(C(C)(C)C)c1
346	CC(C)(C)c1cc(N2[C]N3C(=N2)[C@H](CCO)C[C@H]3C2CCCCC2)cc(C(C)(C)C)c1
347	CC(C)(C)c1cc(N2[C]N3C(=N2)[C@H](CCO)C[C@H]3COc2ccccc2)cc(C(C)(C)C)c1
348	CC(C)(C)c1cc(N2[C]N3C(=N2)[C@H](CCO)C[C@H]3Cc2ccccc2)cc(C(C)(C)C)c1
349	CC(C)(C)c1cc(N2[C]N3C(=N2)[C@H](CCO)C[C@H]3c2ccccc2)cc(C(C)(C)C)c1
350	CC(C)(C)c1cc(N2[C]N3C(=N2)[C@H](Cc2ccccc2)C[C@H]3C(C)(C)C)cc(C(C)(C)C)c1
351	CC(C)(C)c1cc(N2[C]N3C(=N2)[C@H](Cc2ccccc2)C[C@H]3C(F)(c2ccccc2)c2ccccc2)cc(C(C)(C)C)c1
352	CC(C)(C)c1cc(N2[C]N3C(=N2)[C@H](Cc2ccccc2)C[C@H]3C(O)(c2cc(C(F)(F)F)cc(C(F)(F)F)c2)c2cc(C(F)(F)F)cc(C(F)(F)F)c2)cc(C(C)(C)C)c1
353	CC(C)(C)c1cc(N2[C]N3C(=N2)[C@H](Cc2ccccc2)C[C@H]3C(O)(c2ccccc2)c2ccccc2)cc(C(C)(C)C)c1
354	CC(C)(C)c1cc(N2[C]N3C(=N2)[C@H](Cc2ccccc2)C[C@H]3C(O[Si](C)(C)C)(c2ccccc2)c2ccccc2)cc(C(C)(C)C)c1
355	CC(C)(C)c1cc(N2[C]N3C(=N2)[C@H](Cc2ccccc2)C[C@H]3C(c2ccccc2)c2ccccc2)cc(C(C)(C)C)c1
356	CC(C)(C)c1cc(N2[C]N3C(=N2)[C@H](Cc2ccccc2)C[C@H]3C2CCCCC2)cc(C(C)(C)C)c1
357	CC(C)(C)c1cc(N2[C]N3C(=N2)[C@H](Cc2ccccc2)C[C@H]3COc2ccccc2)cc(C(C)(C)C)c1
358	CC(C)(C)c1cc(N2[C]N3C(=N2)[C@H](Cc2ccccc2)C[C@H]3Cc2ccccc2)cc(C(C)(C)C)c1
359	CC(C)(C)c1cc(N2[C]N3C(=N2)[C@H](Cc2ccccc2)C[C@H]3c2ccccc2)cc(C(C)(C)C)c1
360	CC(C)(C)c1cc(N2[C]N3C(=N2)[C@H](Cl)C[C@H]3C(C)(C)C)cc(C(C)(C)C)c1
361	CC(C)(C)c1cc(N2[C]N3C(=N2)[C@H](Cl)C[C@H]3C(F)(c2ccccc2)c2ccccc2)cc(C(C)(C)C)c1
362	CC(C)(C)c1cc(N2[C]N3C(=N2)[C@H](Cl)C[C@H]3C(O)(c2cc(C(F)(F)F)cc(C(F)(F)F)c2)c2cc(C(F)(F)F)cc(C(F)(F)F)c2)cc(C(C)(C)C)c1
363	CC(C)(C)c1cc(N2[C]N3C(=N2)[C@H](Cl)C[C@H]3C(O)(c2ccccc2)c2ccccc2)cc(C(C)(C)C)c1
364	CC(C)(C)c1cc(N2[C]N3C(=N2)[C@H](Cl)C[C@H]3C(O[Si](C)(C)C)(c2ccccc2)c2ccccc2)cc(C(C)(C)C)c1
365	CC(C)(C)c1cc(N2[C]N3C(=N2)[C@H](Cl)C[C@H]3C(c2ccccc2)c2ccccc2)cc(C(C)(C)C)c1
366	CC(C)(C)c1cc(N2[C]N3C(=N2)[C@H](Cl)C[C@H]3C2CCCCC2)cc(C(C)(C)C)c1
367	CC(C)(C)c1cc(N2[C]N3C(=N2)[C@H](Cl)C[C@H]3COc2ccccc2)cc(C(C)(C)C)c1
368	CC(C)(C)c1cc(N2[C]N3C(=N2)[C@H](Cl)C[C@H]3Cc2ccccc2)cc(C(C)(C)C)c1
369	CC(C)(C)c1cc(N2[C]N3C(=N2)[C@H](Cl)C[C@H]3c2ccccc2)cc(C(C)(C)C)c1
370	CC(C)(C)c1cc(N2[C]N3C(=N2)[C@H](F)C[C@H]3C(C)(C)C)cc(C(C)(C)C)c1
371	CC(C)(C)c1cc(N2[C]N3C(=N2)[C@H](F)C[C@H]3C(F)(c2ccccc2)c2ccccc2)cc(C(C)(C)C)c1
372	CC(C)(C)c1cc(N2[C]N3C(=N2)[C@H](F)C[C@H]3C(O)(c2cc(C(F)(F)F)cc(C(F)(F)F)c2)c2cc(C(F)(F)F)cc(C(F)(F)F)c2)cc(C(C)(C)C)c1
373	CC(C)(C)c1cc(N2[C]N3C(=N2)[C@H](F)C[C@H]3C(O)(c2ccccc2)c2ccccc2)cc(C(C)(C)C)c1
374	CC(C)(C)c1cc(N2[C]N3C(=N2)[C@H](F)C[C@H]3C(O[Si](C)(C)C)(c2ccccc2)c2ccccc2)cc(C(C)(C)C)c1
375	CC(C)(C)c1cc(N2[C]N3C(=N2)[C@H](F)C[C@H]3C(c2ccccc2)c2ccccc2)cc(C(C)(C)C)c1
376	CC(C)(C)c1cc(N2[C]N3C(=N2)[C@H](F)C[C@H]3C2CCCCC2)cc(C(C)(C)C)c1
377	CC(C)(C)c1cc(N2[C]N3C(=N2)[C@H](F)C[C@H]3COc2ccccc2)cc(C(C)(C)C)c1
378	CC(C)(C)c1cc(N2[C]N3C(=N2)[C@H](F)C[C@H]3Cc2ccccc2)cc(C(C)(C)C)c1
379	CC(C)(C)c1cc(N2[C]N3C(=N2)[C@H](F)C[C@H]3c2ccccc2)cc(C(C)(C)C)c1
380	CC(C)(C)c1cc(N2[C]N3C(=N2)[C@H](c2ccccc2)C[C@H]3C(C)(C)C)cc(C(C)(C)C)c1
381	CC(C)(C)c1cc(N2[C]N3C(=N2)[C@H](c2ccccc2)C[C@H]3C(F)(c2ccccc2)c2ccccc2)cc(C(C)(C)C)c1
382	CC(C)(C)c1cc(N2[C]N3C(=N2)[C@H](c2ccccc2)C[C@H]3C(O)(c2cc(C(F)(F)F)cc(C(F)(F)F)c2)c2cc(C(F)(F)F)cc(C(F)(F)F)c2)cc(C(C)(C)C)c1
383	CC(C)(C)c1cc(N2[C]N3C(=N2)[C@H](c2ccccc2)C[C@H]3C(O)(c2ccccc2)c2ccccc2)cc(C(C)(C)C)c1
384	CC(C)(C)c1cc(N2[C]N3C(=N2)[C@H](c2ccccc2)C[C@H]3C(O[Si](C)(C)C)(c2ccccc2)c2ccccc2)cc(C(C)(C)C)c1
385	CC(C)(C)c1cc(N2[C]N3C(=N2)[C@H](c2ccccc2)C[C@H]3C(c2ccccc2)c2ccccc2)cc(C(C)(C)C)c1
386	CC(C)(C)c1cc(N2[C]N3C(=N2)[C@H](c2ccccc2)C[C@H]3C2CCCCC2)cc(C(C)(C)C)c1
387	CC(C)(C)c1cc(N2[C]N3C(=N2)[C@H](c2ccccc2)C[C@H]3COc2ccccc2)cc(C(C)(C)C)c1
388	CC(C)(C)c1cc(N2[C]N3C(=N2)[C@H](c2ccccc2)C[C@H]3Cc2ccccc2)cc(C(C)(C)C)c1
389	CC(C)(C)c1cc(N2[C]N3C(=N2)[C@H](c2ccccc2)C[C@H]3c2ccccc2)cc(C(C)(C)C)c1
390	CC(C)(C)c1cc(N2[C]N3C=CC=CC3=N2)cc(C(C)(C)C)c1
391	CC(C)(C)c1cc(N2[C]N3CCCC3=N2)cc(C(C)(C)C)c1
392	CC(C)(C)c1cc(N2[C]N3CCOC3=N2)cc(C(C)(C)C)c1
393	CC(C)(C)c1cc(N2[C]N3CCOCC3=N2)cc(C(C)(C)C)c1
394	CC(C)(C)c1cc(N2[C]N3CC[C@@H](C#N)C3=N2)cc(C(C)(C)C)c1
395	CC(C)(C)c1cc(N2[C]N3CC[C@@H](C(F)(F)F)C3=N2)cc(C(C)(C)C)c1
396	CC(C)(C)c1cc(N2[C]N3CC[C@@H](CCO)C3=N2)cc(C(C)(C)C)c1
397	CC(C)(C)c1cc(N2[C]N3CC[C@@H](Cc4ccccc4)C3=N2)cc(C(C)(C)C)c1
398	CC(C)(C)c1cc(N2[C]N3CC[C@@H](Cl)C3=N2)cc(C(C)(C)C)c1
399	CC(C)(C)c1cc(N2[C]N3CC[C@@H](F)C3=N2)cc(C(C)(C)C)c1
400	CC(C)(C)c1cc(N2[C]N3CC[C@@H](c4ccccc4)C3=N2)cc(C(C)(C)C)c1
401	CC(C)(C)c1cc(N2[C]OC(C#N)=N2)cc(C(C)(C)C)c1
402	CC(C)(C)c1cc(N2[C]OC(C(F)(F)F)=N2)cc(C(C)(C)C)c1
403	CC(C)(C)c1cc(N2[C]OC(CCO)=N2)cc(C(C)(C)C)c1
404	CC(C)(C)c1cc(N2[C]OC(Cc3ccccc3)=N2)cc(C(C)(C)C)c1
405	CC(C)(C)c1cc(N2[C]OC(Cl)=N2)cc(C(C)(C)C)c1
406	CC(C)(C)c1cc(N2[C]OC(F)=N2)cc(C(C)(C)C)c1
407	CC(C)(C)c1cc(N2[C]OC(c3ccccc3)=N2)cc(C(C)(C)C)c1
408	CC(C)(C)c1cc(N2[C]OC=N2)cc(C(C)(C)C)c1
409	CC(C)(C)c1cc(N2[C]SC(C#N)=C2C#N)cc(C(C)(C)C)c1
410	CC(C)(C)c1cc(N2[C]SC(C(F)(F)F)=C2C(F)(F)F)cc(C(C)(C)C)c1
411	CC(C)(C)c1cc(N2[C]SC(CCO)=C2CCO)cc(C(C)(C)C)c1
412	CC(C)(C)c1cc(N2[C]SC(Cc3ccccc3)=C2Cc2ccccc2)cc(C(C)(C)C)c1
413	CC(C)(C)c1cc(N2[C]SC(Cl)=C2Cl)cc(C(C)(C)C)c1
414	CC(C)(C)c1cc(N2[C]SC(F)=C2F)cc(C(C)(C)C)c1
415	CC(C)(C)c1cc(N2[C]SC(c3ccccc3)=C2c2ccccc2)cc(C(C)(C)C)c1
416	CC(C)(C)c1cc(N2[C]SC=C2)cc(C(C)(C)C)c1
417	CC(C)(C)c1ccc(N2[C]N(c3ccc(C(C)(C)C)cc3)C(C#N)=C2C#N)cc1
418	CC(C)(C)c1ccc(N2[C]N(c3ccc(C(C)(C)C)cc3)C(C#N)=N2)cc1
419	CC(C)(C)c1ccc(N2[C]N(c3ccc(C(C)(C)C)cc3)C(C(F)(F)F)=C2C(F)(F)F)cc1
420	CC(C)(C)c1ccc(N2[C]N(c3ccc(C(C)(C)C)cc3)C(C(F)(F)F)=N2)cc1
421	CC(C)(C)c1ccc(N2[C]N(c3ccc(C(C)(C)C)cc3)C(CCO)=C2CCO)cc1
422	CC(C)(C)c1ccc(N2[C]N(c3ccc(C(C)(C)C)cc3)C(CCO)=N2)cc1
423	CC(C)(C)c1ccc(N2[C]N(c3ccc(C(C)(C)C)cc3)C(Cc3ccccc3)=C2Cc2ccccc2)cc1
424	CC(C)(C)c1ccc(N2[C]N(c3ccc(C(C)(C)C)cc3)C(Cc3ccccc3)=N2)cc1
425	CC(C)(C)c1ccc(N2[C]N(c3ccc(C(C)(C)C)cc3)C(Cl)=C2Cl)cc1
426	CC(C)(C)c1ccc(N2[C]N(c3ccc(C(C)(C)C)cc3)C(Cl)=N2)cc1
427	CC(C)(C)c1ccc(N2[C]N(c3ccc(C(C)(C)C)cc3)C(F)=C2F)cc1
428	CC(C)(C)c1ccc(N2[C]N(c3ccc(C(C)(C)C)cc3)C(F)=N2)cc1
429	CC(C)(C)c1ccc(N2[C]N(c3ccc(C(C)(C)C)cc3)C(c3ccccc3)=C2c2ccccc2)cc1
430	CC(C)(C)c1ccc(N2[C]N(c3ccc(C(C)(C)C)cc3)C(c3ccccc3)=N2)cc1
431	CC(C)(C)c1ccc(N2[C]N(c3ccc(C(C)(C)C)cc3)C=C2)cc1
432	CC(C)(C)c1ccc(N2[C]N(c3ccc(C(C)(C)C)cc3)CC2)cc1
433	CC(C)(C)c1ccc(N2[C]N(c3ccc(C(C)(C)C)cc3)N=C2)cc1
434	CC(C)(C)c1ccc(N2[C]N(c3ccc(C(C)(C)C)cc3)N=N2)cc1
435	CC(C)(C)c1ccc(N2[C]N(c3ccc(C(C)(C)C)cc3)[C@@H](C#N)[C@@H]2C#N)cc1
436	CC(C)(C)c1ccc(N2[C]N(c3ccc(C(C)(C)C)cc3)[C@@H](C(F)(F)F)[C@@H]2C(F)(F)F)cc1
437	CC(C)(C)c1ccc(N2[C]N(c3ccc(C(C)(C)C)cc3)[C@@H](CCO)[C@@H]2CCO)cc1
438	CC(C)(C)c1ccc(N2[C]N(c3ccc(C(C)(C)C)cc3)[C@@H](Cc3ccccc3)[C@@H]2Cc2ccccc2)cc1
439	CC(C)(C)c1ccc(N2[C]N(c3ccc(C(C)(C)C)cc3)[C@@H](Cl)[C@@H]2Cl)cc1
440	CC(C)(C)c1ccc(N2[C]N(c3ccc(C(C)(C)C)cc3)[C@@H](F)[C@@H]2F)cc1
441	CC(C)(C)c1ccc(N2[C]N(c3ccc(C(C)(C)C)cc3)[C@@H](c3ccccc3)[C@@H]2c2ccccc2)cc1
442	CC(C)(C)c1ccc(N2[C]N(c3ccc(C(C)(C)C)cc3)[C@@H]3CCCC[C@H]32)cc1
443	CC(C)(C)c1ccc(N2[C]N(c3ccc(C(C)(C)C)cc3)c3ccccc32)cc1
444	CC(C)(C)c1ccc(N2[C]N3C(=C2)CO[C@H]2Cc4ccccc4[C@H]23)cc1
445	CC(C)(C)c1ccc(N2[C]N3C(=C2C#N)CO[C@H]2Cc4ccccc4[C@H]23)cc1
446	CC(C)(C)c1ccc(N2[C]N3C(=C2C(F)(F)F)CO[C@H]2Cc4ccccc4[C@H]23)cc1
447	CC(C)(C)c1ccc(N2[C]N3C(=C2CCO)CO[C@H]2Cc4ccccc4[C@H]23)cc1
448	CC(C)(C)c1ccc(N2[C]N3C(=C2Cc2ccccc2)CO[C@H]2Cc4ccccc4[C@H]23)cc1
449	CC(C)(C)c1ccc(N2[C]N3C(=C2Cl)CO[C@H]2Cc4ccccc4[C@H]23)cc1
450	CC(C)(C)c1ccc(N2[C]N3C(=C2F)CO[C@H]2Cc4ccccc4[C@H]23)cc1
451	CC(C)(C)c1ccc(N2[C]N3C(=C2c2ccccc2)CO[C@H]2Cc4ccccc4[C@H]23)cc1
452	CC(C)(C)c1ccc(N2[C]N3C(=N2)CC[C@H]3C(C)(C)C)cc1
453	CC(C)(C)c1ccc(N2[C]N3C(=N2)CC[C@H]3C(F)(c2ccccc2)c2ccccc2)cc1
454	CC(C)(C)c1ccc(N2[C]N3C(=N2)CC[C@H]3C(O)(c2cc(C(F)(F)F)cc(C(F)(F)F)c2)c2cc(C(F)(F)F)cc(C(F)(F)F)c2)cc1
455	CC(C)(C)c1ccc(N2[C]N3C(=N2)CC[C@H]3C(O)(c2ccccc2)c2ccccc2)cc1
456	CC(C)(C)c1ccc(N2[C]N3C(=N2)CC[C@H]3C(O[Si](C)(C)C)(c2ccccc2)c2ccccc2)cc1
457	CC(C)(C)c1ccc(N2[C]N3C(=N2)CC[C@H]3C(c2ccccc2)c2ccccc2)cc1
458	CC(C)(C)c1ccc(N2[C]N3C(=N2)CC[C@H]3C2CCCCC2)cc1
459	CC(C)(C)c1ccc(N2[C]N3C(=N2)CC[C@H]3COc2ccccc2)cc1
460	CC(C)(C)c1ccc(N2[C]N3C(=N2)CC[C@H]3Cc2ccccc2)cc1
461	CC(C)(C)c1ccc(N2[C]N3C(=N2)CC[C@H]3c2ccccc2)cc1
462	CC(C)(C)c1ccc(N2[C]N3C(=N2)COC[C@@H]3C(C)(C)C)cc1
463	CC(C)(C)c1ccc(N2[C]N3C(=N2)COC[C@@H]3C(F)(c2ccccc2)c2ccccc2)cc1
464	CC(C)(C)c1ccc(N2[C]N3C(=N2)COC[C@@H]3C(O)(c2cc(C(F)(F)F)cc(C(F)(F)F)c2)c2cc(C(F)(F)F)cc(C(F)(F)F)c2)cc1
465	CC(C)(C)c1ccc(N2[C]N3C(=N2)COC[C@@H]3C(O)(c2ccccc2)c2ccccc2)cc1
466	CC(C)(C)c1ccc(N2[C]N3C(=N2)COC[C@@H]3C(O[Si](C)(C)C)(c2ccccc2)c2ccccc2)cc1
467	CC(C)(C)c1ccc(N2[C]N3C(=N2)COC[C@@H]3C(c2ccccc2)c2ccccc2)cc1
468	CC(C)(C)c1ccc(N2[C]N3C(=N2)COC[C@@H]3C2CCCCC2)cc1
469	CC(C)(C)c1ccc(N2[C]N3C(=N2)COC[C@@H]3COc2ccccc2)cc1
470	CC(C)(C)c1ccc(N2[C]N3C(=N2)COC[C@@H]3Cc2ccccc2)cc1
471	CC(C)(C)c1ccc(N2[C]N3C(=N2)COC[C@@H]3c2ccccc2)cc1
472	CC(C)(C)c1ccc(N2[C]N3C(=N2)CO[C@H]2Cc4ccccc4[C@H]23)cc1
473	CC(C)(C)c1ccc(N2[C]N3C(=N2)C[C@@H]2CCc4ccccc4[C@@H]23)cc1
474	CC(C)(C)c1ccc(N2[C]N3C(=N2)OC[C@@H]3C(C)(C)C)cc1
475	CC(C)(C)c1ccc(N2[C]N3C(=N2)OC[C@@H]3C(F)(c2ccccc2)c2ccccc2)cc1
476	CC(C)(C)c1ccc(N2[C]N3C(=N2)OC[C@@H]3C(O)(c2cc(C(F)(F)F)cc(C(F)(F)F)c2)c2cc(C(F)(F)F)cc(C(F)(F)F)c2)cc1
477	CC(C)(C)c1ccc(N2[C]N3C(=N2)OC[C@@H]3C(O)(c2ccccc2)c2ccccc2)cc1
478	CC(C)(C)c1ccc(N2[C]N3C(=N2)OC[C@@H]3C(O[Si](C)(C)C)(c2ccccc2)c2ccccc2)cc1
479	CC(C)(C)c1ccc(N2[C]N3C(=N2)OC[C@@H]3C(c2ccccc2)c2ccccc2)cc1
480	CC(C)(C)c1ccc(N2[C]N3C(=N2)OC[C@@H]3C2CCCCC2)cc1
481	CC(C)(C)c1ccc(N2[C]N3C(=N2)OC[C@@H]3COc2ccccc2)cc1
482	CC(C)(C)c1ccc(N2[C]N3C(=N2)OC[C@@H]3Cc2ccccc2)cc1
483	CC(C)(C)c1ccc(N2[C]N3C(=N2)OC[C@@H]3c2ccccc2)cc1
484	CC(C)(C)c1ccc(N2[C]N3C(=N2)[C@H](C#N)C[C@H]3C(C)(C)C)cc1
485	CC(C)(C)c1ccc(N2[C]N3C(=N2)[C@H](C#N)C[C@H]3C(F)(c2ccccc2)c2ccccc2)cc1
486	CC(C)(C)c1ccc(N2[C]N3C(=N2)[C@H](C#N)C[C@H]3C(O)(c2cc(C(F)(F)F)cc(C(F)(F)F)c2)c2cc(C(F)(F)F)cc(C(F)(F)F)c2)cc1
487	CC(C)(C)c1ccc(N2[C]N3C(=N2)[C@H](C#N)C[C@H]3C(O)(c2ccccc2)c2ccccc2)cc1
488	CC(C)(C)c1ccc(N2[C]N3C(=N2)[C@H](C#N)C[C@H]3C(O[Si](C)(C)C)(c2ccccc2)c2ccccc2)cc1
489	CC(C)(C)c1ccc(N2[C]N3C(=N2)[C@H](C#N)C[C@H]3C(c2ccccc2)c2ccccc2)cc1
490	CC(C)(C)c1ccc(N2[C]N3C(=N2)[C@H](C#N)C[C@H]3C2CCCCC2)cc1
491	CC(C)(C)c1ccc(N2[C]N3C(=N2)[C@H](C#N)C[C@H]3COc2ccccc2)cc1
492	CC(C)(C)c1ccc(N2[C]N3C(=N2)[C@H](C#N)C[C@H]3Cc2ccccc2)cc1
493	CC(C)(C)c1ccc(N2[C]N3C(=N2)[C@H](C#N)C[C@H]3c2ccccc2)cc1
494	CC(C)(C)c1ccc(N2[C]N3C(=N2)[C@H](C(F)(F)F)C[C@H]3C(C)(C)C)cc1
495	CC(C)(C)c1ccc(N2[C]N3C(=N2)[C@H](C(F)(F)F)C[C@H]3C(F)(c2ccccc2)c2ccccc2)cc1
496	CC(C)(C)c1ccc(N2[C]N3C(=N2)[C@H](C(F)(F)F)C[C@H]3C(O)(c2cc(C(F)(F)F)cc(C(F)(F)F)c2)c2cc(C(F)(F)F)cc(C(F)(F)F)c2)cc1
497	CC(C)(C)c1ccc(N2[C]N3C(=N2)[C@H](C(F)(F)F)C[C@H]3C(O)(c2ccccc2)c2ccccc2)cc1
498	CC(C)(C)c1ccc(N2[C]N3C(=N2)[C@H](C(F)(F)F)C[C@H]3C(O[Si](C)(C)C)(c2ccccc2)c2ccccc2)cc1
499	CC(C)(C)c1ccc(N2[C]N3C(=N2)[C@H](C(F)(F)F)C[C@H]3C(c2ccccc2)c2ccccc2)cc1
500	CC(C)(C)c1ccc(N2[C]N3C(=N2)[C@H](C(F)(F)F)C[C@H]3C2CCCCC2)cc1
501	CC(C)(C)c1ccc(N2[C]N3C(=N2)[C@H](C(F)(F)F)C[C@H]3COc2ccccc2)cc1
502	CC(C)(C)c1ccc(N2[C]N3C(=N2)[C@H](C(F)(F)F)C[C@H]3Cc2ccccc2)cc1
503	CC(C)(C)c1ccc(N2[C]N3C(=N2)[C@H](C(F)(F)F)C[C@H]3c2ccccc2)cc1
504	CC(C)(C)c1ccc(N2[C]N3C(=N2)[C@H](CCO)C[C@H]3C(C)(C)C)cc1
505	CC(C)(C)c1ccc(N2[C]N3C(=N2)[C@H](CCO)C[C@H]3C(F)(c2ccccc2)c2ccccc2)cc1
506	CC(C)(C)c1ccc(N2[C]N3C(=N2)[C@H](CCO)C[C@H]3C(O)(c2cc(C(F)(F)F)cc(C(F)(F)F)c2)c2cc(C(F)(F)F)cc(C(F)(F)F)c2)cc1
507	CC(C)(C)c1ccc(N2[C]N3C(=N2)[C@H](CCO)C[C@H]3C(O)(c2ccccc2)c2ccccc2)cc1
508	CC(C)(C)c1ccc(N2[C]N3C(=N2)[C@H](CCO)C[C@H]3C(O[Si](C)(C)C)(c2ccccc2)c2ccccc2)cc1
509	CC(C)(C)c1ccc(N2[C]N3C(=N2)[C@H](CCO)C[C@H]3C(c2ccccc2)c2ccccc2)cc1
510	CC(C)(C)c1ccc(N2[C]N3C(=N2)[C@H](CCO)C[C@H]3C2CCCCC2)cc1
511	CC(C)(C)c1ccc(N2[C]N3C(=N2)[C@H](CCO)C[C@H]3COc2ccccc2)cc1
512	CC(C)(C)c1ccc(N2[C]N3C(=N2)[C@H](CCO)C[C@H]3Cc2ccccc2)cc1
513	CC(C)(C)c1ccc(N2[C]N3C(=N2)[C@H](CCO)C[C@H]3c2ccccc2)cc1
514	CC(C)(C)c1ccc(N2[C]N3C(=N2)[C@H](Cc2ccccc2)C[C@H]3C(C)(C)C)cc1
515	CC(C)(C)c1ccc(N2[C]N3C(=N2)[C@H](Cc2ccccc2)C[C@H]3C(F)(c2ccccc2)c2ccccc2)cc1
516	CC(C)(C)c1ccc(N2[C]N3C(=N2)[C@H](Cc2ccccc2)C[C@H]3C(O)(c2cc(C(F)(F)F)cc(C(F)(F)F)c2)c2cc(C(F)(F)F)cc(C(F)(F)F)c2)cc1
517	CC(C)(C)c1ccc(N2[C]N3C(=N2)[C@H](Cc2ccccc2)C[C@H]3C(O)(c2ccccc2)c2ccccc2)cc1
518	CC(C)(C)c1ccc(N2[C]N3C(=N2)[C@H](Cc2ccccc2)C[C@H]3C(O[Si](C)(C)C)(c2ccccc2)c2ccccc2)cc1
519	CC(C)(C)c1ccc(N2[C]N3C(=N2)[C@H](Cc2ccccc2)C[C@H]3C(c2ccccc2)c2ccccc2)cc1
520	CC(C)(C)c1ccc(N2[C]N3C(=N2)[C@H](Cc2ccccc2)C[C@H]3C2CCCCC2)cc1
521	CC(C)(C)c1ccc(N2[C]N3C(=N2)[C@H](Cc2ccccc2)C[C@H]3COc2ccccc2)cc1
522	CC(C)(C)c1ccc(N2[C]N3C(=N2)[C@H](Cc2ccccc2)C[C@H]3Cc2ccccc2)cc1
523	CC(C)(C)c1ccc(N2[C]N3C(=N2)[C@H](Cc2ccccc2)C[C@H]3c2ccccc2)cc1
524	CC(C)(C)c1ccc(N2[C]N3C(=N2)[C@H](Cl)C[C@H]3C(C)(C)C)cc1
525	CC(C)(C)c1ccc(N2[C]N3C(=N2)[C@H](Cl)C[C@H]3C(F)(c2ccccc2)c2ccccc2)cc1
527	CC(C)(C)c1ccc(N2[C]N3C(=N2)[C@H](Cl)C[C@H]3C(O)(c2ccccc2)c2ccccc2)cc1
528	CC(C)(C)c1ccc(N2[C]N3C(=N2)[C@H](Cl)C[C@H]3C(O[Si](C)(C)C)(c2ccccc2)c2ccccc2)cc1
529	CC(C)(C)c1ccc(N2[C]N3C(=N2)[C@H](Cl)C[C@H]3C(c2ccccc2)c2ccccc2)cc1
530	CC(C)(C)c1ccc(N2[C]N3C(=N2)[C@H](Cl)C[C@H]3C2CCCCC2)cc1
531	CC(C)(C)c1ccc(N2[C]N3C(=N2)[C@H](Cl)C[C@H]3COc2ccccc2)cc1
532	CC(C)(C)c1ccc(N2[C]N3C(=N2)[C@H](Cl)C[C@H]3Cc2ccccc2)cc1
533	CC(C)(C)c1ccc(N2[C]N3C(=N2)[C@H](Cl)C[C@H]3c2ccccc2)cc1
534	CC(C)(C)c1ccc(N2[C]N3C(=N2)[C@H](F)C[C@H]3C(C)(C)C)cc1
535	CC(C)(C)c1ccc(N2[C]N3C(=N2)[C@H](F)C[C@H]3C(F)(c2ccccc2)c2ccccc2)cc1
537	CC(C)(C)c1ccc(N2[C]N3C(=N2)[C@H](F)C[C@H]3C(O)(c2ccccc2)c2ccccc2)cc1
538	CC(C)(C)c1ccc(N2[C]N3C(=N2)[C@H](F)C[C@H]3C(O[Si](C)(C)C)(c2ccccc2)c2ccccc2)cc1
539	CC(C)(C)c1ccc(N2[C]N3C(=N2)[C@H](F)C[C@H]3C(c2ccccc2)c2ccccc2)cc1
540	CC(C)(C)c1ccc(N2[C]N3C(=N2)[C@H](F)C[C@H]3C2CCCCC2)cc1
541	CC(C)(C)c1ccc(N2[C]N3C(=N2)[C@H](F)C[C@H]3COc2ccccc2)cc1
542	CC(C)(C)c1ccc(N2[C]N3C(=N2)[C@H](F)C[C@H]3Cc2ccccc2)cc1
543	CC(C)(C)c1ccc(N2[C]N3C(=N2)[C@H](F)C[C@H]3c2ccccc2)cc1
544	CC(C)(C)c1ccc(N2[C]N3C(=N2)[C@H](c2ccccc2)C[C@H]3C(C)(C)C)cc1
545	CC(C)(C)c1ccc(N2[C]N3C(=N2)[C@H](c2ccccc2)C[C@H]3C(F)(c2ccccc2)c2ccccc2)cc1
546	CC(C)(C)c1ccc(N2[C]N3C(=N2)[C@H](c2ccccc2)C[C@H]3C(O)(c2cc(C(F)(F)F)cc(C(F)(F)F)c2)c2cc(C(F)(F)F)cc(C(F)(F)F)c2)cc1
547	CC(C)(C)c1ccc(N2[C]N3C(=N2)[C@H](c2ccccc2)C[C@H]3C(O)(c2ccccc2)c2ccccc2)cc1
548	CC(C)(C)c1ccc(N2[C]N3C(=N2)[C@H](c2ccccc2)C[C@H]3C(O[Si](C)(C)C)(c2ccccc2)c2ccccc2)cc1
549	CC(C)(C)c1ccc(N2[C]N3C(=N2)[C@H](c2ccccc2)C[C@H]3C(c2ccccc2)c2ccccc2)cc1
550	CC(C)(C)c1ccc(N2[C]N3C(=N2)[C@H](c2ccccc2)C[C@H]3C2CCCCC2)cc1
551	CC(C)(C)c1ccc(N2[C]N3C(=N2)[C@H](c2ccccc2)C[C@H]3COc2ccccc2)cc1
552	CC(C)(C)c1ccc(N2[C]N3C(=N2)[C@H](c2ccccc2)C[C@H]3Cc2ccccc2)cc1
553	CC(C)(C)c1ccc(N2[C]N3C(=N2)[C@H](c2ccccc2)C[C@H]3c2ccccc2)cc1
554	CC(C)(C)c1ccc(N2[C]N3C=CC=CC3=N2)cc1
555	CC(C)(C)c1ccc(N2[C]N3CCCC3=N2)cc1
556	CC(C)(C)c1ccc(N2[C]N3CCOC3=N2)cc1
557	CC(C)(C)c1ccc(N2[C]N3CCOCC3=N2)cc1
558	CC(C)(C)c1ccc(N2[C]N3CC[C@@H](C#N)C3=N2)cc1
560	CC(C)(C)c1ccc(N2[C]N3CC[C@@H](CCO)C3=N2)cc1
561	CC(C)(C)c1ccc(N2[C]N3CC[C@@H](Cc4ccccc4)C3=N2)cc1
562	CC(C)(C)c1ccc(N2[C]N3CC[C@@H](Cl)C3=N2)cc1
563	CC(C)(C)c1ccc(N2[C]N3CC[C@@H](F)C3=N2)cc1
564	CC(C)(C)c1ccc(N2[C]N3CC[C@@H](c4ccccc4)C3=N2)cc1
565	CC(C)(C)c1ccc(N2[C]OC(C#N)=N2)cc1
566	CC(C)(C)c1ccc(N2[C]OC(C(F)(F)F)=N2)cc1
567	CC(C)(C)c1ccc(N2[C]OC(CCO)=N2)cc1
568	CC(C)(C)c1ccc(N2[C]OC(Cc3ccccc3)=N2)cc1
569	CC(C)(C)c1ccc(N2[C]OC(Cl)=N2)cc1
570	CC(C)(C)c1ccc(N2[C]OC(F)=N2)cc1
571	CC(C)(C)c1ccc(N2[C]OC(c3ccccc3)=N2)cc1
572	CC(C)(C)c1ccc(N2[C]OC=N2)cc1
573	CC(C)(C)c1ccc(N2[C]SC(C#N)=C2C#N)cc1
574	CC(C)(C)c1ccc(N2[C]SC(C(F)(F)F)=C2C(F)(F)F)cc1
575	CC(C)(C)c1ccc(N2[C]SC(CCO)=C2CCO)cc1
576	CC(C)(C)c1ccc(N2[C]SC(Cc3ccccc3)=C2Cc2ccccc2)cc1
577	CC(C)(C)c1ccc(N2[C]SC(Cl)=C2Cl)cc1
578	CC(C)(C)c1ccc(N2[C]SC(F)=C2F)cc1
579	CC(C)(C)c1ccc(N2[C]SC(c3ccccc3)=C2c2ccccc2)cc1
580	CC(C)(C)c1ccc(N2[C]SC=C2)cc1
581	CC(C)C1=C(C(C)C)N(C(C)C)[C]N1C(C)C
582	CC(C)C1=C(C(C)C)N(C(C)C)[C]S1
583	CC(C)C1=C(C(C)C)N(C)[C]N1C
584	CC(C)C1=C(C(C)C)N(C)[C]S1
585	CC(C)C1=C(C(C)C)N(C2CCCCC2)[C]N1C1CCCCC1
586	CC(C)C1=C(C(C)C)N(C2CCCCC2)[C]S1
587	CC(C)C1=C(C(C)C)N(Cc2ccccc2)[C]N1Cc1ccccc1
588	CC(C)C1=C(C(C)C)N(Cc2ccccc2)[C]S1
589	CC(C)C1=C(C(C)C)N(Cc2ccccn2)[C]N1Cc1ccccn1
590	CC(C)C1=C(C(C)C)N(Cc2ccccn2)[C]S1
591	CC(C)C1=C(C(C)C)N([C@H](C)C2CCCCC2)[C]N1[C@H](C)C1CCCCC1
592	CC(C)C1=C(C(C)C)N([C@H](C)C2CCCCC2)[C]S1
593	CC(C)C1=C(C(C)C)N([C@H](C)c2cccc3ccccc23)[C]N1[C@H](C)c1cccc2ccccc12
594	CC(C)C1=C(C(C)C)N([C@H](C)c2cccc3ccccc23)[C]S1
595	CC(C)C1=C(C(C)C)N([C@H](C)c2ccccc2)[C]N1[C@H](C)c1ccccc1
596	CC(C)C1=C(C(C)C)N([C@H](C)c2ccccc2)[C]S1
597	CC(C)C1=C(C(C)C)N(c2c(C(C)C)cc(C(C)C)cc2C(C)C)[C]N1c1c(C(C)C)cc(C(C)C)cc1C(C)C
598	CC(C)C1=C(C(C)C)N(c2c(C(C)C)cc(C(C)C)cc2C(C)C)[C]S1
599	CC(C)C1=C(C(C)C)N(c2c(Cl)cc(Cl)cc2Cl)[C]N1c1c(Cl)cc(Cl)cc1Cl
600	CC(C)C1=C(C(C)C)N(c2c(Cl)cc(Cl)cc2Cl)[C]S1
601	CC(C)C1=C(C(C)C)N(c2c(F)c(F)c(F)c(F)c2F)[C]N1c1c(F)c(F)c(F)c(F)c1F
602	CC(C)C1=C(C(C)C)N(c2c(F)c(F)c(F)c(F)c2F)[C]S1
603	CC(C)C1=C(C(C)C)N(c2c(F)cccc2F)[C]N1c1c(F)cccc1F
604	CC(C)C1=C(C(C)C)N(c2c(F)cccc2F)[C]S1
605	CC(C)C1=C(C(C)C)N(c2cc(C(C)(C)C)cc(C(C)(C)C)c2)[C]N1c1cc(C(C)(C)C)cc(C(C)(C)C)c1
606	CC(C)C1=C(C(C)C)N(c2cc(C(C)(C)C)cc(C(C)(C)C)c2)[C]S1
607	CC(C)C1=C(C(C)C)N(c2cc(C(F)(F)F)cc(C(F)(F)F)c2)[C]N1c1cc(C(F)(F)F)cc(C(F)(F)F)c1
608	CC(C)C1=C(C(C)C)N(c2cc(C(F)(F)F)cc(C(F)(F)F)c2)[C]S1
609	CC(C)C1=C(C(C)C)N(c2cc(Cl)cc(Cl)c2)[C]N1c1cc(Cl)cc(Cl)c1
610	CC(C)C1=C(C(C)C)N(c2cc(Cl)cc(Cl)c2)[C]S1
611	CC(C)C1=C(C(C)C)N(c2cc(F)c(F)c(F)c2)[C]N1c1cc(F)c(F)c(F)c1
612	CC(C)C1=C(C(C)C)N(c2cc(F)c(F)c(F)c2)[C]S1
613	CC(C)C1=C(C(C)C)N(c2cc(F)cc(F)c2)[C]N1c1cc(F)cc(F)c1
614	CC(C)C1=C(C(C)C)N(c2cc(F)cc(F)c2)[C]S1
615	CC(C)C1=C(C(C)C)N(c2cc([N+](=O)[O-])cc([N+](=O)[O-])c2)[C]N1c1cc([N+](=O)[O-])cc([N+](=O)[O-])c1
616	CC(C)C1=C(C(C)C)N(c2cc([N+](=O)[O-])cc([N+](=O)[O-])c2)[C]S1
617	CC(C)C1=C(C(C)C)N(c2ccc(Br)cc2)[C]N1c1ccc(Br)cc1
618	CC(C)C1=C(C(C)C)N(c2ccc(Br)cc2)[C]S1
619	CC(C)C1=C(C(C)C)N(c2ccc(C#N)cc2)[C]N1c1ccc(C#N)cc1
620	CC(C)C1=C(C(C)C)N(c2ccc(C#N)cc2)[C]S1
621	CC(C)C1=C(C(C)C)N(c2ccc(C(C)(C)C)cc2)[C]N1c1ccc(C(C)(C)C)cc1
622	CC(C)C1=C(C(C)C)N(c2ccc(C(C)(C)C)cc2)[C]S1
623	CC(C)C1=C(C(C)C)N(c2ccc(C(F)(F)F)cc2)[C]N1c1ccc(C(F)(F)F)cc1
624	CC(C)C1=C(C(C)C)N(c2ccc(C(F)(F)F)cc2)[C]S1
625	CC(C)C1=C(C(C)C)N(c2ccc(Cl)cc2)[C]N1c1ccc(Cl)cc1
627	CC(C)C1=C(C(C)C)N(c2ccc(F)cc2)[C]N1c1ccc(F)cc1
628	CC(C)C1=C(C(C)C)N(c2ccc(F)cc2)[C]S1
629	CC(C)C1=C(C(C)C)N(c2ccc(O)cc2)[C]N1c1ccc(O)cc1
630	CC(C)C1=C(C(C)C)N(c2ccc(O)cc2)[C]S1
631	CC(C)C1=C(C(C)C)N(c2ccc([N+](=O)[O-])cc2)[C]N1c1ccc([N+](=O)[O-])cc1
632	CC(C)C1=C(C(C)C)N(c2ccc([N+](=O)[O-])cc2)[C]S1
633	CC(C)C1=C(C(C)C)N(c2ccccc2)[C]N1c1ccccc1
634	CC(C)C1=C(C(C)C)N(c2ccccc2)[C]S1
635	CC(C)C1=C2CO[C@H]3Cc4ccccc4[C@H]3N2[C]N1C
636	CC(C)C1=C2CO[C@H]3Cc4ccccc4[C@H]3N2[C]N1C(C)C
637	CC(C)C1=C2CO[C@H]3Cc4ccccc4[C@H]3N2[C]N1C1CCCCC1
638	CC(C)C1=C2CO[C@H]3Cc4ccccc4[C@H]3N2[C]N1Cc1ccccc1
639	CC(C)C1=C2CO[C@H]3Cc4ccccc4[C@H]3N2[C]N1Cc1ccccn1
640	CC(C)C1=C2CO[C@H]3Cc4ccccc4[C@H]3N2[C]N1[C@H](C)C1CCCCC1
641	CC(C)C1=C2CO[C@H]3Cc4ccccc4[C@H]3N2[C]N1[C@H](C)c1cccc2ccccc12
642	CC(C)C1=C2CO[C@H]3Cc4ccccc4[C@H]3N2[C]N1[C@H](C)c1ccccc1
643	CC(C)C1=C2CO[C@H]3Cc4ccccc4[C@H]3N2[C]N1c1c(C(C)C)cc(C(C)C)cc1C(C)C
644	CC(C)C1=C2CO[C@H]3Cc4ccccc4[C@H]3N2[C]N1c1c(Cl)cc(Cl)cc1Cl
645	CC(C)C1=C2CO[C@H]3Cc4ccccc4[C@H]3N2[C]N1c1c(F)c(F)c(F)c(F)c1F
646	CC(C)C1=C2CO[C@H]3Cc4ccccc4[C@H]3N2[C]N1c1c(F)cccc1F
647	CC(C)C1=C2CO[C@H]3Cc4ccccc4[C@H]3N2[C]N1c1cc(C(C)(C)C)cc(C(C)(C)C)c1
648	CC(C)C1=C2CO[C@H]3Cc4ccccc4[C@H]3N2[C]N1c1cc(C(F)(F)F)cc(C(F)(F)F)c1
649	CC(C)C1=C2CO[C@H]3Cc4ccccc4[C@H]3N2[C]N1c1cc(Cl)cc(Cl)c1
650	CC(C)C1=C2CO[C@H]3Cc4ccccc4[C@H]3N2[C]N1c1cc(F)c(F)c(F)c1
651	CC(C)C1=C2CO[C@H]3Cc4ccccc4[C@H]3N2[C]N1c1cc(F)cc(F)c1
652	CC(C)C1=C2CO[C@H]3Cc4ccccc4[C@H]3N2[C]N1c1cc([N+](=O)[O-])cc([N+](=O)[O-])c1
653	CC(C)C1=C2CO[C@H]3Cc4ccccc4[C@H]3N2[C]N1c1ccc(Br)cc1
654	CC(C)C1=C2CO[C@H]3Cc4ccccc4[C@H]3N2[C]N1c1ccc(C#N)cc1
655	CC(C)C1=C2CO[C@H]3Cc4ccccc4[C@H]3N2[C]N1c1ccc(C(C)(C)C)cc1
656	CC(C)C1=C2CO[C@H]3Cc4ccccc4[C@H]3N2[C]N1c1ccc(C(F)(F)F)cc1
657	CC(C)C1=C2CO[C@H]3Cc4ccccc4[C@H]3N2[C]N1c1ccc(Cl)cc1
658	CC(C)C1=C2CO[C@H]3Cc4ccccc4[C@H]3N2[C]N1c1ccc(F)cc1
659	CC(C)C1=C2CO[C@H]3Cc4ccccc4[C@H]3N2[C]N1c1ccc(O)cc1
660	CC(C)C1=C2CO[C@H]3Cc4ccccc4[C@H]3N2[C]N1c1ccc([N+](=O)[O-])cc1
661	CC(C)C1=C2CO[C@H]3Cc4ccccc4[C@H]3N2[C]N1c1ccccc1
662	CC(C)C1=NN(C(C)C)[C]N1C(C)C
663	CC(C)C1=NN(C(C)C)[C]O1
664	CC(C)C1=NN(C)[C]N1C
665	CC(C)C1=NN(C)[C]O1
666	CC(C)C1=NN(C2CCCCC2)[C]N1C1CCCCC1
667	CC(C)C1=NN(C2CCCCC2)[C]O1
668	CC(C)C1=NN(Cc2ccccc2)[C]N1Cc1ccccc1
669	CC(C)C1=NN(Cc2ccccc2)[C]O1
670	CC(C)C1=NN(Cc2ccccn2)[C]N1Cc1ccccn1
671	CC(C)C1=NN(Cc2ccccn2)[C]O1
672	CC(C)C1=NN([C@H](C)C2CCCCC2)[C]N1[C@H](C)C1CCCCC1
673	CC(C)C1=NN([C@H](C)C2CCCCC2)[C]O1
674	CC(C)C1=NN([C@H](C)c2cccc3ccccc23)[C]N1[C@H](C)c1cccc2ccccc12
676	CC(C)C1=NN([C@H](C)c2ccccc2)[C]N1[C@H](C)c1ccccc1
677	CC(C)C1=NN([C@H](C)c2ccccc2)[C]O1
678	CC(C)C1=NN(c2c(C(C)C)cc(C(C)C)cc2C(C)C)[C]N1c1c(C(C)C)cc(C(C)C)cc1C(C)C
679	CC(C)C1=NN(c2c(C(C)C)cc(C(C)C)cc2C(C)C)[C]O1
680	CC(C)C1=NN(c2c(Cl)cc(Cl)cc2Cl)[C]N1c1c(Cl)cc(Cl)cc1Cl
681	CC(C)C1=NN(c2c(Cl)cc(Cl)cc2Cl)[C]O1
682	CC(C)C1=NN(c2c(F)c(F)c(F)c(F)c2F)[C]N1c1c(F)c(F)c(F)c(F)c1F
683	CC(C)C1=NN(c2c(F)c(F)c(F)c(F)c2F)[C]O1
684	CC(C)C1=NN(c2c(F)cccc2F)[C]N1c1c(F)cccc1F
686	CC(C)C1=NN(c2cc(C(C)(C)C)cc(C(C)(C)C)c2)[C]N1c1cc(C(C)(C)C)cc(C(C)(C)C)c1
687	CC(C)C1=NN(c2cc(C(C)(C)C)cc(C(C)(C)C)c2)[C]O1
688	CC(C)C1=NN(c2cc(C(F)(F)F)cc(C(F)(F)F)c2)[C]N1c1cc(C(F)(F)F)cc(C(F)(F)F)c1
689	CC(C)C1=NN(c2cc(C(F)(F)F)cc(C(F)(F)F)c2)[C]O1
690	CC(C)C1=NN(c2cc(Cl)cc(Cl)c2)[C]N1c1cc(Cl)cc(Cl)c1
691	CC(C)C1=NN(c2cc(Cl)cc(Cl)c2)[C]O1
692	CC(C)C1=NN(c2cc(F)c(F)c(F)c2)[C]N1c1cc(F)c(F)c(F)c1
693	CC(C)C1=NN(c2cc(F)c(F)c(F)c2)[C]O1
694	CC(C)C1=NN(c2cc(F)cc(F)c2)[C]N1c1cc(F)cc(F)c1
695	CC(C)C1=NN(c2cc(F)cc(F)c2)[C]O1
696	CC(C)C1=NN(c2cc([N+](=O)[O-])cc([N+](=O)[O-])c2)[C]N1c1cc([N+](=O)[O-])cc([N+](=O)[O-])c1
697	CC(C)C1=NN(c2cc([N+](=O)[O-])cc([N+](=O)[O-])c2)[C]O1
698	CC(C)C1=NN(c2ccc(Br)cc2)[C]N1c1ccc(Br)cc1
699	CC(C)C1=NN(c2ccc(Br)cc2)[C]O1
700	CC(C)C1=NN(c2ccc(C#N)cc2)[C]N1c1ccc(C#N)cc1
701	CC(C)C1=NN(c2ccc(C#N)cc2)[C]O1
702	CC(C)C1=NN(c2ccc(C(C)(C)C)cc2)[C]N1c1ccc(C(C)(C)C)cc1
703	CC(C)C1=NN(c2ccc(C(C)(C)C)cc2)[C]O1
704	CC(C)C1=NN(c2ccc(C(F)(F)F)cc2)[C]N1c1ccc(C(F)(F)F)cc1
705	CC(C)C1=NN(c2ccc(C(F)(F)F)cc2)[C]O1
706	CC(C)C1=NN(c2ccc(Cl)cc2)[C]N1c1ccc(Cl)cc1
707	CC(C)C1=NN(c2ccc(Cl)cc2)[C]O1
708	CC(C)C1=NN(c2ccc(F)cc2)[C]N1c1ccc(F)cc1
709	CC(C)C1=NN(c2ccc(F)cc2)[C]O1
710	CC(C)C1=NN(c2ccc(O)cc2)[C]N1c1ccc(O)cc1
711	CC(C)C1=NN(c2ccc(O)cc2)[C]O1
712	CC(C)C1=NN(c2ccc([N+](=O)[O-])cc2)[C]N1c1ccc([N+](=O)[O-])cc1
713	CC(C)C1=NN(c2ccc([N+](=O)[O-])cc2)[C]O1
714	CC(C)C1=NN(c2ccccc2)[C]N1c1ccccc1
715	CC(C)C1=NN(c2ccccc2)[C]O1
716	CC(C)N1[C]N(C(C)C)C(C#N)=C1C#N
717	CC(C)N1[C]N(C(C)C)C(C#N)=N1
718	CC(C)N1[C]N(C(C)C)C(C(F)(F)F)=C1C(F)(F)F
719	CC(C)N1[C]N(C(C)C)C(C(F)(F)F)=N1
720	CC(C)N1[C]N(C(C)C)C(CCO)=C1CCO
721	CC(C)N1[C]N(C(C)C)C(CCO)=N1
722	CC(C)N1[C]N(C(C)C)C(Cc2ccccc2)=C1Cc1ccccc1
723	CC(C)N1[C]N(C(C)C)C(Cc2ccccc2)=N1
724	CC(C)N1[C]N(C(C)C)C(Cl)=C1Cl
725	CC(C)N1[C]N(C(C)C)C(Cl)=N1
726	CC(C)N1[C]N(C(C)C)C(F)=C1F
727	CC(C)N1[C]N(C(C)C)C(F)=N1
728	CC(C)N1[C]N(C(C)C)C(c2ccccc2)=C1c1ccccc1
729	CC(C)N1[C]N(C(C)C)C(c2ccccc2)=N1
730	CC(C)N1[C]N(C(C)C)C=C1
731	CC(C)N1[C]N(C(C)C)CC1
732	CC(C)N1[C]N(C(C)C)N=C1
733	CC(C)N1[C]N(C(C)C)N=N1
734	CC(C)N1[C]N(C(C)C)[C@@H](C#N)[C@@H]1C#N
735	CC(C)N1[C]N(C(C)C)[C@@H](C(F)(F)F)[C@@H]1C(F)(F)F
736	CC(C)N1[C]N(C(C)C)[C@@H](C)[C@@H]1C
737	CC(C)N1[C]N(C(C)C)[C@@H](CCO)[C@@H]1CCO
738	CC(C)N1[C]N(C(C)C)[C@@H](Cc2ccccc2)[C@@H]1Cc1ccccc1
739	CC(C)N1[C]N(C(C)C)[C@@H](Cl)[C@@H]1Cl
740	CC(C)N1[C]N(C(C)C)[C@@H](F)[C@@H]1F
741	CC(C)N1[C]N(C(C)C)[C@@H](c2ccccc2)[C@@H]1c1ccccc1
742	CC(C)N1[C]N(C(C)C)[C@@H]2CCCC[C@H]21
743	CC(C)N1[C]N(C(C)C)c2ccccc21
744	CC(C)N1[C]N2C(=C1)CO[C@H]1Cc3ccccc3[C@H]12
745	CC(C)N1[C]N2C(=C1C#N)CO[C@H]1Cc3ccccc3[C@H]12
746	CC(C)N1[C]N2C(=C1C(F)(F)F)CO[C@H]1Cc3ccccc3[C@H]12
747	CC(C)N1[C]N2C(=C1CCO)CO[C@H]1Cc3ccccc3[C@H]12
748	CC(C)N1[C]N2C(=C1Cc1ccccc1)CO[C@H]1Cc3ccccc3[C@H]12
749	CC(C)N1[C]N2C(=C1Cl)CO[C@H]1Cc3ccccc3[C@H]12
750	CC(C)N1[C]N2C(=C1F)CO[C@H]1Cc3ccccc3[C@H]12
751	CC(C)N1[C]N2C(=C1c1ccccc1)CO[C@H]1Cc3ccccc3[C@H]12
752	CC(C)N1[C]N2C(=N1)CC[C@H]2C
753	CC(C)N1[C]N2C(=N1)CC[C@H]2C(C)(C)C
754	CC(C)N1[C]N2C(=N1)CC[C@H]2C(F)(c1ccccc1)c1ccccc1
755	CC(C)N1[C]N2C(=N1)CC[C@H]2C(O)(c1cc(C(F)(F)F)cc(C(F)(F)F)c1)c1cc(C(F)(F)F)cc(C(F)(F)F)c1
756	CC(C)N1[C]N2C(=N1)CC[C@H]2C(O)(c1ccccc1)c1ccccc1
757	CC(C)N1[C]N2C(=N1)CC[C@H]2C(O[Si](C)(C)C)(c1ccccc1)c1ccccc1
758	CC(C)N1[C]N2C(=N1)CC[C@H]2C(c1ccccc1)c1ccccc1
759	CC(C)N1[C]N2C(=N1)CC[C@H]2C1CCCCC1
760	CC(C)N1[C]N2C(=N1)CC[C@H]2CO[Si](C(C)C)(C(C)C)C(C)C
761	CC(C)N1[C]N2C(=N1)CC[C@H]2COc1ccccc1
762	CC(C)N1[C]N2C(=N1)CC[C@H]2Cc1ccccc1
763	CC(C)N1[C]N2C(=N1)CC[C@H]2c1ccccc1
764	CC(C)N1[C]N2C(=N1)COC[C@@H]2C
765	CC(C)N1[C]N2C(=N1)COC[C@@H]2C(C)(C)C
766	CC(C)N1[C]N2C(=N1)COC[C@@H]2C(F)(c1ccccc1)c1ccccc1
767	CC(C)N1[C]N2C(=N1)COC[C@@H]2C(O)(c1cc(C(F)(F)F)cc(C(F)(F)F)c1)c1cc(C(F)(F)F)cc(C(F)(F)F)c1
768	CC(C)N1[C]N2C(=N1)COC[C@@H]2C(O)(c1ccccc1)c1ccccc1
769	CC(C)N1[C]N2C(=N1)COC[C@@H]2C(O[Si](C)(C)C)(c1ccccc1)c1ccccc1
770	CC(C)N1[C]N2C(=N1)COC[C@@H]2C(c1ccccc1)c1ccccc1
771	CC(C)N1[C]N2C(=N1)COC[C@@H]2C1CCCCC1
772	CC(C)N1[C]N2C(=N1)COC[C@@H]2CO[Si](C(C)C)(C(C)C)C(C)C
774	CC(C)N1[C]N2C(=N1)COC[C@@H]2Cc1ccccc1
775	CC(C)N1[C]N2C(=N1)COC[C@@H]2c1ccccc1
776	CC(C)N1[C]N2C(=N1)CO[C@H]1Cc3ccccc3[C@H]12
777	CC(C)N1[C]N2C(=N1)C[C@@H]1CCc3ccccc3[C@@H]12
778	CC(C)N1[C]N2C(=N1)OC[C@@H]2C
779	CC(C)N1[C]N2C(=N1)OC[C@@H]2C(C)(C)C
780	CC(C)N1[C]N2C(=N1)OC[C@@H]2C(F)(c1ccccc1)c1ccccc1
781	CC(C)N1[C]N2C(=N1)OC[C@@H]2C(O)(c1cc(C(F)(F)F)cc(C(F)(F)F)c1)c1cc(C(F)(F)F)cc(C(F)(F)F)c1
782	CC(C)N1[C]N2C(=N1)OC[C@@H]2C(O)(c1ccccc1)c1ccccc1
783	CC(C)N1[C]N2C(=N1)OC[C@@H]2C(O[Si](C)(C)C)(c1ccccc1)c1ccccc1
784	CC(C)N1[C]N2C(=N1)OC[C@@H]2C(c1ccccc1)c1ccccc1
785	CC(C)N1[C]N2C(=N1)OC[C@@H]2C1CCCCC1
786	CC(C)N1[C]N2C(=N1)OC[C@@H]2CO[Si](C(C)C)(C(C)C)C(C)C
787	CC(C)N1[C]N2C(=N1)OC[C@@H]2COc1ccccc1
788	CC(C)N1[C]N2C(=N1)OC[C@@H]2Cc1ccccc1
789	CC(C)N1[C]N2C(=N1)OC[C@@H]2c1ccccc1
791	CC(C)N1[C]N2C(=N1)[C@H](C#N)C[C@H]2C(C)(C)C
792	CC(C)N1[C]N2C(=N1)[C@H](C#N)C[C@H]2C(F)(c1ccccc1)c1ccccc1
793	CC(C)N1[C]N2C(=N1)[C@H](C#N)C[C@H]2C(O)(c1cc(C(F)(F)F)cc(C(F)(F)F)c1)c1cc(C(F)(F)F)cc(C(F)(F)F)c1
794	CC(C)N1[C]N2C(=N1)[C@H](C#N)C[C@H]2C(O)(c1ccccc1)c1ccccc1
795	CC(C)N1[C]N2C(=N1)[C@H](C#N)C[C@H]2C(O[Si](C)(C)C)(c1ccccc1)c1ccccc1
796	CC(C)N1[C]N2C(=N1)[C@H](C#N)C[C@H]2C(c1ccccc1)c1ccccc1
797	CC(C)N1[C]N2C(=N1)[C@H](C#N)C[C@H]2C1CCCCC1
798	CC(C)N1[C]N2C(=N1)[C@H](C#N)C[C@H]2CO[Si](C(C)C)(C(C)C)C(C)C
799	CC(C)N1[C]N2C(=N1)[C@H](C#N)C[C@H]2COc1ccccc1
800	CC(C)N1[C]N2C(=N1)[C@H](C#N)C[C@H]2Cc1ccccc1
801	CC(C)N1[C]N2C(=N1)[C@H](C#N)C[C@H]2c1ccccc1
802	CC(C)N1[C]N2C(=N1)[C@H](C(F)(F)F)C[C@H]2C
803	CC(C)N1[C]N2C(=N1)[C@H](C(F)(F)F)C[C@H]2C(C)(C)C
804	CC(C)N1[C]N2C(=N1)[C@H](C(F)(F)F)C[C@H]2C(F)(c1ccccc1)c1ccccc1
805	CC(C)N1[C]N2C(=N1)[C@H](C(F)(F)F)C[C@H]2C(O)(c1cc(C(F)(F)F)cc(C(F)(F)F)c1)c1cc(C(F)(F)F)cc(C(F)(F)F)c1
806	CC(C)N1[C]N2C(=N1)[C@H](C(F)(F)F)C[C@H]2C(O)(c1ccccc1)c1ccccc1
807	CC(C)N1[C]N2C(=N1)[C@H](C(F)(F)F)C[C@H]2C(O[Si](C)(C)C)(c1ccccc1)c1ccccc1
808	CC(C)N1[C]N2C(=N1)[C@H](C(F)(F)F)C[C@H]2C(c1ccccc1)c1ccccc1
809	CC(C)N1[C]N2C(=N1)[C@H](C(F)(F)F)C[C@H]2C1CCCCC1
810	CC(C)N1[C]N2C(=N1)[C@H](C(F)(F)F)C[C@H]2CO[Si](C(C)C)(C(C)C)C(C)C
811	CC(C)N1[C]N2C(=N1)[C@H](C(F)(F)F)C[C@H]2COc1ccccc1
812	CC(C)N1[C]N2C(=N1)[C@H](C(F)(F)F)C[C@H]2Cc1ccccc1
813	CC(C)N1[C]N2C(=N1)[C@H](C(F)(F)F)C[C@H]2c1ccccc1
814	CC(C)N1[C]N2C(=N1)[C@H](C)C[C@H]2C
815	CC(C)N1[C]N2C(=N1)[C@H](C)C[C@H]2C(C)(C)C
816	CC(C)N1[C]N2C(=N1)[C@H](C)C[C@H]2C(F)(c1ccccc1)c1ccccc1
817	CC(C)N1[C]N2C(=N1)[C@H](C)C[C@H]2C(O)(c1cc(C(F)(F)F)cc(C(F)(F)F)c1)c1cc(C(F)(F)F)cc(C(F)(F)F)c1
818	CC(C)N1[C]N2C(=N1)[C@H](C)C[C@H]2C(O)(c1ccccc1)c1ccccc1
819	CC(C)N1[C]N2C(=N1)[C@H](C)C[C@H]2C(O[Si](C)(C)C)(c1ccccc1)c1ccccc1
820	CC(C)N1[C]N2C(=N1)[C@H](C)C[C@H]2C(c1ccccc1)c1ccccc1
821	CC(C)N1[C]N2C(=N1)[C@H](C)C[C@H]2C1CCCCC1
822	CC(C)N1[C]N2C(=N1)[C@H](C)C[C@H]2CO[Si](C(C)C)(C(C)C)C(C)C
823	CC(C)N1[C]N2C(=N1)[C@H](C)C[C@H]2COc1ccccc1
824	CC(C)N1[C]N2C(=N1)[C@H](C)C[C@H]2Cc1ccccc1
825	CC(C)N1[C]N2C(=N1)[C@H](C)C[C@H]2c1ccccc1
826	CC(C)N1[C]N2C(=N1)[C@H](CCO)C[C@H]2C
827	CC(C)N1[C]N2C(=N1)[C@H](CCO)C[C@H]2C(C)(C)C
828	CC(C)N1[C]N2C(=N1)[C@H](CCO)C[C@H]2C(F)(c1ccccc1)c1ccccc1
829	CC(C)N1[C]N2C(=N1)[C@H](CCO)C[C@H]2C(O)(c1cc(C(F)(F)F)cc(C(F)(F)F)c1)c1cc(C(F)(F)F)cc(C(F)(F)F)c1
830	CC(C)N1[C]N2C(=N1)[C@H](CCO)C[C@H]2C(O)(c1ccccc1)c1ccccc1
831	CC(C)N1[C]N2C(=N1)[C@H](CCO)C[C@H]2C(O[Si](C)(C)C)(c1ccccc1)c1ccccc1
832	CC(C)N1[C]N2C(=N1)[C@H](CCO)C[C@H]2C(c1ccccc1)c1ccccc1
833	CC(C)N1[C]N2C(=N1)[C@H](CCO)C[C@H]2C1CCCCC1
834	CC(C)N1[C]N2C(=N1)[C@H](CCO)C[C@H]2CO[Si](C(C)C)(C(C)C)C(C)C
835	CC(C)N1[C]N2C(=N1)[C@H](CCO)C[C@H]2COc1ccccc1
836	CC(C)N1[C]N2C(=N1)[C@H](CCO)C[C@H]2Cc1ccccc1
837	CC(C)N1[C]N2C(=N1)[C@H](CCO)C[C@H]2c1ccccc1
838	CC(C)N1[C]N2C(=N1)[C@H](Cc1ccccc1)C[C@H]2C
840	CC(C)N1[C]N2C(=N1)[C@H](Cc1ccccc1)C[C@H]2C(F)(c1ccccc1)c1ccccc1
841	CC(C)N1[C]N2C(=N1)[C@H](Cc1ccccc1)C[C@H]2C(O)(c1cc(C(F)(F)F)cc(C(F)(F)F)c1)c1cc(C(F)(F)F)cc(C(F)(F)F)c1
842	CC(C)N1[C]N2C(=N1)[C@H](Cc1ccccc1)C[C@H]2C(O)(c1ccccc1)c1ccccc1
843	CC(C)N1[C]N2C(=N1)[C@H](Cc1ccccc1)C[C@H]2C(O[Si](C)(C)C)(c1ccccc1)c1ccccc1
844	CC(C)N1[C]N2C(=N1)[C@H](Cc1ccccc1)C[C@H]2C(c1ccccc1)c1ccccc1
845	CC(C)N1[C]N2C(=N1)[C@H](Cc1ccccc1)C[C@H]2C1CCCCC1
846	CC(C)N1[C]N2C(=N1)[C@H](Cc1ccccc1)C[C@H]2CO[Si](C(C)C)(C(C)C)C(C)C
847	CC(C)N1[C]N2C(=N1)[C@H](Cc1ccccc1)C[C@H]2COc1ccccc1
848	CC(C)N1[C]N2C(=N1)[C@H](Cc1ccccc1)C[C@H]2Cc1ccccc1
849	CC(C)N1[C]N2C(=N1)[C@H](Cc1ccccc1)C[C@H]2c1ccccc1
850	CC(C)N1[C]N2C(=N1)[C@H](Cl)C[C@H]2C
851	CC(C)N1[C]N2C(=N1)[C@H](Cl)C[C@H]2C(C)(C)C
852	CC(C)N1[C]N2C(=N1)[C@H](Cl)C[C@H]2C(F)(c1ccccc1)c1ccccc1
853	CC(C)N1[C]N2C(=N1)[C@H](Cl)C[C@H]2C(O)(c1cc(C(F)(F)F)cc(C(F)(F)F)c1)c1cc(C(F)(F)F)cc(C(F)(F)F)c1
854	CC(C)N1[C]N2C(=N1)[C@H](Cl)C[C@H]2C(O)(c1ccccc1)c1ccccc1
856	CC(C)N1[C]N2C(=N1)[C@H](Cl)C[C@H]2C(c1ccccc1)c1ccccc1
857	CC(C)N1[C]N2C(=N1)[C@H](Cl)C[C@H]2C1CCCCC1
858	CC(C)N1[C]N2C(=N1)[C@H](Cl)C[C@H]2CO[Si](C(C)C)(C(C)C)C(C)C
859	CC(C)N1[C]N2C(=N1)[C@H](Cl)C[C@H]2COc1ccccc1
860	CC(C)N1[C]N2C(=N1)[C@H](Cl)C[C@H]2Cc1ccccc1
861	CC(C)N1[C]N2C(=N1)[C@H](Cl)C[C@H]2c1ccccc1
862	CC(C)N1[C]N2C(=N1)[C@H](F)C[C@H]2C
863	CC(C)N1[C]N2C(=N1)[C@H](F)C[C@H]2C(C)(C)C
864	CC(C)N1[C]N2C(=N1)[C@H](F)C[C@H]2C(F)(c1ccccc1)c1ccccc1
865	CC(C)N1[C]N2C(=N1)[C@H](F)C[C@H]2C(O)(c1cc(C(F)(F)F)cc(C(F)(F)F)c1)c1cc(C(F)(F)F)cc(C(F)(F)F)c1
866	CC(C)N1[C]N2C(=N1)[C@H](F)C[C@H]2C(O)(c1ccccc1)c1ccccc1
867	CC(C)N1[C]N2C(=N1)[C@H](F)C[C@H]2C(O[Si](C)(C)C)(c1ccccc1)c1ccccc1
868	CC(C)N1[C]N2C(=N1)[C@H](F)C[C@H]2C(c1ccccc1)c1ccccc1
869	CC(C)N1[C]N2C(=N1)[C@H](F)C[C@H]2C1CCCCC1
870	CC(C)N1[C]N2C(=N1)[C@H](F)C[C@H]2CO[Si](C(C)C)(C(C)C)C(C)C
871	CC(C)N1[C]N2C(=N1)[C@H](F)C[C@H]2COc1ccccc1
872	CC(C)N1[C]N2C(=N1)[C@H](F)C[C@H]2Cc1ccccc1
873	CC(C)N1[C]N2C(=N1)[C@H](F)C[C@H]2c1ccccc1
874	CC(C)N1[C]N2C(=N1)[C@H](c1ccccc1)C[C@H]2C
875	CC(C)N1[C]N2C(=N1)[C@H](c1ccccc1)C[C@H]2C(C)(C)C
876	CC(C)N1[C]N2C(=N1)[C@H](c1ccccc1)C[C@H]2C(F)(c1ccccc1)c1ccccc1
877	CC(C)N1[C]N2C(=N1)[C@H](c1ccccc1)C[C@H]2C(O)(c1cc(C(F)(F)F)cc(C(F)(F)F)c1)c1cc(C(F)(F)F)cc(C(F)(F)F)c1
878	CC(C)N1[C]N2C(=N1)[C@H](c1ccccc1)C[C@H]2C(O)(c1ccccc1)c1ccccc1
879	CC(C)N1[C]N2C(=N1)[C@H](c1ccccc1)C[C@H]2C(O[Si](C)(C)C)(c1ccccc1)c1ccccc1
880	CC(C)N1[C]N2C(=N1)[C@H](c1ccccc1)C[C@H]2C(c1ccccc1)c1ccccc1
881	CC(C)N1[C]N2C(=N1)[C@H](c1ccccc1)C[C@H]2C1CCCCC1
882	CC(C)N1[C]N2C(=N1)[C@H](c1ccccc1)C[C@H]2CO[Si](C(C)C)(C(C)C)C(C)C
883	CC(C)N1[C]N2C(=N1)[C@H](c1ccccc1)C[C@H]2COc1ccccc1
884	CC(C)N1[C]N2C(=N1)[C@H](c1ccccc1)C[C@H]2Cc1ccccc1
885	CC(C)N1[C]N2C(=N1)[C@H](c1ccccc1)C[C@H]2c1ccccc1
886	CC(C)N1[C]N2C=CC=CC2=N1
887	CC(C)N1[C]N2CCCC2=N1
888	CC(C)N1[C]N2CCOC2=N1
889	CC(C)N1[C]N2CCOCC2=N1
890	CC(C)N1[C]N2CC[C@@H](C#N)C2=N1
891	CC(C)N1[C]N2CC[C@@H](C(F)(F)F)C2=N1
892	CC(C)N1[C]N2CC[C@@H](C)C2=N1
893	CC(C)N1[C]N2CC[C@@H](CCO)C2=N1
894	CC(C)N1[C]N2CC[C@@H](Cc3ccccc3)C2=N1
895	CC(C)N1[C]N2CC[C@@H](Cl)C2=N1
896	CC(C)N1[C]N2CC[C@@H](F)C2=N1
897	CC(C)N1[C]N2CC[C@@H](c3ccccc3)C2=N1
898	CC(C)N1[C]OC(C#N)=N1
900	CC(C)N1[C]OC(CCO)=N1
901	CC(C)N1[C]OC(Cc2ccccc2)=N1
902	CC(C)N1[C]OC(Cl)=N1
903	CC(C)N1[C]OC(F)=N1
904	CC(C)N1[C]OC(c2ccccc2)=N1
905	CC(C)N1[C]OC=N1
906	CC(C)N1[C]SC(C#N)=C1C#N
907	CC(C)N1[C]SC(C(F)(F)F)=C1C(F)(F)F
908	CC(C)N1[C]SC(CCO)=C1CCO
909	CC(C)N1[C]SC(Cc2ccccc2)=C1Cc1ccccc1
910	CC(C)N1[C]SC(Cl)=C1Cl
911	CC(C)N1[C]SC(F)=C1F
912	CC(C)N1[C]SC(c2ccccc2)=C1c1ccccc1
913	CC(C)N1[C]SC=C1
914	CC(C)[C@@H]1CCC2=NN(C(C)C)[C]N21
915	CC(C)[C@@H]1CCC2=NN(C)[C]N21
916	CC(C)[C@@H]1CCC2=NN(C3CCCCC3)[C]N21
917	CC(C)[C@@H]1CCC2=NN(Cc3ccccc3)[C]N21
918	CC(C)[C@@H]1CCC2=NN(Cc3ccccn3)[C]N21
919	CC(C)[C@@H]1CCC2=NN([C@H](C)C3CCCCC3)[C]N21
920	CC(C)[C@@H]1CCC2=NN([C@H](C)c3cccc4ccccc34)[C]N21
921	CC(C)[C@@H]1CCC2=NN([C@H](C)c3ccccc3)[C]N21
922	CC(C)[C@@H]1CCC2=NN(c3c(Cl)cc(Cl)cc3Cl)[C]N21
923	CC(C)[C@@H]1CCC2=NN(c3c(F)c(F)c(F)c(F)c3F)[C]N21
924	CC(C)[C@@H]1CCC2=NN(c3c(F)cccc3F)[C]N21
925	CC(C)[C@@H]1CCC2=NN(c3cc(C(C)(C)C)cc(C(C)(C)C)c3)[C]N21
926	CC(C)[C@@H]1CCC2=NN(c3cc(C(F)(F)F)cc(C(F)(F)F)c3)[C]N21
927	CC(C)[C@@H]1CCC2=NN(c3cc(Cl)cc(Cl)c3)[C]N21
928	CC(C)[C@@H]1CCC2=NN(c3cc(F)c(F)c(F)c3)[C]N21
929	CC(C)[C@@H]1CCC2=NN(c3cc(F)cc(F)c3)[C]N21
931	CC(C)[C@@H]1CCC2=NN(c3ccc(Br)cc3)[C]N21
932	CC(C)[C@@H]1CCC2=NN(c3ccc(C#N)cc3)[C]N21
933	CC(C)[C@@H]1CCC2=NN(c3ccc(C(C)(C)C)cc3)[C]N21
934	CC(C)[C@@H]1CCC2=NN(c3ccc(C(F)(F)F)cc3)[C]N21
935	CC(C)[C@@H]1CCC2=NN(c3ccc(Cl)cc3)[C]N21
936	CC(C)[C@@H]1CCC2=NN(c3ccc(F)cc3)[C]N21
937	CC(C)[C@@H]1CCC2=NN(c3ccc(O)cc3)[C]N21
938	CC(C)[C@@H]1CCC2=NN(c3ccc([N+](=O)[O-])cc3)[C]N21
939	CC(C)[C@@H]1CCC2=NN(c3ccccc3)[C]N21
940	CC(C)[C@@H]1CCN2[C]N(C(C)C)N=C12
941	CC(C)[C@@H]1CCN2[C]N(C)N=C12
942	CC(C)[C@@H]1CCN2[C]N(C3CCCCC3)N=C12
943	CC(C)[C@@H]1CCN2[C]N(Cc3ccccc3)N=C12
944	CC(C)[C@@H]1CCN2[C]N(Cc3ccccn3)N=C12
945	CC(C)[C@@H]1CCN2[C]N([C@H](C)C3CCCCC3)N=C12
946	CC(C)[C@@H]1CCN2[C]N([C@H](C)c3cccc4ccccc34)N=C12
947	CC(C)[C@@H]1CCN2[C]N([C@H](C)c3ccccc3)N=C12
948	CC(C)[C@@H]1CCN2[C]N(c3c(Cl)cc(Cl)cc3Cl)N=C12
949	CC(C)[C@@H]1CCN2[C]N(c3c(F)c(F)c(F)c(F)c3F)N=C12
950	CC(C)[C@@H]1CCN2[C]N(c3c(F)cccc3F)N=C12
951	CC(C)[C@@H]1CCN2[C]N(c3cc(C(C)(C)C)cc(C(C)(C)C)c3)N=C12
952	CC(C)[C@@H]1CCN2[C]N(c3cc(C(F)(F)F)cc(C(F)(F)F)c3)N=C12
953	CC(C)[C@@H]1CCN2[C]N(c3cc(Cl)cc(Cl)c3)N=C12
954	CC(C)[C@@H]1CCN2[C]N(c3cc(F)c(F)c(F)c3)N=C12
955	CC(C)[C@@H]1CCN2[C]N(c3cc(F)cc(F)c3)N=C12
956	CC(C)[C@@H]1CCN2[C]N(c3cc([N+](=O)[O-])cc([N+](=O)[O-])c3)N=C12
957	CC(C)[C@@H]1CCN2[C]N(c3ccc(Br)cc3)N=C12
958	CC(C)[C@@H]1CCN2[C]N(c3ccc(C#N)cc3)N=C12
959	CC(C)[C@@H]1CCN2[C]N(c3ccc(C(C)(C)C)cc3)N=C12
960	CC(C)[C@@H]1CCN2[C]N(c3ccc(C(F)(F)F)cc3)N=C12
961	CC(C)[C@@H]1CCN2[C]N(c3ccc(Cl)cc3)N=C12
962	CC(C)[C@@H]1CCN2[C]N(c3ccc(F)cc3)N=C12
963	CC(C)[C@@H]1CCN2[C]N(c3ccc(O)cc3)N=C12
964	CC(C)[C@@H]1CCN2[C]N(c3ccc([N+](=O)[O-])cc3)N=C12
965	CC(C)[C@@H]1CCN2[C]N(c3ccccc3)N=C12
966	CC(C)[C@@H]1C[C@@H](C#N)C2=NN(C(C)C)[C]N21
967	CC(C)[C@@H]1C[C@@H](C#N)C2=NN(C)[C]N21
968	CC(C)[C@@H]1C[C@@H](C#N)C2=NN(C3CCCCC3)[C]N21
969	CC(C)[C@@H]1C[C@@H](C#N)C2=NN(Cc3ccccc3)[C]N21
970	CC(C)[C@@H]1C[C@@H](C#N)C2=NN(Cc3ccccn3)[C]N21
971	CC(C)[C@@H]1C[C@@H](C#N)C2=NN([C@H](C)C3CCCCC3)[C]N21
972	CC(C)[C@@H]1C[C@@H](C#N)C2=NN([C@H](C)c3cccc4ccccc34)[C]N21
973	CC(C)[C@@H]1C[C@@H](C#N)C2=NN([C@H](C)c3ccccc3)[C]N21
974	CC(C)[C@@H]1C[C@@H](C#N)C2=NN(c3c(Cl)cc(Cl)cc3Cl)[C]N21
975	CC(C)[C@@H]1C[C@@H](C#N)C2=NN(c3c(F)c(F)c(F)c(F)c3F)[C]N21
976	CC(C)[C@@H]1C[C@@H](C#N)C2=NN(c3c(F)cccc3F)[C]N21
977	CC(C)[C@@H]1C[C@@H](C#N)C2=NN(c3cc(C(C)(C)C)cc(C(C)(C)C)c3)[C]N21
978	CC(C)[C@@H]1C[C@@H](C#N)C2=NN(c3cc(C(F)(F)F)cc(C(F)(F)F)c3)[C]N21
979	CC(C)[C@@H]1C[C@@H](C#N)C2=NN(c3cc(Cl)cc(Cl)c3)[C]N21
980	CC(C)[C@@H]1C[C@@H](C#N)C2=NN(c3cc(F)c(F)c(F)c3)[C]N21
981	CC(C)[C@@H]1C[C@@H](C#N)C2=NN(c3cc(F)cc(F)c3)[C]N21
982	CC(C)[C@@H]1C[C@@H](C#N)C2=NN(c3cc([N+](=O)[O-])cc([N+](=O)[O-])c3)[C]N21
983	CC(C)[C@@H]1C[C@@H](C#N)C2=NN(c3ccc(Br)cc3)[C]N21
984	CC(C)[C@@H]1C[C@@H](C#N)C2=NN(c3ccc(C#N)cc3)[C]N21
985	CC(C)[C@@H]1C[C@@H](C#N)C2=NN(c3ccc(C(C)(C)C)cc3)[C]N21
986	CC(C)[C@@H]1C[C@@H](C#N)C2=NN(c3ccc(C(F)(F)F)cc3)[C]N21
987	CC(C)[C@@H]1C[C@@H](C#N)C2=NN(c3ccc(Cl)cc3)[C]N21
988	CC(C)[C@@H]1C[C@@H](C#N)C2=NN(c3ccc(F)cc3)[C]N21
989	CC(C)[C@@H]1C[C@@H](C#N)C2=NN(c3ccc(O)cc3)[C]N21
990	CC(C)[C@@H]1C[C@@H](C#N)C2=NN(c3ccc([N+](=O)[O-])cc3)[C]N21
991	CC(C)[C@@H]1C[C@@H](C#N)C2=NN(c3ccccc3)[C]N21
992	CC(C)[C@@H]1C[C@@H](C(C)(C)C)N2[C]N(C(C)C)N=C12
993	CC(C)[C@@H]1C[C@@H](C(C)(C)C)N2[C]N(C)N=C12
994	CC(C)[C@@H]1C[C@@H](C(C)(C)C)N2[C]N(C3CCCCC3)N=C12
995	CC(C)[C@@H]1C[C@@H](C(C)(C)C)N2[C]N(Cc3ccccc3)N=C12
996	CC(C)[C@@H]1C[C@@H](C(C)(C)C)N2[C]N(Cc3ccccn3)N=C12
997	CC(C)[C@@H]1C[C@@H](C(C)(C)C)N2[C]N([C@H](C)C3CCCCC3)N=C12
998	CC(C)[C@@H]1C[C@@H](C(C)(C)C)N2[C]N([C@H](C)c3cccc4ccccc34)N=C12
999	CC(C)[C@@H]1C[C@@H](C(C)(C)C)N2[C]N([C@H](C)c3ccccc3)N=C12
1000	CC(C)[C@@H]1C[C@@H](C(C)(C)C)N2[C]N(c3c(Cl)cc(Cl)cc3Cl)N=C12
1001	CC(C)[C@@H]1C[C@@H](C(C)(C)C)N2[C]N(c3c(F)c(F)c(F)c(F)c3F)N=C12
1002	CC(C)[C@@H]1C[C@@H](C(C)(C)C)N2[C]N(c3c(F)cccc3F)N=C12
1003	CC(C)[C@@H]1C[C@@H](C(C)(C)C)N2[C]N(c3cc(C(C)(C)C)cc(C(C)(C)C)c3)N=C12
1004	CC(C)[C@@H]1C[C@@H](C(C)(C)C)N2[C]N(c3cc(C(F)(F)F)cc(C(F)(F)F)c3)N=C12
1005	CC(C)[C@@H]1C[C@@H](C(C)(C)C)N2[C]N(c3cc(Cl)cc(Cl)c3)N=C12
1006	CC(C)[C@@H]1C[C@@H](C(C)(C)C)N2[C]N(c3cc(F)c(F)c(F)c3)N=C12
1007	CC(C)[C@@H]1C[C@@H](C(C)(C)C)N2[C]N(c3cc(F)cc(F)c3)N=C12
1008	CC(C)[C@@H]1C[C@@H](C(C)(C)C)N2[C]N(c3cc([N+](=O)[O-])cc([N+](=O)[O-])c3)N=C12
1009	CC(C)[C@@H]1C[C@@H](C(C)(C)C)N2[C]N(c3ccc(Br)cc3)N=C12
1010	CC(C)[C@@H]1C[C@@H](C(C)(C)C)N2[C]N(c3ccc(C#N)cc3)N=C12
1011	CC(C)[C@@H]1C[C@@H](C(C)(C)C)N2[C]N(c3ccc(C(C)(C)C)cc3)N=C12
1012	CC(C)[C@@H]1C[C@@H](C(C)(C)C)N2[C]N(c3ccc(C(F)(F)F)cc3)N=C12
1013	CC(C)[C@@H]1C[C@@H](C(C)(C)C)N2[C]N(c3ccc(Cl)cc3)N=C12
1014	CC(C)[C@@H]1C[C@@H](C(C)(C)C)N2[C]N(c3ccc(F)cc3)N=C12
1015	CC(C)[C@@H]1C[C@@H](C(C)(C)C)N2[C]N(c3ccc(O)cc3)N=C12
1016	CC(C)[C@@H]1C[C@@H](C(C)(C)C)N2[C]N(c3ccc([N+](=O)[O-])cc3)N=C12
1017	CC(C)[C@@H]1C[C@@H](C(C)(C)C)N2[C]N(c3ccccc3)N=C12
1018	CC(C)[C@@H]1C[C@@H](C(C)C)N2[C]N(C(C)C)N=C12
1019	CC(C)[C@@H]1C[C@@H](C(C)C)N2[C]N(C)N=C12
1020	CC(C)[C@@H]1C[C@@H](C(C)C)N2[C]N(C3CCCCC3)N=C12
1021	CC(C)[C@@H]1C[C@@H](C(C)C)N2[C]N(Cc3ccccc3)N=C12
1022	CC(C)[C@@H]1C[C@@H](C(C)C)N2[C]N(Cc3ccccn3)N=C12
1023	CC(C)[C@@H]1C[C@@H](C(C)C)N2[C]N([C@H](C)C3CCCCC3)N=C12
1024	CC(C)[C@@H]1C[C@@H](C(C)C)N2[C]N([C@H](C)c3cccc4ccccc34)N=C12
1025	CC(C)[C@@H]1C[C@@H](C(C)C)N2[C]N([C@H](C)c3ccccc3)N=C12
1026	CC(C)[C@@H]1C[C@@H](C(C)C)N2[C]N(c3c(Cl)cc(Cl)cc3Cl)N=C12
1027	CC(C)[C@@H]1C[C@@H](C(C)C)N2[C]N(c3c(F)c(F)c(F)c(F)c3F)N=C12
1028	CC(C)[C@@H]1C[C@@H](C(C)C)N2[C]N(c3c(F)cccc3F)N=C12
1029	CC(C)[C@@H]1C[C@@H](C(C)C)N2[C]N(c3cc(C(C)(C)C)cc(C(C)(C)C)c3)N=C12
1030	CC(C)[C@@H]1C[C@@H](C(C)C)N2[C]N(c3cc(C(F)(F)F)cc(C(F)(F)F)c3)N=C12
1031	CC(C)[C@@H]1C[C@@H](C(C)C)N2[C]N(c3cc(Cl)cc(Cl)c3)N=C12
1032	CC(C)[C@@H]1C[C@@H](C(C)C)N2[C]N(c3cc(F)c(F)c(F)c3)N=C12
1033	CC(C)[C@@H]1C[C@@H](C(C)C)N2[C]N(c3cc(F)cc(F)c3)N=C12
1034	CC(C)[C@@H]1C[C@@H](C(C)C)N2[C]N(c3cc([N+](=O)[O-])cc([N+](=O)[O-])c3)N=C12
1035	CC(C)[C@@H]1C[C@@H](C(C)C)N2[C]N(c3ccc(Br)cc3)N=C12
1036	CC(C)[C@@H]1C[C@@H](C(C)C)N2[C]N(c3ccc(C#N)cc3)N=C12
1037	CC(C)[C@@H]1C[C@@H](C(C)C)N2[C]N(c3ccc(C(C)(C)C)cc3)N=C12
1038	CC(C)[C@@H]1C[C@@H](C(C)C)N2[C]N(c3ccc(C(F)(F)F)cc3)N=C12
1039	CC(C)[C@@H]1C[C@@H](C(C)C)N2[C]N(c3ccc(Cl)cc3)N=C12
1040	CC(C)[C@@H]1C[C@@H](C(C)C)N2[C]N(c3ccc(F)cc3)N=C12
1041	CC(C)[C@@H]1C[C@@H](C(C)C)N2[C]N(c3ccc(O)cc3)N=C12
1042	CC(C)[C@@H]1C[C@@H](C(C)C)N2[C]N(c3ccc([N+](=O)[O-])cc3)N=C12
1043	CC(C)[C@@H]1C[C@@H](C(C)C)N2[C]N(c3ccccc3)N=C12
1044	CC(C)[C@@H]1C[C@@H](C(F)(F)F)C2=NN(C(C)C)[C]N21
1045	CC(C)[C@@H]1C[C@@H](C(F)(F)F)C2=NN(C)[C]N21
1046	CC(C)[C@@H]1C[C@@H](C(F)(F)F)C2=NN(C3CCCCC3)[C]N21
1047	CC(C)[C@@H]1C[C@@H](C(F)(F)F)C2=NN(Cc3ccccc3)[C]N21
1048	CC(C)[C@@H]1C[C@@H](C(F)(F)F)C2=NN(Cc3ccccn3)[C]N21
1049	CC(C)[C@@H]1C[C@@H](C(F)(F)F)C2=NN([C@H](C)C3CCCCC3)[C]N21
1050	CC(C)[C@@H]1C[C@@H](C(F)(F)F)C2=NN([C@H](C)c3cccc4ccccc34)[C]N21
1051	CC(C)[C@@H]1C[C@@H](C(F)(F)F)C2=NN([C@H](C)c3ccccc3)[C]N21
1052	CC(C)[C@@H]1C[C@@H](C(F)(F)F)C2=NN(c3c(Cl)cc(Cl)cc3Cl)[C]N21
1053	CC(C)[C@@H]1C[C@@H](C(F)(F)F)C2=NN(c3c(F)c(F)c(F)c(F)c3F)[C]N21
1054	CC(C)[C@@H]1C[C@@H](C(F)(F)F)C2=NN(c3c(F)cccc3F)[C]N21
1055	CC(C)[C@@H]1C[C@@H](C(F)(F)F)C2=NN(c3cc(C(C)(C)C)cc(C(C)(C)C)c3)[C]N21
1056	CC(C)[C@@H]1C[C@@H](C(F)(F)F)C2=NN(c3cc(C(F)(F)F)cc(C(F)(F)F)c3)[C]N21
1057	CC(C)[C@@H]1C[C@@H](C(F)(F)F)C2=NN(c3cc(Cl)cc(Cl)c3)[C]N21
1058	CC(C)[C@@H]1C[C@@H](C(F)(F)F)C2=NN(c3cc(F)c(F)c(F)c3)[C]N21
1059	CC(C)[C@@H]1C[C@@H](C(F)(F)F)C2=NN(c3cc(F)cc(F)c3)[C]N21
1060	CC(C)[C@@H]1C[C@@H](C(F)(F)F)C2=NN(c3cc([N+](=O)[O-])cc([N+](=O)[O-])c3)[C]N21
1061	CC(C)[C@@H]1C[C@@H](C(F)(F)F)C2=NN(c3ccc(Br)cc3)[C]N21
1062	CC(C)[C@@H]1C[C@@H](C(F)(F)F)C2=NN(c3ccc(C#N)cc3)[C]N21
1063	CC(C)[C@@H]1C[C@@H](C(F)(F)F)C2=NN(c3ccc(C(C)(C)C)cc3)[C]N21
1064	CC(C)[C@@H]1C[C@@H](C(F)(F)F)C2=NN(c3ccc(C(F)(F)F)cc3)[C]N21
1065	CC(C)[C@@H]1C[C@@H](C(F)(F)F)C2=NN(c3ccc(Cl)cc3)[C]N21
1066	CC(C)[C@@H]1C[C@@H](C(F)(F)F)C2=NN(c3ccc(F)cc3)[C]N21
1067	CC(C)[C@@H]1C[C@@H](C(F)(F)F)C2=NN(c3ccc(O)cc3)[C]N21
1068	CC(C)[C@@H]1C[C@@H](C(F)(F)F)C2=NN(c3ccc([N+](=O)[O-])cc3)[C]N21
1069	CC(C)[C@@H]1C[C@@H](C(F)(F)F)C2=NN(c3ccccc3)[C]N21
1070	CC(C)[C@@H]1C[C@@H](C(F)(c2ccccc2)c2ccccc2)N2[C]N(C(C)C)N=C12
1071	CC(C)[C@@H]1C[C@@H](C(F)(c2ccccc2)c2ccccc2)N2[C]N(C)N=C12
1072	CC(C)[C@@H]1C[C@@H](C(F)(c2ccccc2)c2ccccc2)N2[C]N(C3CCCCC3)N=C12
1073	CC(C)[C@@H]1C[C@@H](C(F)(c2ccccc2)c2ccccc2)N2[C]N(Cc3ccccc3)N=C12
1074	CC(C)[C@@H]1C[C@@H](C(F)(c2ccccc2)c2ccccc2)N2[C]N(Cc3ccccn3)N=C12
1075	CC(C)[C@@H]1C[C@@H](C(F)(c2ccccc2)c2ccccc2)N2[C]N([C@H](C)C3CCCCC3)N=C12
1076	CC(C)[C@@H]1C[C@@H](C(F)(c2ccccc2)c2ccccc2)N2[C]N([C@H](C)c3cccc4ccccc34)N=C12
1077	CC(C)[C@@H]1C[C@@H](C(F)(c2ccccc2)c2ccccc2)N2[C]N([C@H](C)c3ccccc3)N=C12
1078	CC(C)[C@@H]1C[C@@H](C(F)(c2ccccc2)c2ccccc2)N2[C]N(c3c(Cl)cc(Cl)cc3Cl)N=C12
1079	CC(C)[C@@H]1C[C@@H](C(F)(c2ccccc2)c2ccccc2)N2[C]N(c3c(F)c(F)c(F)c(F)c3F)N=C12
1080	CC(C)[C@@H]1C[C@@H](C(F)(c2ccccc2)c2ccccc2)N2[C]N(c3c(F)cccc3F)N=C12
1081	CC(C)[C@@H]1C[C@@H](C(F)(c2ccccc2)c2ccccc2)N2[C]N(c3cc(C(C)(C)C)cc(C(C)(C)C)c3)N=C12
1082	CC(C)[C@@H]1C[C@@H](C(F)(c2ccccc2)c2ccccc2)N2[C]N(c3cc(C(F)(F)F)cc(C(F)(F)F)c3)N=C12
1083	CC(C)[C@@H]1C[C@@H](C(F)(c2ccccc2)c2ccccc2)N2[C]N(c3cc(Cl)cc(Cl)c3)N=C12
1084	CC(C)[C@@H]1C[C@@H](C(F)(c2ccccc2)c2ccccc2)N2[C]N(c3cc(F)c(F)c(F)c3)N=C12
1085	CC(C)[C@@H]1C[C@@H](C(F)(c2ccccc2)c2ccccc2)N2[C]N(c3cc(F)cc(F)c3)N=C12
1086	CC(C)[C@@H]1C[C@@H](C(F)(c2ccccc2)c2ccccc2)N2[C]N(c3cc([N+](=O)[O-])cc([N+](=O)[O-])c3)N=C12
1087	CC(C)[C@@H]1C[C@@H](C(F)(c2ccccc2)c2ccccc2)N2[C]N(c3ccc(Br)cc3)N=C12
1088	CC(C)[C@@H]1C[C@@H](C(F)(c2ccccc2)c2ccccc2)N2[C]N(c3ccc(C#N)cc3)N=C12
1089	CC(C)[C@@H]1C[C@@H](C(F)(c2ccccc2)c2ccccc2)N2[C]N(c3ccc(C(C)(C)C)cc3)N=C12
1090	CC(C)[C@@H]1C[C@@H](C(F)(c2ccccc2)c2ccccc2)N2[C]N(c3ccc(C(F)(F)F)cc3)N=C12
1092	CC(C)[C@@H]1C[C@@H](C(F)(c2ccccc2)c2ccccc2)N2[C]N(c3ccc(F)cc3)N=C12
1093	CC(C)[C@@H]1C[C@@H](C(F)(c2ccccc2)c2ccccc2)N2[C]N(c3ccc(O)cc3)N=C12
1094	CC(C)[C@@H]1C[C@@H](C(F)(c2ccccc2)c2ccccc2)N2[C]N(c3ccc([N+](=O)[O-])cc3)N=C12
1095	CC(C)[C@@H]1C[C@@H](C(F)(c2ccccc2)c2ccccc2)N2[C]N(c3ccccc3)N=C12
1096	CC(C)[C@@H]1C[C@@H](C(O)(c2cc(C(F)(F)F)cc(C(F)(F)F)c2)c2cc(C(F)(F)F)cc(C(F)(F)F)c2)N2[C]N(C(C)C)N=C12
1098	CC(C)[C@@H]1C[C@@H](C(O)(c2cc(C(F)(F)F)cc(C(F)(F)F)c2)c2cc(C(F)(F)F)cc(C(F)(F)F)c2)N2[C]N(C3CCCCC3)N=C12
1099	CC(C)[C@@H]1C[C@@H](C(O)(c2cc(C(F)(F)F)cc(C(F)(F)F)c2)c2cc(C(F)(F)F)cc(C(F)(F)F)c2)N2[C]N(Cc3ccccc3)N=C12
1101	CC(C)[C@@H]1C[C@@H](C(O)(c2cc(C(F)(F)F)cc(C(F)(F)F)c2)c2cc(C(F)(F)F)cc(C(F)(F)F)c2)N2[C]N([C@H](C)C3CCCCC3)N=C12
1102	CC(C)[C@@H]1C[C@@H](C(O)(c2cc(C(F)(F)F)cc(C(F)(F)F)c2)c2cc(C(F)(F)F)cc(C(F)(F)F)c2)N2[C]N([C@H](C)c3cccc4ccccc34)N=C12
1103	CC(C)[C@@H]1C[C@@H](C(O)(c2cc(C(F)(F)F)cc(C(F)(F)F)c2)c2cc(C(F)(F)F)cc(C(F)(F)F)c2)N2[C]N([C@H](C)c3ccccc3)N=C12
1104	CC(C)[C@@H]1C[C@@H](C(O)(c2cc(C(F)(F)F)cc(C(F)(F)F)c2)c2cc(C(F)(F)F)cc(C(F)(F)F)c2)N2[C]N(c3c(Cl)cc(Cl)cc3Cl)N=C12
1105	CC(C)[C@@H]1C[C@@H](C(O)(c2cc(C(F)(F)F)cc(C(F)(F)F)c2)c2cc(C(F)(F)F)cc(C(F)(F)F)c2)N2[C]N(c3c(F)c(F)c(F)c(F)c3F)N=C12
1106	CC(C)[C@@H]1C[C@@H](C(O)(c2cc(C(F)(F)F)cc(C(F)(F)F)c2)c2cc(C(F)(F)F)cc(C(F)(F)F)c2)N2[C]N(c3c(F)cccc3F)N=C12
1107	CC(C)[C@@H]1C[C@@H](C(O)(c2cc(C(F)(F)F)cc(C(F)(F)F)c2)c2cc(C(F)(F)F)cc(C(F)(F)F)c2)N2[C]N(c3cc(C(C)(C)C)cc(C(C)(C)C)c3)N=C12
1108	CC(C)[C@@H]1C[C@@H](C(O)(c2cc(C(F)(F)F)cc(C(F)(F)F)c2)c2cc(C(F)(F)F)cc(C(F)(F)F)c2)N2[C]N(c3cc(C(F)(F)F)cc(C(F)(F)F)c3)N=C12
1109	CC(C)[C@@H]1C[C@@H](C(O)(c2cc(C(F)(F)F)cc(C(F)(F)F)c2)c2cc(C(F)(F)F)cc(C(F)(F)F)c2)N2[C]N(c3cc(Cl)cc(Cl)c3)N=C12
1110	CC(C)[C@@H]1C[C@@H](C(O)(c2cc(C(F)(F)F)cc(C(F)(F)F)c2)c2cc(C(F)(F)F)cc(C(F)(F)F)c2)N2[C]N(c3cc(F)c(F)c(F)c3)N=C12
1111	CC(C)[C@@H]1C[C@@H](C(O)(c2cc(C(F)(F)F)cc(C(F)(F)F)c2)c2cc(C(F)(F)F)cc(C(F)(F)F)c2)N2[C]N(c3cc(F)cc(F)c3)N=C12
1112	CC(C)[C@@H]1C[C@@H](C(O)(c2cc(C(F)(F)F)cc(C(F)(F)F)c2)c2cc(C(F)(F)F)cc(C(F)(F)F)c2)N2[C]N(c3cc([N+](=O)[O-])cc([N+](=O)[O-])c3)N=C12
1113	CC(C)[C@@H]1C[C@@H](C(O)(c2cc(C(F)(F)F)cc(C(F)(F)F)c2)c2cc(C(F)(F)F)cc(C(F)(F)F)c2)N2[C]N(c3ccc(Br)cc3)N=C12
1114	CC(C)[C@@H]1C[C@@H](C(O)(c2cc(C(F)(F)F)cc(C(F)(F)F)c2)c2cc(C(F)(F)F)cc(C(F)(F)F)c2)N2[C]N(c3ccc(C#N)cc3)N=C12
1115	CC(C)[C@@H]1C[C@@H](C(O)(c2cc(C(F)(F)F)cc(C(F)(F)F)c2)c2cc(C(F)(F)F)cc(C(F)(F)F)c2)N2[C]N(c3ccc(C(C)(C)C)cc3)N=C12
1116	CC(C)[C@@H]1C[C@@H](C(O)(c2cc(C(F)(F)F)cc(C(F)(F)F)c2)c2cc(C(F)(F)F)cc(C(F)(F)F)c2)N2[C]N(c3ccc(C(F)(F)F)cc3)N=C12
1117	CC(C)[C@@H]1C[C@@H](C(O)(c2cc(C(F)(F)F)cc(C(F)(F)F)c2)c2cc(C(F)(F)F)cc(C(F)(F)F)c2)N2[C]N(c3ccc(Cl)cc3)N=C12
1118	CC(C)[C@@H]1C[C@@H](C(O)(c2cc(C(F)(F)F)cc(C(F)(F)F)c2)c2cc(C(F)(F)F)cc(C(F)(F)F)c2)N2[C]N(c3ccc(F)cc3)N=C12
1119	CC(C)[C@@H]1C[C@@H](C(O)(c2cc(C(F)(F)F)cc(C(F)(F)F)c2)c2cc(C(F)(F)F)cc(C(F)(F)F)c2)N2[C]N(c3ccc(O)cc3)N=C12
1120	CC(C)[C@@H]1C[C@@H](C(O)(c2cc(C(F)(F)F)cc(C(F)(F)F)c2)c2cc(C(F)(F)F)cc(C(F)(F)F)c2)N2[C]N(c3ccc([N+](=O)[O-])cc3)N=C12
1121	CC(C)[C@@H]1C[C@@H](C(O)(c2cc(C(F)(F)F)cc(C(F)(F)F)c2)c2cc(C(F)(F)F)cc(C(F)(F)F)c2)N2[C]N(c3ccccc3)N=C12
1122	CC(C)[C@@H]1C[C@@H](C(O)(c2ccccc2)c2ccccc2)N2[C]N(C(C)C)N=C12
1123	CC(C)[C@@H]1C[C@@H](C(O)(c2ccccc2)c2ccccc2)N2[C]N(C)N=C12
1124	CC(C)[C@@H]1C[C@@H](C(O)(c2ccccc2)c2ccccc2)N2[C]N(C3CCCCC3)N=C12
1125	CC(C)[C@@H]1C[C@@H](C(O)(c2ccccc2)c2ccccc2)N2[C]N(Cc3ccccc3)N=C12
1126	CC(C)[C@@H]1C[C@@H](C(O)(c2ccccc2)c2ccccc2)N2[C]N(Cc3ccccn3)N=C12
1127	CC(C)[C@@H]1C[C@@H](C(O)(c2ccccc2)c2ccccc2)N2[C]N([C@H](C)C3CCCCC3)N=C12
1128	CC(C)[C@@H]1C[C@@H](C(O)(c2ccccc2)c2ccccc2)N2[C]N([C@H](C)c3cccc4ccccc34)N=C12
1129	CC(C)[C@@H]1C[C@@H](C(O)(c2ccccc2)c2ccccc2)N2[C]N([C@H](C)c3ccccc3)N=C12
1130	CC(C)[C@@H]1C[C@@H](C(O)(c2ccccc2)c2ccccc2)N2[C]N(c3c(Cl)cc(Cl)cc3Cl)N=C12
1131	CC(C)[C@@H]1C[C@@H](C(O)(c2ccccc2)c2ccccc2)N2[C]N(c3c(F)c(F)c(F)c(F)c3F)N=C12
1132	CC(C)[C@@H]1C[C@@H](C(O)(c2ccccc2)c2ccccc2)N2[C]N(c3c(F)cccc3F)N=C12
1133	CC(C)[C@@H]1C[C@@H](C(O)(c2ccccc2)c2ccccc2)N2[C]N(c3cc(C(C)(C)C)cc(C(C)(C)C)c3)N=C12
1134	CC(C)[C@@H]1C[C@@H](C(O)(c2ccccc2)c2ccccc2)N2[C]N(c3cc(C(F)(F)F)cc(C(F)(F)F)c3)N=C12
1135	CC(C)[C@@H]1C[C@@H](C(O)(c2ccccc2)c2ccccc2)N2[C]N(c3cc(Cl)cc(Cl)c3)N=C12
1136	CC(C)[C@@H]1C[C@@H](C(O)(c2ccccc2)c2ccccc2)N2[C]N(c3cc(F)c(F)c(F)c3)N=C12
1137	CC(C)[C@@H]1C[C@@H](C(O)(c2ccccc2)c2ccccc2)N2[C]N(c3cc(F)cc(F)c3)N=C12
1138	CC(C)[C@@H]1C[C@@H](C(O)(c2ccccc2)c2ccccc2)N2[C]N(c3cc([N+](=O)[O-])cc([N+](=O)[O-])c3)N=C12
1139	CC(C)[C@@H]1C[C@@H](C(O)(c2ccccc2)c2ccccc2)N2[C]N(c3ccc(Br)cc3)N=C12
1140	CC(C)[C@@H]1C[C@@H](C(O)(c2ccccc2)c2ccccc2)N2[C]N(c3ccc(C#N)cc3)N=C12
1141	CC(C)[C@@H]1C[C@@H](C(O)(c2ccccc2)c2ccccc2)N2[C]N(c3ccc(C(C)(C)C)cc3)N=C12
1142	CC(C)[C@@H]1C[C@@H](C(O)(c2ccccc2)c2ccccc2)N2[C]N(c3ccc(C(F)(F)F)cc3)N=C12
1143	CC(C)[C@@H]1C[C@@H](C(O)(c2ccccc2)c2ccccc2)N2[C]N(c3ccc(Cl)cc3)N=C12
1144	CC(C)[C@@H]1C[C@@H](C(O)(c2ccccc2)c2ccccc2)N2[C]N(c3ccc(F)cc3)N=C12
1145	CC(C)[C@@H]1C[C@@H](C(O)(c2ccccc2)c2ccccc2)N2[C]N(c3ccc(O)cc3)N=C12
1146	CC(C)[C@@H]1C[C@@H](C(O)(c2ccccc2)c2ccccc2)N2[C]N(c3ccc([N+](=O)[O-])cc3)N=C12
1147	CC(C)[C@@H]1C[C@@H](C(O)(c2ccccc2)c2ccccc2)N2[C]N(c3ccccc3)N=C12
1148	CC(C)[C@@H]1C[C@@H](C(O[Si](C)(C)C)(c2ccccc2)c2ccccc2)N2[C]N(C(C)C)N=C12
1149	CC(C)[C@@H]1C[C@@H](C(O[Si](C)(C)C)(c2ccccc2)c2ccccc2)N2[C]N(C)N=C12
1150	CC(C)[C@@H]1C[C@@H](C(O[Si](C)(C)C)(c2ccccc2)c2ccccc2)N2[C]N(C3CCCCC3)N=C12
1152	CC(C)[C@@H]1C[C@@H](C(O[Si](C)(C)C)(c2ccccc2)c2ccccc2)N2[C]N(Cc3ccccn3)N=C12
1153	CC(C)[C@@H]1C[C@@H](C(O[Si](C)(C)C)(c2ccccc2)c2ccccc2)N2[C]N([C@H](C)C3CCCCC3)N=C12
1154	CC(C)[C@@H]1C[C@@H](C(O[Si](C)(C)C)(c2ccccc2)c2ccccc2)N2[C]N([C@H](C)c3cccc4ccccc34)N=C12
1155	CC(C)[C@@H]1C[C@@H](C(O[Si](C)(C)C)(c2ccccc2)c2ccccc2)N2[C]N([C@H](C)c3ccccc3)N=C12
1156	CC(C)[C@@H]1C[C@@H](C(O[Si](C)(C)C)(c2ccccc2)c2ccccc2)N2[C]N(c3c(Cl)cc(Cl)cc3Cl)N=C12
1157	CC(C)[C@@H]1C[C@@H](C(O[Si](C)(C)C)(c2ccccc2)c2ccccc2)N2[C]N(c3c(F)c(F)c(F)c(F)c3F)N=C12
1158	CC(C)[C@@H]1C[C@@H](C(O[Si](C)(C)C)(c2ccccc2)c2ccccc2)N2[C]N(c3c(F)cccc3F)N=C12
1159	CC(C)[C@@H]1C[C@@H](C(O[Si](C)(C)C)(c2ccccc2)c2ccccc2)N2[C]N(c3cc(C(C)(C)C)cc(C(C)(C)C)c3)N=C12
1160	CC(C)[C@@H]1C[C@@H](C(O[Si](C)(C)C)(c2ccccc2)c2ccccc2)N2[C]N(c3cc(C(F)(F)F)cc(C(F)(F)F)c3)N=C12
1161	CC(C)[C@@H]1C[C@@H](C(O[Si](C)(C)C)(c2ccccc2)c2ccccc2)N2[C]N(c3cc(Cl)cc(Cl)c3)N=C12
1162	CC(C)[C@@H]1C[C@@H](C(O[Si](C)(C)C)(c2ccccc2)c2ccccc2)N2[C]N(c3cc(F)c(F)c(F)c3)N=C12
1163	CC(C)[C@@H]1C[C@@H](C(O[Si](C)(C)C)(c2ccccc2)c2ccccc2)N2[C]N(c3cc(F)cc(F)c3)N=C12
1164	CC(C)[C@@H]1C[C@@H](C(O[Si](C)(C)C)(c2ccccc2)c2ccccc2)N2[C]N(c3cc([N+](=O)[O-])cc([N+](=O)[O-])c3)N=C12
1165	CC(C)[C@@H]1C[C@@H](C(O[Si](C)(C)C)(c2ccccc2)c2ccccc2)N2[C]N(c3ccc(Br)cc3)N=C12
1166	CC(C)[C@@H]1C[C@@H](C(O[Si](C)(C)C)(c2ccccc2)c2ccccc2)N2[C]N(c3ccc(C#N)cc3)N=C12
1167	CC(C)[C@@H]1C[C@@H](C(O[Si](C)(C)C)(c2ccccc2)c2ccccc2)N2[C]N(c3ccc(C(C)(C)C)cc3)N=C12
1168	CC(C)[C@@H]1C[C@@H](C(O[Si](C)(C)C)(c2ccccc2)c2ccccc2)N2[C]N(c3ccc(C(F)(F)F)cc3)N=C12
1169	CC(C)[C@@H]1C[C@@H](C(O[Si](C)(C)C)(c2ccccc2)c2ccccc2)N2[C]N(c3ccc(Cl)cc3)N=C12
1170	CC(C)[C@@H]1C[C@@H](C(O[Si](C)(C)C)(c2ccccc2)c2ccccc2)N2[C]N(c3ccc(F)cc3)N=C12
1171	CC(C)[C@@H]1C[C@@H](C(O[Si](C)(C)C)(c2ccccc2)c2ccccc2)N2[C]N(c3ccc(O)cc3)N=C12
1172	CC(C)[C@@H]1C[C@@H](C(O[Si](C)(C)C)(c2ccccc2)c2ccccc2)N2[C]N(c3ccc([N+](=O)[O-])cc3)N=C12
1173	CC(C)[C@@H]1C[C@@H](C(O[Si](C)(C)C)(c2ccccc2)c2ccccc2)N2[C]N(c3ccccc3)N=C12
1174	CC(C)[C@@H]1C[C@@H](C(c2ccccc2)c2ccccc2)N2[C]N(C(C)C)N=C12
1175	CC(C)[C@@H]1C[C@@H](C(c2ccccc2)c2ccccc2)N2[C]N(C)N=C12
1176	CC(C)[C@@H]1C[C@@H](C(c2ccccc2)c2ccccc2)N2[C]N(C3CCCCC3)N=C12
1177	CC(C)[C@@H]1C[C@@H](C(c2ccccc2)c2ccccc2)N2[C]N(Cc3ccccc3)N=C12
1178	CC(C)[C@@H]1C[C@@H](C(c2ccccc2)c2ccccc2)N2[C]N(Cc3ccccn3)N=C12
1179	CC(C)[C@@H]1C[C@@H](C(c2ccccc2)c2ccccc2)N2[C]N([C@H](C)C3CCCCC3)N=C12
1180	CC(C)[C@@H]1C[C@@H](C(c2ccccc2)c2ccccc2)N2[C]N([C@H](C)c3cccc4ccccc34)N=C12
1181	CC(C)[C@@H]1C[C@@H](C(c2ccccc2)c2ccccc2)N2[C]N([C@H](C)c3ccccc3)N=C12
1182	CC(C)[C@@H]1C[C@@H](C(c2ccccc2)c2ccccc2)N2[C]N(c3c(Cl)cc(Cl)cc3Cl)N=C12
1183	CC(C)[C@@H]1C[C@@H](C(c2ccccc2)c2ccccc2)N2[C]N(c3c(F)c(F)c(F)c(F)c3F)N=C12
1184	CC(C)[C@@H]1C[C@@H](C(c2ccccc2)c2ccccc2)N2[C]N(c3c(F)cccc3F)N=C12
1185	CC(C)[C@@H]1C[C@@H](C(c2ccccc2)c2ccccc2)N2[C]N(c3cc(C(C)(C)C)cc(C(C)(C)C)c3)N=C12
1186	CC(C)[C@@H]1C[C@@H](C(c2ccccc2)c2ccccc2)N2[C]N(c3cc(C(F)(F)F)cc(C(F)(F)F)c3)N=C12
1187	CC(C)[C@@H]1C[C@@H](C(c2ccccc2)c2ccccc2)N2[C]N(c3cc(Cl)cc(Cl)c3)N=C12
1188	CC(C)[C@@H]1C[C@@H](C(c2ccccc2)c2ccccc2)N2[C]N(c3cc(F)c(F)c(F)c3)N=C12
1189	CC(C)[C@@H]1C[C@@H](C(c2ccccc2)c2ccccc2)N2[C]N(c3cc(F)cc(F)c3)N=C12
1190	CC(C)[C@@H]1C[C@@H](C(c2ccccc2)c2ccccc2)N2[C]N(c3cc([N+](=O)[O-])cc([N+](=O)[O-])c3)N=C12
1191	CC(C)[C@@H]1C[C@@H](C(c2ccccc2)c2ccccc2)N2[C]N(c3ccc(Br)cc3)N=C12
1192	CC(C)[C@@H]1C[C@@H](C(c2ccccc2)c2ccccc2)N2[C]N(c3ccc(C#N)cc3)N=C12
1193	CC(C)[C@@H]1C[C@@H](C(c2ccccc2)c2ccccc2)N2[C]N(c3ccc(C(C)(C)C)cc3)N=C12
1194	CC(C)[C@@H]1C[C@@H](C(c2ccccc2)c2ccccc2)N2[C]N(c3ccc(C(F)(F)F)cc3)N=C12
1195	CC(C)[C@@H]1C[C@@H](C(c2ccccc2)c2ccccc2)N2[C]N(c3ccc(Cl)cc3)N=C12
1196	CC(C)[C@@H]1C[C@@H](C(c2ccccc2)c2ccccc2)N2[C]N(c3ccc(F)cc3)N=C12
1197	CC(C)[C@@H]1C[C@@H](C(c2ccccc2)c2ccccc2)N2[C]N(c3ccc(O)cc3)N=C12
1198	CC(C)[C@@H]1C[C@@H](C(c2ccccc2)c2ccccc2)N2[C]N(c3ccc([N+](=O)[O-])cc3)N=C12
1199	CC(C)[C@@H]1C[C@@H](C(c2ccccc2)c2ccccc2)N2[C]N(c3ccccc3)N=C12
1200	CC(C)[C@@H]1C[C@@H](C)C2=NN(C(C)C)[C]N21
1201	CC(C)[C@@H]1C[C@@H](C)C2=NN(C)[C]N21
1202	CC(C)[C@@H]1C[C@@H](C)C2=NN(C3CCCCC3)[C]N21
1203	CC(C)[C@@H]1C[C@@H](C)C2=NN(Cc3ccccc3)[C]N21
1204	CC(C)[C@@H]1C[C@@H](C)C2=NN(Cc3ccccn3)[C]N21
1205	CC(C)[C@@H]1C[C@@H](C)C2=NN([C@H](C)C3CCCCC3)[C]N21
1206	CC(C)[C@@H]1C[C@@H](C)C2=NN([C@H](C)c3cccc4ccccc34)[C]N21
1207	CC(C)[C@@H]1C[C@@H](C)C2=NN([C@H](C)c3ccccc3)[C]N21
1208	CC(C)[C@@H]1C[C@@H](C)C2=NN(c3c(Cl)cc(Cl)cc3Cl)[C]N21
1209	CC(C)[C@@H]1C[C@@H](C)C2=NN(c3c(F)c(F)c(F)c(F)c3F)[C]N21
1210	CC(C)[C@@H]1C[C@@H](C)C2=NN(c3c(F)cccc3F)[C]N21
1211	CC(C)[C@@H]1C[C@@H](C)C2=NN(c3cc(C(C)(C)C)cc(C(C)(C)C)c3)[C]N21
1212	CC(C)[C@@H]1C[C@@H](C)C2=NN(c3cc(C(F)(F)F)cc(C(F)(F)F)c3)[C]N21
1213	CC(C)[C@@H]1C[C@@H](C)C2=NN(c3cc(Cl)cc(Cl)c3)[C]N21
1214	CC(C)[C@@H]1C[C@@H](C)C2=NN(c3cc(F)c(F)c(F)c3)[C]N21
1215	CC(C)[C@@H]1C[C@@H](C)C2=NN(c3cc(F)cc(F)c3)[C]N21
1216	CC(C)[C@@H]1C[C@@H](C)C2=NN(c3cc([N+](=O)[O-])cc([N+](=O)[O-])c3)[C]N21
1217	CC(C)[C@@H]1C[C@@H](C)C2=NN(c3ccc(Br)cc3)[C]N21
1218	CC(C)[C@@H]1C[C@@H](C)C2=NN(c3ccc(C#N)cc3)[C]N21
1219	CC(C)[C@@H]1C[C@@H](C)C2=NN(c3ccc(C(C)(C)C)cc3)[C]N21
1220	CC(C)[C@@H]1C[C@@H](C)C2=NN(c3ccc(C(F)(F)F)cc3)[C]N21
1222	CC(C)[C@@H]1C[C@@H](C)C2=NN(c3ccc(F)cc3)[C]N21
1223	CC(C)[C@@H]1C[C@@H](C)C2=NN(c3ccc(O)cc3)[C]N21
1224	CC(C)[C@@H]1C[C@@H](C)C2=NN(c3ccc([N+](=O)[O-])cc3)[C]N21
1225	CC(C)[C@@H]1C[C@@H](C)C2=NN(c3ccccc3)[C]N21
1226	CC(C)[C@@H]1C[C@@H](C)N2[C]N(C(C)C)N=C12
1227	CC(C)[C@@H]1C[C@@H](C)N2[C]N(C)N=C12
1228	CC(C)[C@@H]1C[C@@H](C)N2[C]N(C3CCCCC3)N=C12
1229	CC(C)[C@@H]1C[C@@H](C)N2[C]N(Cc3ccccc3)N=C12
1230	CC(C)[C@@H]1C[C@@H](C)N2[C]N(Cc3ccccn3)N=C12
1231	CC(C)[C@@H]1C[C@@H](C)N2[C]N([C@H](C)C3CCCCC3)N=C12
1232	CC(C)[C@@H]1C[C@@H](C)N2[C]N([C@H](C)c3cccc4ccccc34)N=C12
1233	CC(C)[C@@H]1C[C@@H](C)N2[C]N([C@H](C)c3ccccc3)N=C12
1234	CC(C)[C@@H]1C[C@@H](C)N2[C]N(c3c(Cl)cc(Cl)cc3Cl)N=C12
1235	CC(C)[C@@H]1C[C@@H](C)N2[C]N(c3c(F)c(F)c(F)c(F)c3F)N=C12
1236	CC(C)[C@@H]1C[C@@H](C)N2[C]N(c3c(F)cccc3F)N=C12
1237	CC(C)[C@@H]1C[C@@H](C)N2[C]N(c3cc(C(C)(C)C)cc(C(C)(C)C)c3)N=C12
1238	CC(C)[C@@H]1C[C@@H](C)N2[C]N(c3cc(C(F)(F)F)cc(C(F)(F)F)c3)N=C12
1239	CC(C)[C@@H]1C[C@@H](C)N2[C]N(c3cc(Cl)cc(Cl)c3)N=C12
1240	CC(C)[C@@H]1C[C@@H](C)N2[C]N(c3cc(F)c(F)c(F)c3)N=C12
1241	CC(C)[C@@H]1C[C@@H](C)N2[C]N(c3cc(F)cc(F)c3)N=C12
1242	CC(C)[C@@H]1C[C@@H](C)N2[C]N(c3cc([N+](=O)[O-])cc([N+](=O)[O-])c3)N=C12
1243	CC(C)[C@@H]1C[C@@H](C)N2[C]N(c3ccc(Br)cc3)N=C12
1244	CC(C)[C@@H]1C[C@@H](C)N2[C]N(c3ccc(C#N)cc3)N=C12
1245	CC(C)[C@@H]1C[C@@H](C)N2[C]N(c3ccc(C(C)(C)C)cc3)N=C12
1246	CC(C)[C@@H]1C[C@@H](C)N2[C]N(c3ccc(C(F)(F)F)cc3)N=C12
1247	CC(C)[C@@H]1C[C@@H](C)N2[C]N(c3ccc(Cl)cc3)N=C12
1248	CC(C)[C@@H]1C[C@@H](C)N2[C]N(c3ccc(F)cc3)N=C12
1249	CC(C)[C@@H]1C[C@@H](C)N2[C]N(c3ccc(O)cc3)N=C12
1251	CC(C)[C@@H]1C[C@@H](C)N2[C]N(c3ccccc3)N=C12
1252	CC(C)[C@@H]1C[C@@H](C2CCCCC2)N2[C]N(C(C)C)N=C12
1253	CC(C)[C@@H]1C[C@@H](C2CCCCC2)N2[C]N(C)N=C12
1254	CC(C)[C@@H]1C[C@@H](C2CCCCC2)N2[C]N(C3CCCCC3)N=C12
1255	CC(C)[C@@H]1C[C@@H](C2CCCCC2)N2[C]N(Cc3ccccc3)N=C12
1256	CC(C)[C@@H]1C[C@@H](C2CCCCC2)N2[C]N(Cc3ccccn3)N=C12
1257	CC(C)[C@@H]1C[C@@H](C2CCCCC2)N2[C]N([C@H](C)C3CCCCC3)N=C12
1258	CC(C)[C@@H]1C[C@@H](C2CCCCC2)N2[C]N([C@H](C)c3cccc4ccccc34)N=C12
1259	CC(C)[C@@H]1C[C@@H](C2CCCCC2)N2[C]N([C@H](C)c3ccccc3)N=C12
1260	CC(C)[C@@H]1C[C@@H](C2CCCCC2)N2[C]N(c3c(Cl)cc(Cl)cc3Cl)N=C12
1261	CC(C)[C@@H]1C[C@@H](C2CCCCC2)N2[C]N(c3c(F)c(F)c(F)c(F)c3F)N=C12
1262	CC(C)[C@@H]1C[C@@H](C2CCCCC2)N2[C]N(c3c(F)cccc3F)N=C12
1263	CC(C)[C@@H]1C[C@@H](C2CCCCC2)N2[C]N(c3cc(C(C)(C)C)cc(C(C)(C)C)c3)N=C12
1264	CC(C)[C@@H]1C[C@@H](C2CCCCC2)N2[C]N(c3cc(C(F)(F)F)cc(C(F)(F)F)c3)N=C12
1265	CC(C)[C@@H]1C[C@@H](C2CCCCC2)N2[C]N(c3cc(Cl)cc(Cl)c3)N=C12
1266	CC(C)[C@@H]1C[C@@H](C2CCCCC2)N2[C]N(c3cc(F)c(F)c(F)c3)N=C12
1267	CC(C)[C@@H]1C[C@@H](C2CCCCC2)N2[C]N(c3cc(F)cc(F)c3)N=C12
1268	CC(C)[C@@H]1C[C@@H](C2CCCCC2)N2[C]N(c3cc([N+](=O)[O-])cc([N+](=O)[O-])c3)N=C12
1269	CC(C)[C@@H]1C[C@@H](C2CCCCC2)N2[C]N(c3ccc(Br)cc3)N=C12
1270	CC(C)[C@@H]1C[C@@H](C2CCCCC2)N2[C]N(c3ccc(C#N)cc3)N=C12
1271	CC(C)[C@@H]1C[C@@H](C2CCCCC2)N2[C]N(c3ccc(C(C)(C)C)cc3)N=C12
1272	CC(C)[C@@H]1C[C@@H](C2CCCCC2)N2[C]N(c3ccc(C(F)(F)F)cc3)N=C12
1274	CC(C)[C@@H]1C[C@@H](C2CCCCC2)N2[C]N(c3ccc(F)cc3)N=C12
1275	CC(C)[C@@H]1C[C@@H](C2CCCCC2)N2[C]N(c3ccc(O)cc3)N=C12
1276	CC(C)[C@@H]1C[C@@H](C2CCCCC2)N2[C]N(c3ccc([N+](=O)[O-])cc3)N=C12
1277	CC(C)[C@@H]1C[C@@H](C2CCCCC2)N2[C]N(c3ccccc3)N=C12
1278	CC(C)[C@@H]1C[C@@H](CCO)C2=NN(C(C)C)[C]N21
1279	CC(C)[C@@H]1C[C@@H](CCO)C2=NN(C)[C]N21
1280	CC(C)[C@@H]1C[C@@H](CCO)C2=NN(C3CCCCC3)[C]N21
1281	CC(C)[C@@H]1C[C@@H](CCO)C2=NN(Cc3ccccc3)[C]N21
1282	CC(C)[C@@H]1C[C@@H](CCO)C2=NN(Cc3ccccn3)[C]N21
1283	CC(C)[C@@H]1C[C@@H](CCO)C2=NN([C@H](C)C3CCCCC3)[C]N21
1284	CC(C)[C@@H]1C[C@@H](CCO)C2=NN([C@H](C)c3cccc4ccccc34)[C]N21
1285	CC(C)[C@@H]1C[C@@H](CCO)C2=NN([C@H](C)c3ccccc3)[C]N21
1286	CC(C)[C@@H]1C[C@@H](CCO)C2=NN(c3c(Cl)cc(Cl)cc3Cl)[C]N21
1288	CC(C)[C@@H]1C[C@@H](CCO)C2=NN(c3c(F)cccc3F)[C]N21
1289	CC(C)[C@@H]1C[C@@H](CCO)C2=NN(c3cc(C(C)(C)C)cc(C(C)(C)C)c3)[C]N21
1291	CC(C)[C@@H]1C[C@@H](CCO)C2=NN(c3cc(Cl)cc(Cl)c3)[C]N21
1292	CC(C)[C@@H]1C[C@@H](CCO)C2=NN(c3cc(F)c(F)c(F)c3)[C]N21
1293	CC(C)[C@@H]1C[C@@H](CCO)C2=NN(c3cc(F)cc(F)c3)[C]N21
1294	CC(C)[C@@H]1C[C@@H](CCO)C2=NN(c3cc([N+](=O)[O-])cc([N+](=O)[O-])c3)[C]N21
1295	CC(C)[C@@H]1C[C@@H](CCO)C2=NN(c3ccc(Br)cc3)[C]N21
1296	CC(C)[C@@H]1C[C@@H](CCO)C2=NN(c3ccc(C#N)cc3)[C]N21
1297	CC(C)[C@@H]1C[C@@H](CCO)C2=NN(c3ccc(C(C)(C)C)cc3)[C]N21
1298	CC(C)[C@@H]1C[C@@H](CCO)C2=NN(c3ccc(C(F)(F)F)cc3)[C]N21
1299	CC(C)[C@@H]1C[C@@H](CCO)C2=NN(c3ccc(Cl)cc3)[C]N21
1300	CC(C)[C@@H]1C[C@@H](CCO)C2=NN(c3ccc(F)cc3)[C]N21
1301	CC(C)[C@@H]1C[C@@H](CCO)C2=NN(c3ccc(O)cc3)[C]N21
1302	CC(C)[C@@H]1C[C@@H](CCO)C2=NN(c3ccc([N+](=O)[O-])cc3)[C]N21
1303	CC(C)[C@@H]1C[C@@H](CCO)C2=NN(c3ccccc3)[C]N21
1304	CC(C)[C@@H]1C[C@@H](CO[Si](C(C)C)(C(C)C)C(C)C)N2[C]N(C(C)C)N=C12
1305	CC(C)[C@@H]1C[C@@H](CO[Si](C(C)C)(C(C)C)C(C)C)N2[C]N(C)N=C12
1306	CC(C)[C@@H]1C[C@@H](CO[Si](C(C)C)(C(C)C)C(C)C)N2[C]N(C3CCCCC3)N=C12
1307	CC(C)[C@@H]1C[C@@H](CO[Si](C(C)C)(C(C)C)C(C)C)N2[C]N(Cc3ccccc3)N=C12
1308	CC(C)[C@@H]1C[C@@H](CO[Si](C(C)C)(C(C)C)C(C)C)N2[C]N(Cc3ccccn3)N=C12
1309	CC(C)[C@@H]1C[C@@H](CO[Si](C(C)C)(C(C)C)C(C)C)N2[C]N([C@H](C)C3CCCCC3)N=C12
1310	CC(C)[C@@H]1C[C@@H](CO[Si](C(C)C)(C(C)C)C(C)C)N2[C]N([C@H](C)c3cccc4ccccc34)N=C12
1311	CC(C)[C@@H]1C[C@@H](CO[Si](C(C)C)(C(C)C)C(C)C)N2[C]N([C@H](C)c3ccccc3)N=C12
1312	CC(C)[C@@H]1C[C@@H](CO[Si](C(C)C)(C(C)C)C(C)C)N2[C]N(c3c(Cl)cc(Cl)cc3Cl)N=C12
1313	CC(C)[C@@H]1C[C@@H](CO[Si](C(C)C)(C(C)C)C(C)C)N2[C]N(c3c(F)c(F)c(F)c(F)c3F)N=C12
1314	CC(C)[C@@H]1C[C@@H](CO[Si](C(C)C)(C(C)C)C(C)C)N2[C]N(c3c(F)cccc3F)N=C12
1315	CC(C)[C@@H]1C[C@@H](CO[Si](C(C)C)(C(C)C)C(C)C)N2[C]N(c3cc(C(C)(C)C)cc(C(C)(C)C)c3)N=C12
1316	CC(C)[C@@H]1C[C@@H](CO[Si](C(C)C)(C(C)C)C(C)C)N2[C]N(c3cc(C(F)(F)F)cc(C(F)(F)F)c3)N=C12
1317	CC(C)[C@@H]1C[C@@H](CO[Si](C(C)C)(C(C)C)C(C)C)N2[C]N(c3cc(Cl)cc(Cl)c3)N=C12
1318	CC(C)[C@@H]1C[C@@H](CO[Si](C(C)C)(C(C)C)C(C)C)N2[C]N(c3cc(F)c(F)c(F)c3)N=C12
1319	CC(C)[C@@H]1C[C@@H](CO[Si](C(C)C)(C(C)C)C(C)C)N2[C]N(c3cc(F)cc(F)c3)N=C12
1320	CC(C)[C@@H]1C[C@@H](CO[Si](C(C)C)(C(C)C)C(C)C)N2[C]N(c3cc([N+](=O)[O-])cc([N+](=O)[O-])c3)N=C12
1321	CC(C)[C@@H]1C[C@@H](CO[Si](C(C)C)(C(C)C)C(C)C)N2[C]N(c3ccc(Br)cc3)N=C12
1322	CC(C)[C@@H]1C[C@@H](CO[Si](C(C)C)(C(C)C)C(C)C)N2[C]N(c3ccc(C#N)cc3)N=C12
1323	CC(C)[C@@H]1C[C@@H](CO[Si](C(C)C)(C(C)C)C(C)C)N2[C]N(c3ccc(C(C)(C)C)cc3)N=C12
1324	CC(C)[C@@H]1C[C@@H](CO[Si](C(C)C)(C(C)C)C(C)C)N2[C]N(c3ccc(C(F)(F)F)cc3)N=C12
1325	CC(C)[C@@H]1C[C@@H](CO[Si](C(C)C)(C(C)C)C(C)C)N2[C]N(c3ccc(Cl)cc3)N=C12
1326	CC(C)[C@@H]1C[C@@H](CO[Si](C(C)C)(C(C)C)C(C)C)N2[C]N(c3ccc(F)cc3)N=C12
1327	CC(C)[C@@H]1C[C@@H](CO[Si](C(C)C)(C(C)C)C(C)C)N2[C]N(c3ccc(O)cc3)N=C12
1328	CC(C)[C@@H]1C[C@@H](CO[Si](C(C)C)(C(C)C)C(C)C)N2[C]N(c3ccc([N+](=O)[O-])cc3)N=C12
1329	CC(C)[C@@H]1C[C@@H](CO[Si](C(C)C)(C(C)C)C(C)C)N2[C]N(c3ccccc3)N=C12
1330	CC(C)[C@@H]1C[C@@H](COc2ccccc2)N2[C]N(C(C)C)N=C12
1331	CC(C)[C@@H]1C[C@@H](COc2ccccc2)N2[C]N(C)N=C12
1332	CC(C)[C@@H]1C[C@@H](COc2ccccc2)N2[C]N(C3CCCCC3)N=C12
1333	CC(C)[C@@H]1C[C@@H](COc2ccccc2)N2[C]N(Cc3ccccc3)N=C12
1334	CC(C)[C@@H]1C[C@@H](COc2ccccc2)N2[C]N(Cc3ccccn3)N=C12
1335	CC(C)[C@@H]1C[C@@H](COc2ccccc2)N2[C]N([C@H](C)C3CCCCC3)N=C12
1336	CC(C)[C@@H]1C[C@@H](COc2ccccc2)N2[C]N([C@H](C)c3cccc4ccccc34)N=C12
1337	CC(C)[C@@H]1C[C@@H](COc2ccccc2)N2[C]N([C@H](C)c3ccccc3)N=C12
1338	CC(C)[C@@H]1C[C@@H](COc2ccccc2)N2[C]N(c3c(Cl)cc(Cl)cc3Cl)N=C12
1339	CC(C)[C@@H]1C[C@@H](COc2ccccc2)N2[C]N(c3c(F)c(F)c(F)c(F)c3F)N=C12
1340	CC(C)[C@@H]1C[C@@H](COc2ccccc2)N2[C]N(c3c(F)cccc3F)N=C12
1341	CC(C)[C@@H]1C[C@@H](COc2ccccc2)N2[C]N(c3cc(C(C)(C)C)cc(C(C)(C)C)c3)N=C12
1342	CC(C)[C@@H]1C[C@@H](COc2ccccc2)N2[C]N(c3cc(C(F)(F)F)cc(C(F)(F)F)c3)N=C12
1343	CC(C)[C@@H]1C[C@@H](COc2ccccc2)N2[C]N(c3cc(Cl)cc(Cl)c3)N=C12
1344	CC(C)[C@@H]1C[C@@H](COc2ccccc2)N2[C]N(c3cc(F)c(F)c(F)c3)N=C12
1345	CC(C)[C@@H]1C[C@@H](COc2ccccc2)N2[C]N(c3cc(F)cc(F)c3)N=C12
1346	CC(C)[C@@H]1C[C@@H](COc2ccccc2)N2[C]N(c3cc([N+](=O)[O-])cc([N+](=O)[O-])c3)N=C12
1347	CC(C)[C@@H]1C[C@@H](COc2ccccc2)N2[C]N(c3ccc(Br)cc3)N=C12
1348	CC(C)[C@@H]1C[C@@H](COc2ccccc2)N2[C]N(c3ccc(C#N)cc3)N=C12
1349	CC(C)[C@@H]1C[C@@H](COc2ccccc2)N2[C]N(c3ccc(C(C)(C)C)cc3)N=C12
1350	CC(C)[C@@H]1C[C@@H](COc2ccccc2)N2[C]N(c3ccc(C(F)(F)F)cc3)N=C12
1351	CC(C)[C@@H]1C[C@@H](COc2ccccc2)N2[C]N(c3ccc(Cl)cc3)N=C12
1352	CC(C)[C@@H]1C[C@@H](COc2ccccc2)N2[C]N(c3ccc(F)cc3)N=C12
1353	CC(C)[C@@H]1C[C@@H](COc2ccccc2)N2[C]N(c3ccc(O)cc3)N=C12
1354	CC(C)[C@@H]1C[C@@H](COc2ccccc2)N2[C]N(c3ccc([N+](=O)[O-])cc3)N=C12
1355	CC(C)[C@@H]1C[C@@H](COc2ccccc2)N2[C]N(c3ccccc3)N=C12
1356	CC(C)[C@@H]1C[C@@H](Cc2ccccc2)C2=NN(C(C)C)[C]N21
1357	CC(C)[C@@H]1C[C@@H](Cc2ccccc2)C2=NN(C)[C]N21
1358	CC(C)[C@@H]1C[C@@H](Cc2ccccc2)C2=NN(C3CCCCC3)[C]N21
1359	CC(C)[C@@H]1C[C@@H](Cc2ccccc2)C2=NN(Cc3ccccc3)[C]N21
1360	CC(C)[C@@H]1C[C@@H](Cc2ccccc2)C2=NN(Cc3ccccn3)[C]N21
1361	CC(C)[C@@H]1C[C@@H](Cc2ccccc2)C2=NN([C@H](C)C3CCCCC3)[C]N21
1362	CC(C)[C@@H]1C[C@@H](Cc2ccccc2)C2=NN([C@H](C)c3cccc4ccccc34)[C]N21
1363	CC(C)[C@@H]1C[C@@H](Cc2ccccc2)C2=NN([C@H](C)c3ccccc3)[C]N21
1364	CC(C)[C@@H]1C[C@@H](Cc2ccccc2)C2=NN(c3c(Cl)cc(Cl)cc3Cl)[C]N21
1365	CC(C)[C@@H]1C[C@@H](Cc2ccccc2)C2=NN(c3c(F)c(F)c(F)c(F)c3F)[C]N21
1366	CC(C)[C@@H]1C[C@@H](Cc2ccccc2)C2=NN(c3c(F)cccc3F)[C]N21
1367	CC(C)[C@@H]1C[C@@H](Cc2ccccc2)C2=NN(c3cc(C(C)(C)C)cc(C(C)(C)C)c3)[C]N21
1368	CC(C)[C@@H]1C[C@@H](Cc2ccccc2)C2=NN(c3cc(C(F)(F)F)cc(C(F)(F)F)c3)[C]N21
1369	CC(C)[C@@H]1C[C@@H](Cc2ccccc2)C2=NN(c3cc(Cl)cc(Cl)c3)[C]N21
1370	CC(C)[C@@H]1C[C@@H](Cc2ccccc2)C2=NN(c3cc(F)c(F)c(F)c3)[C]N21
1371	CC(C)[C@@H]1C[C@@H](Cc2ccccc2)C2=NN(c3cc(F)cc(F)c3)[C]N21
1372	CC(C)[C@@H]1C[C@@H](Cc2ccccc2)C2=NN(c3cc([N+](=O)[O-])cc([N+](=O)[O-])c3)[C]N21
1373	CC(C)[C@@H]1C[C@@H](Cc2ccccc2)C2=NN(c3ccc(Br)cc3)[C]N21
1374	CC(C)[C@@H]1C[C@@H](Cc2ccccc2)C2=NN(c3ccc(C#N)cc3)[C]N21
1375	CC(C)[C@@H]1C[C@@H](Cc2ccccc2)C2=NN(c3ccc(C(C)(C)C)cc3)[C]N21
1376	CC(C)[C@@H]1C[C@@H](Cc2ccccc2)C2=NN(c3ccc(C(F)(F)F)cc3)[C]N21
1377	CC(C)[C@@H]1C[C@@H](Cc2ccccc2)C2=NN(c3ccc(Cl)cc3)[C]N21
1378	CC(C)[C@@H]1C[C@@H](Cc2ccccc2)C2=NN(c3ccc(F)cc3)[C]N21
1379	CC(C)[C@@H]1C[C@@H](Cc2ccccc2)C2=NN(c3ccc(O)cc3)[C]N21
1380	CC(C)[C@@H]1C[C@@H](Cc2ccccc2)C2=NN(c3ccc([N+](=O)[O-])cc3)[C]N21
1381	CC(C)[C@@H]1C[C@@H](Cc2ccccc2)C2=NN(c3ccccc3)[C]N21
1382	CC(C)[C@@H]1C[C@@H](Cc2ccccc2)N2[C]N(C(C)C)N=C12
1383	CC(C)[C@@H]1C[C@@H](Cc2ccccc2)N2[C]N(C)N=C12
1384	CC(C)[C@@H]1C[C@@H](Cc2ccccc2)N2[C]N(C3CCCCC3)N=C12
1385	CC(C)[C@@H]1C[C@@H](Cc2ccccc2)N2[C]N(Cc3ccccc3)N=C12
1386	CC(C)[C@@H]1C[C@@H](Cc2ccccc2)N2[C]N(Cc3ccccn3)N=C12
1387	CC(C)[C@@H]1C[C@@H](Cc2ccccc2)N2[C]N([C@H](C)C3CCCCC3)N=C12
1388	CC(C)[C@@H]1C[C@@H](Cc2ccccc2)N2[C]N([C@H](C)c3cccc4ccccc34)N=C12
1389	CC(C)[C@@H]1C[C@@H](Cc2ccccc2)N2[C]N([C@H](C)c3ccccc3)N=C12
1390	CC(C)[C@@H]1C[C@@H](Cc2ccccc2)N2[C]N(c3c(Cl)cc(Cl)cc3Cl)N=C12
1391	CC(C)[C@@H]1C[C@@H](Cc2ccccc2)N2[C]N(c3c(F)c(F)c(F)c(F)c3F)N=C12
1392	CC(C)[C@@H]1C[C@@H](Cc2ccccc2)N2[C]N(c3c(F)cccc3F)N=C12
1393	CC(C)[C@@H]1C[C@@H](Cc2ccccc2)N2[C]N(c3cc(C(C)(C)C)cc(C(C)(C)C)c3)N=C12
1395	CC(C)[C@@H]1C[C@@H](Cc2ccccc2)N2[C]N(c3cc(Cl)cc(Cl)c3)N=C12
1396	CC(C)[C@@H]1C[C@@H](Cc2ccccc2)N2[C]N(c3cc(F)c(F)c(F)c3)N=C12
1397	CC(C)[C@@H]1C[C@@H](Cc2ccccc2)N2[C]N(c3cc(F)cc(F)c3)N=C12
1398	CC(C)[C@@H]1C[C@@H](Cc2ccccc2)N2[C]N(c3cc([N+](=O)[O-])cc([N+](=O)[O-])c3)N=C12
1399	CC(C)[C@@H]1C[C@@H](Cc2ccccc2)N2[C]N(c3ccc(Br)cc3)N=C12
1400	CC(C)[C@@H]1C[C@@H](Cc2ccccc2)N2[C]N(c3ccc(C#N)cc3)N=C12
1401	CC(C)[C@@H]1C[C@@H](Cc2ccccc2)N2[C]N(c3ccc(C(C)(C)C)cc3)N=C12
1402	CC(C)[C@@H]1C[C@@H](Cc2ccccc2)N2[C]N(c3ccc(C(F)(F)F)cc3)N=C12
1403	CC(C)[C@@H]1C[C@@H](Cc2ccccc2)N2[C]N(c3ccc(Cl)cc3)N=C12
1404	CC(C)[C@@H]1C[C@@H](Cc2ccccc2)N2[C]N(c3ccc(F)cc3)N=C12
1405	CC(C)[C@@H]1C[C@@H](Cc2ccccc2)N2[C]N(c3ccc(O)cc3)N=C12
1406	CC(C)[C@@H]1C[C@@H](Cc2ccccc2)N2[C]N(c3ccc([N+](=O)[O-])cc3)N=C12
1407	CC(C)[C@@H]1C[C@@H](Cc2ccccc2)N2[C]N(c3ccccc3)N=C12
1408	CC(C)[C@@H]1C[C@@H](Cl)C2=NN(C(C)C)[C]N21
1409	CC(C)[C@@H]1C[C@@H](Cl)C2=NN(C)[C]N21
1410	CC(C)[C@@H]1C[C@@H](Cl)C2=NN(C3CCCCC3)[C]N21
1411	CC(C)[C@@H]1C[C@@H](Cl)C2=NN(Cc3ccccc3)[C]N21
1412	CC(C)[C@@H]1C[C@@H](Cl)C2=NN(Cc3ccccn3)[C]N21
1413	CC(C)[C@@H]1C[C@@H](Cl)C2=NN([C@H](C)C3CCCCC3)[C]N21
1414	CC(C)[C@@H]1C[C@@H](Cl)C2=NN([C@H](C)c3cccc4ccccc34)[C]N21
1415	CC(C)[C@@H]1C[C@@H](Cl)C2=NN([C@H](C)c3ccccc3)[C]N21
1416	CC(C)[C@@H]1C[C@@H](Cl)C2=NN(c3c(Cl)cc(Cl)cc3Cl)[C]N21
1417	CC(C)[C@@H]1C[C@@H](Cl)C2=NN(c3c(F)c(F)c(F)c(F)c3F)[C]N21
1418	CC(C)[C@@H]1C[C@@H](Cl)C2=NN(c3c(F)cccc3F)[C]N21
1419	CC(C)[C@@H]1C[C@@H](Cl)C2=NN(c3cc(C(C)(C)C)cc(C(C)(C)C)c3)[C]N21
1420	CC(C)[C@@H]1C[C@@H](Cl)C2=NN(c3cc(C(F)(F)F)cc(C(F)(F)F)c3)[C]N21
1421	CC(C)[C@@H]1C[C@@H](Cl)C2=NN(c3cc(Cl)cc(Cl)c3)[C]N21
1422	CC(C)[C@@H]1C[C@@H](Cl)C2=NN(c3cc(F)c(F)c(F)c3)[C]N21
1423	CC(C)[C@@H]1C[C@@H](Cl)C2=NN(c3cc(F)cc(F)c3)[C]N21
1424	CC(C)[C@@H]1C[C@@H](Cl)C2=NN(c3cc([N+](=O)[O-])cc([N+](=O)[O-])c3)[C]N21
1425	CC(C)[C@@H]1C[C@@H](Cl)C2=NN(c3ccc(Br)cc3)[C]N21
1426	CC(C)[C@@H]1C[C@@H](Cl)C2=NN(c3ccc(C#N)cc3)[C]N21
1427	CC(C)[C@@H]1C[C@@H](Cl)C2=NN(c3ccc(C(C)(C)C)cc3)[C]N21
1428	CC(C)[C@@H]1C[C@@H](Cl)C2=NN(c3ccc(C(F)(F)F)cc3)[C]N21
1429	CC(C)[C@@H]1C[C@@H](Cl)C2=NN(c3ccc(Cl)cc3)[C]N21
1430	CC(C)[C@@H]1C[C@@H](Cl)C2=NN(c3ccc(F)cc3)[C]N21
1431	CC(C)[C@@H]1C[C@@H](Cl)C2=NN(c3ccc(O)cc3)[C]N21
1432	CC(C)[C@@H]1C[C@@H](Cl)C2=NN(c3ccc([N+](=O)[O-])cc3)[C]N21
1433	CC(C)[C@@H]1C[C@@H](Cl)C2=NN(c3ccccc3)[C]N21
1434	CC(C)[C@@H]1C[C@@H](F)C2=NN(C(C)C)[C]N21
1435	CC(C)[C@@H]1C[C@@H](F)C2=NN(C)[C]N21
1436	CC(C)[C@@H]1C[C@@H](F)C2=NN(C3CCCCC3)[C]N21
1437	CC(C)[C@@H]1C[C@@H](F)C2=NN(Cc3ccccc3)[C]N21
1438	CC(C)[C@@H]1C[C@@H](F)C2=NN(Cc3ccccn3)[C]N21
1439	CC(C)[C@@H]1C[C@@H](F)C2=NN([C@H](C)C3CCCCC3)[C]N21
1440	CC(C)[C@@H]1C[C@@H](F)C2=NN([C@H](C)c3cccc4ccccc34)[C]N21
1441	CC(C)[C@@H]1C[C@@H](F)C2=NN([C@H](C)c3ccccc3)[C]N21
1442	CC(C)[C@@H]1C[C@@H](F)C2=NN(c3c(Cl)cc(Cl)cc3Cl)[C]N21
1443	CC(C)[C@@H]1C[C@@H](F)C2=NN(c3c(F)c(F)c(F)c(F)c3F)[C]N21
1444	CC(C)[C@@H]1C[C@@H](F)C2=NN(c3c(F)cccc3F)[C]N21
1445	CC(C)[C@@H]1C[C@@H](F)C2=NN(c3cc(C(C)(C)C)cc(C(C)(C)C)c3)[C]N21
1446	CC(C)[C@@H]1C[C@@H](F)C2=NN(c3cc(C(F)(F)F)cc(C(F)(F)F)c3)[C]N21
1447	CC(C)[C@@H]1C[C@@H](F)C2=NN(c3cc(Cl)cc(Cl)c3)[C]N21
1448	CC(C)[C@@H]1C[C@@H](F)C2=NN(c3cc(F)c(F)c(F)c3)[C]N21
1449	CC(C)[C@@H]1C[C@@H](F)C2=NN(c3cc(F)cc(F)c3)[C]N21
1450	CC(C)[C@@H]1C[C@@H](F)C2=NN(c3cc([N+](=O)[O-])cc([N+](=O)[O-])c3)[C]N21
1451	CC(C)[C@@H]1C[C@@H](F)C2=NN(c3ccc(Br)cc3)[C]N21
1452	CC(C)[C@@H]1C[C@@H](F)C2=NN(c3ccc(C#N)cc3)[C]N21
1454	CC(C)[C@@H]1C[C@@H](F)C2=NN(c3ccc(C(F)(F)F)cc3)[C]N21
1455	CC(C)[C@@H]1C[C@@H](F)C2=NN(c3ccc(Cl)cc3)[C]N21
1456	CC(C)[C@@H]1C[C@@H](F)C2=NN(c3ccc(F)cc3)[C]N21
1457	CC(C)[C@@H]1C[C@@H](F)C2=NN(c3ccc(O)cc3)[C]N21
1458	CC(C)[C@@H]1C[C@@H](F)C2=NN(c3ccc([N+](=O)[O-])cc3)[C]N21
1459	CC(C)[C@@H]1C[C@@H](F)C2=NN(c3ccccc3)[C]N21
1460	CC(C)[C@@H]1C[C@@H](c2ccccc2)C2=NN(C(C)C)[C]N21
1461	CC(C)[C@@H]1C[C@@H](c2ccccc2)C2=NN(C)[C]N21
1462	CC(C)[C@@H]1C[C@@H](c2ccccc2)C2=NN(C3CCCCC3)[C]N21
1463	CC(C)[C@@H]1C[C@@H](c2ccccc2)C2=NN(Cc3ccccc3)[C]N21
1464	CC(C)[C@@H]1C[C@@H](c2ccccc2)C2=NN(Cc3ccccn3)[C]N21
1465	CC(C)[C@@H]1C[C@@H](c2ccccc2)C2=NN([C@H](C)C3CCCCC3)[C]N21
1466	CC(C)[C@@H]1C[C@@H](c2ccccc2)C2=NN([C@H](C)c3cccc4ccccc34)[C]N21
1467	CC(C)[C@@H]1C[C@@H](c2ccccc2)C2=NN([C@H](C)c3ccccc3)[C]N21
1468	CC(C)[C@@H]1C[C@@H](c2ccccc2)C2=NN(c3c(Cl)cc(Cl)cc3Cl)[C]N21
1469	CC(C)[C@@H]1C[C@@H](c2ccccc2)C2=NN(c3c(F)c(F)c(F)c(F)c3F)[C]N21
1470	CC(C)[C@@H]1C[C@@H](c2ccccc2)C2=NN(c3c(F)cccc3F)[C]N21
1471	CC(C)[C@@H]1C[C@@H](c2ccccc2)C2=NN(c3cc(C(C)(C)C)cc(C(C)(C)C)c3)[C]N21
1472	CC(C)[C@@H]1C[C@@H](c2ccccc2)C2=NN(c3cc(C(F)(F)F)cc(C(F)(F)F)c3)[C]N21
1473	CC(C)[C@@H]1C[C@@H](c2ccccc2)C2=NN(c3cc(Cl)cc(Cl)c3)[C]N21
1474	CC(C)[C@@H]1C[C@@H](c2ccccc2)C2=NN(c3cc(F)c(F)c(F)c3)[C]N21
1475	CC(C)[C@@H]1C[C@@H](c2ccccc2)C2=NN(c3cc(F)cc(F)c3)[C]N21
1476	CC(C)[C@@H]1C[C@@H](c2ccccc2)C2=NN(c3cc([N+](=O)[O-])cc([N+](=O)[O-])c3)[C]N21
1478	CC(C)[C@@H]1C[C@@H](c2ccccc2)C2=NN(c3ccc(C#N)cc3)[C]N21
1479	CC(C)[C@@H]1C[C@@H](c2ccccc2)C2=NN(c3ccc(C(C)(C)C)cc3)[C]N21
1480	CC(C)[C@@H]1C[C@@H](c2ccccc2)C2=NN(c3ccc(C(F)(F)F)cc3)[C]N21
1481	CC(C)[C@@H]1C[C@@H](c2ccccc2)C2=NN(c3ccc(Cl)cc3)[C]N21
1482	CC(C)[C@@H]1C[C@@H](c2ccccc2)C2=NN(c3ccc(F)cc3)[C]N21
1483	CC(C)[C@@H]1C[C@@H](c2ccccc2)C2=NN(c3ccc(O)cc3)[C]N21
1484	CC(C)[C@@H]1C[C@@H](c2ccccc2)C2=NN(c3ccc([N+](=O)[O-])cc3)[C]N21
1485	CC(C)[C@@H]1C[C@@H](c2ccccc2)C2=NN(c3ccccc3)[C]N21
1486	CC(C)[C@@H]1C[C@@H](c2ccccc2)N2[C]N(C(C)C)N=C12
1487	CC(C)[C@@H]1C[C@@H](c2ccccc2)N2[C]N(C)N=C12
1488	CC(C)[C@@H]1C[C@@H](c2ccccc2)N2[C]N(C3CCCCC3)N=C12
1489	CC(C)[C@@H]1C[C@@H](c2ccccc2)N2[C]N(Cc3ccccc3)N=C12
1490	CC(C)[C@@H]1C[C@@H](c2ccccc2)N2[C]N(Cc3ccccn3)N=C12
1491	CC(C)[C@@H]1C[C@@H](c2ccccc2)N2[C]N([C@H](C)C3CCCCC3)N=C12
1492	CC(C)[C@@H]1C[C@@H](c2ccccc2)N2[C]N([C@H](C)c3cccc4ccccc34)N=C12
1493	CC(C)[C@@H]1C[C@@H](c2ccccc2)N2[C]N([C@H](C)c3ccccc3)N=C12
1494	CC(C)[C@@H]1C[C@@H](c2ccccc2)N2[C]N(c3c(Cl)cc(Cl)cc3Cl)N=C12
1495	CC(C)[C@@H]1C[C@@H](c2ccccc2)N2[C]N(c3c(F)c(F)c(F)c(F)c3F)N=C12
1496	CC(C)[C@@H]1C[C@@H](c2ccccc2)N2[C]N(c3c(F)cccc3F)N=C12
1497	CC(C)[C@@H]1C[C@@H](c2ccccc2)N2[C]N(c3cc(C(C)(C)C)cc(C(C)(C)C)c3)N=C12
1498	CC(C)[C@@H]1C[C@@H](c2ccccc2)N2[C]N(c3cc(C(F)(F)F)cc(C(F)(F)F)c3)N=C12
1499	CC(C)[C@@H]1C[C@@H](c2ccccc2)N2[C]N(c3cc(Cl)cc(Cl)c3)N=C12
1500	CC(C)[C@@H]1C[C@@H](c2ccccc2)N2[C]N(c3cc(F)c(F)c(F)c3)N=C12
1501	CC(C)[C@@H]1C[C@@H](c2ccccc2)N2[C]N(c3cc(F)cc(F)c3)N=C12
1502	CC(C)[C@@H]1C[C@@H](c2ccccc2)N2[C]N(c3cc([N+](=O)[O-])cc([N+](=O)[O-])c3)N=C12
1504	CC(C)[C@@H]1C[C@@H](c2ccccc2)N2[C]N(c3ccc(C#N)cc3)N=C12
1505	CC(C)[C@@H]1C[C@@H](c2ccccc2)N2[C]N(c3ccc(C(C)(C)C)cc3)N=C12
1506	CC(C)[C@@H]1C[C@@H](c2ccccc2)N2[C]N(c3ccc(C(F)(F)F)cc3)N=C12
1507	CC(C)[C@@H]1C[C@@H](c2ccccc2)N2[C]N(c3ccc(Cl)cc3)N=C12
1508	CC(C)[C@@H]1C[C@@H](c2ccccc2)N2[C]N(c3ccc(F)cc3)N=C12
1509	CC(C)[C@@H]1C[C@@H](c2ccccc2)N2[C]N(c3ccc(O)cc3)N=C12
1510	CC(C)[C@@H]1C[C@@H](c2ccccc2)N2[C]N(c3ccc([N+](=O)[O-])cc3)N=C12
1511	CC(C)[C@@H]1C[C@@H](c2ccccc2)N2[C]N(c3ccccc3)N=C12
1512	CC(C)[C@H]1CCC2=CS[C]N21
1513	CC(C)[C@H]1CCN2[C]SC=C12
1514	CC(C)[C@H]1COC2=NN(C(C)C)[C]N21
1515	CC(C)[C@H]1COC2=NN(C)[C]N21
1516	CC(C)[C@H]1COC2=NN(C3CCCCC3)[C]N21
1517	CC(C)[C@H]1COC2=NN(Cc3ccccc3)[C]N21
1518	CC(C)[C@H]1COC2=NN(Cc3ccccn3)[C]N21
1519	CC(C)[C@H]1COC2=NN([C@H](C)C3CCCCC3)[C]N21
1520	CC(C)[C@H]1COC2=NN([C@H](C)c3cccc4ccccc34)[C]N21
1521	CC(C)[C@H]1COC2=NN([C@H](C)c3ccccc3)[C]N21
1522	CC(C)[C@H]1COC2=NN(c3c(Cl)cc(Cl)cc3Cl)[C]N21
1523	CC(C)[C@H]1COC2=NN(c3c(F)c(F)c(F)c(F)c3F)[C]N21
1524	CC(C)[C@H]1COC2=NN(c3c(F)cccc3F)[C]N21
1525	CC(C)[C@H]1COC2=NN(c3cc(C(C)(C)C)cc(C(C)(C)C)c3)[C]N21
1526	CC(C)[C@H]1COC2=NN(c3cc(C(F)(F)F)cc(C(F)(F)F)c3)[C]N21
1527	CC(C)[C@H]1COC2=NN(c3cc(Cl)cc(Cl)c3)[C]N21
1528	CC(C)[C@H]1COC2=NN(c3cc(F)c(F)c(F)c3)[C]N21
1529	CC(C)[C@H]1COC2=NN(c3cc(F)cc(F)c3)[C]N21
1530	CC(C)[C@H]1COC2=NN(c3cc([N+](=O)[O-])cc([N+](=O)[O-])c3)[C]N21
1531	CC(C)[C@H]1COC2=NN(c3ccc(Br)cc3)[C]N21
1532	CC(C)[C@H]1COC2=NN(c3ccc(C#N)cc3)[C]N21
1533	CC(C)[C@H]1COC2=NN(c3ccc(C(C)(C)C)cc3)[C]N21
1534	CC(C)[C@H]1COC2=NN(c3ccc(C(F)(F)F)cc3)[C]N21
1535	CC(C)[C@H]1COC2=NN(c3ccc(Cl)cc3)[C]N21
1536	CC(C)[C@H]1COC2=NN(c3ccc(F)cc3)[C]N21
1537	CC(C)[C@H]1COC2=NN(c3ccc(O)cc3)[C]N21
1538	CC(C)[C@H]1COC2=NN(c3ccc([N+](=O)[O-])cc3)[C]N21
1539	CC(C)[C@H]1COC2=NN(c3ccccc3)[C]N21
1540	CC(C)[C@H]1COCC2=NN(C(C)C)[C]N21
1541	CC(C)[C@H]1COCC2=NN(C)[C]N21
1542	CC(C)[C@H]1COCC2=NN(C3CCCCC3)[C]N21
1543	CC(C)[C@H]1COCC2=NN(Cc3ccccc3)[C]N21
1544	CC(C)[C@H]1COCC2=NN(Cc3ccccn3)[C]N21
1545	CC(C)[C@H]1COCC2=NN([C@H](C)C3CCCCC3)[C]N21
1546	CC(C)[C@H]1COCC2=NN([C@H](C)c3cccc4ccccc34)[C]N21
1547	CC(C)[C@H]1COCC2=NN([C@H](C)c3ccccc3)[C]N21
1548	CC(C)[C@H]1COCC2=NN(c3c(Cl)cc(Cl)cc3Cl)[C]N21
1549	CC(C)[C@H]1COCC2=NN(c3c(F)c(F)c(F)c(F)c3F)[C]N21
1550	CC(C)[C@H]1COCC2=NN(c3c(F)cccc3F)[C]N21
1551	CC(C)[C@H]1COCC2=NN(c3cc(C(C)(C)C)cc(C(C)(C)C)c3)[C]N21
1552	CC(C)[C@H]1COCC2=NN(c3cc(C(F)(F)F)cc(C(F)(F)F)c3)[C]N21
1553	CC(C)[C@H]1COCC2=NN(c3cc(Cl)cc(Cl)c3)[C]N21
1554	CC(C)[C@H]1COCC2=NN(c3cc(F)c(F)c(F)c3)[C]N21
1555	CC(C)[C@H]1COCC2=NN(c3cc(F)cc(F)c3)[C]N21
1556	CC(C)[C@H]1COCC2=NN(c3cc([N+](=O)[O-])cc([N+](=O)[O-])c3)[C]N21
1557	CC(C)[C@H]1COCC2=NN(c3ccc(Br)cc3)[C]N21
1558	CC(C)[C@H]1COCC2=NN(c3ccc(C#N)cc3)[C]N21
1559	CC(C)[C@H]1COCC2=NN(c3ccc(C(C)(C)C)cc3)[C]N21
1560	CC(C)[C@H]1COCC2=NN(c3ccc(C(F)(F)F)cc3)[C]N21
1561	CC(C)[C@H]1COCC2=NN(c3ccc(Cl)cc3)[C]N21
1562	CC(C)[C@H]1COCC2=NN(c3ccc(F)cc3)[C]N21
1563	CC(C)[C@H]1COCC2=NN(c3ccc(O)cc3)[C]N21
1564	CC(C)[C@H]1COCC2=NN(c3ccc([N+](=O)[O-])cc3)[C]N21
1565	CC(C)[C@H]1COCC2=NN(c3ccccc3)[C]N21
1566	CC(C)[C@H]1COCC2=NS[C]N21
1568	CC(C)[C@H]1C[C@H](C(C)(C)C)N2[C]SC=C12
1569	CC(C)[C@H]1C[C@H](C(C)C)N2[C]SC=C12
1570	CC(C)[C@H]1C[C@H](C(F)(F)F)C2=CS[C]N21
1571	CC(C)[C@H]1C[C@H](C(F)(c2ccccc2)c2ccccc2)N2[C]SC=C12
1572	CC(C)[C@H]1C[C@H](C(O)(c2cc(C(F)(F)F)cc(C(F)(F)F)c2)c2cc(C(F)(F)F)cc(C(F)(F)F)c2)N2[C]SC=C12
1573	CC(C)[C@H]1C[C@H](C(O)(c2ccccc2)c2ccccc2)N2[C]SC=C12
1574	CC(C)[C@H]1C[C@H](C(O[Si](C)(C)C)(c2ccccc2)c2ccccc2)N2[C]SC=C12
1575	CC(C)[C@H]1C[C@H](C(c2ccccc2)c2ccccc2)N2[C]SC=C12
1576	CC(C)[C@H]1C[C@H](C)C2=CS[C]N21
1577	CC(C)[C@H]1C[C@H](C)N2[C]SC=C12
1578	CC(C)[C@H]1C[C@H](C2CCCCC2)N2[C]SC=C12
1579	CC(C)[C@H]1C[C@H](CCO)C2=CS[C]N21
1580	CC(C)[C@H]1C[C@H](CO[Si](C(C)C)(C(C)C)C(C)C)N2[C]SC=C12
1581	CC(C)[C@H]1C[C@H](COc2ccccc2)N2[C]SC=C12
1582	CC(C)[C@H]1C[C@H](Cc2ccccc2)C2=CS[C]N21
1583	CC(C)[C@H]1C[C@H](Cc2ccccc2)N2[C]SC=C12
1584	CC(C)[C@H]1C[C@H](Cl)C2=CS[C]N21
1585	CC(C)[C@H]1C[C@H](F)C2=CS[C]N21
1586	CC(C)[C@H]1C[C@H](c2ccccc2)C2=CS[C]N21
1588	CC(C)[C@H]1[C@H](C(C)C)N(C(C)C)[C]N1C(C)C
1589	CC(C)[C@H]1[C@H](C(C)C)N(C)[C]N1C
1590	CC(C)[C@H]1[C@H](C(C)C)N(C2CCCCC2)[C]N1C1CCCCC1
1591	CC(C)[C@H]1[C@H](C(C)C)N(Cc2ccccc2)[C]N1Cc1ccccc1
1592	CC(C)[C@H]1[C@H](C(C)C)N(Cc2ccccn2)[C]N1Cc1ccccn1
1593	CC(C)[C@H]1[C@H](C(C)C)N([C@H](C)C2CCCCC2)[C]N1[C@H](C)C1CCCCC1
1594	CC(C)[C@H]1[C@H](C(C)C)N([C@H](C)c2cccc3ccccc23)[C]N1[C@H](C)c1cccc2ccccc12
1595	CC(C)[C@H]1[C@H](C(C)C)N([C@H](C)c2ccccc2)[C]N1[C@H](C)c1ccccc1
1596	CC(C)[C@H]1[C@H](C(C)C)N(c2c(Cl)cc(Cl)cc2Cl)[C]N1c1c(Cl)cc(Cl)cc1Cl
1597	CC(C)[C@H]1[C@H](C(C)C)N(c2c(F)c(F)c(F)c(F)c2F)[C]N1c1c(F)c(F)c(F)c(F)c1F
1598	CC(C)[C@H]1[C@H](C(C)C)N(c2c(F)cccc2F)[C]N1c1c(F)cccc1F
1599	CC(C)[C@H]1[C@H](C(C)C)N(c2cc(C(C)(C)C)cc(C(C)(C)C)c2)[C]N1c1cc(C(C)(C)C)cc(C(C)(C)C)c1
1600	CC(C)[C@H]1[C@H](C(C)C)N(c2cc(C(F)(F)F)cc(C(F)(F)F)c2)[C]N1c1cc(C(F)(F)F)cc(C(F)(F)F)c1
1601	CC(C)[C@H]1[C@H](C(C)C)N(c2cc(Cl)cc(Cl)c2)[C]N1c1cc(Cl)cc(Cl)c1
1602	CC(C)[C@H]1[C@H](C(C)C)N(c2cc(F)c(F)c(F)c2)[C]N1c1cc(F)c(F)c(F)c1
1603	CC(C)[C@H]1[C@H](C(C)C)N(c2cc(F)cc(F)c2)[C]N1c1cc(F)cc(F)c1
1604	CC(C)[C@H]1[C@H](C(C)C)N(c2cc([N+](=O)[O-])cc([N+](=O)[O-])c2)[C]N1c1cc([N+](=O)[O-])cc([N+](=O)[O-])c1
1605	CC(C)[C@H]1[C@H](C(C)C)N(c2ccc(Br)cc2)[C]N1c1ccc(Br)cc1
1606	CC(C)[C@H]1[C@H](C(C)C)N(c2ccc(C#N)cc2)[C]N1c1ccc(C#N)cc1
1607	CC(C)[C@H]1[C@H](C(C)C)N(c2ccc(C(C)(C)C)cc2)[C]N1c1ccc(C(C)(C)C)cc1
1608	CC(C)[C@H]1[C@H](C(C)C)N(c2ccc(C(F)(F)F)cc2)[C]N1c1ccc(C(F)(F)F)cc1
1609	CC(C)[C@H]1[C@H](C(C)C)N(c2ccc(Cl)cc2)[C]N1c1ccc(Cl)cc1
1610	CC(C)[C@H]1[C@H](C(C)C)N(c2ccc(F)cc2)[C]N1c1ccc(F)cc1
1611	CC(C)[C@H]1[C@H](C(C)C)N(c2ccc(O)cc2)[C]N1c1ccc(O)cc1
1612	CC(C)[C@H]1[C@H](C(C)C)N(c2ccc([N+](=O)[O-])cc2)[C]N1c1ccc([N+](=O)[O-])cc1
1613	CC(C)[C@H]1[C@H](C(C)C)N(c2ccccc2)[C]N1c1ccccc1
1614	CC(C)[Si](OC[C@@H]1CCC2=NN(C)[C]N21)(C(C)C)C(C)C
1615	CC(C)[Si](OC[C@@H]1CCC2=NN(C3CCCCC3)[C]N21)(C(C)C)C(C)C
1616	CC(C)[Si](OC[C@@H]1CCC2=NN(Cc3ccccc3)[C]N21)(C(C)C)C(C)C
1617	CC(C)[Si](OC[C@@H]1CCC2=NN(Cc3ccccn3)[C]N21)(C(C)C)C(C)C
1618	CC(C)[Si](OC[C@@H]1CCC2=NN([C@H](C)C3CCCCC3)[C]N21)(C(C)C)C(C)C
1619	CC(C)[Si](OC[C@@H]1CCC2=NN([C@H](C)c3cccc4ccccc34)[C]N21)(C(C)C)C(C)C
1620	CC(C)[Si](OC[C@@H]1CCC2=NN([C@H](C)c3ccccc3)[C]N21)(C(C)C)C(C)C
1621	CC(C)[Si](OC[C@@H]1CCC2=NN(c3c(Cl)cc(Cl)cc3Cl)[C]N21)(C(C)C)C(C)C
1622	CC(C)[Si](OC[C@@H]1CCC2=NN(c3c(F)c(F)c(F)c(F)c3F)[C]N21)(C(C)C)C(C)C
1623	CC(C)[Si](OC[C@@H]1CCC2=NN(c3c(F)cccc3F)[C]N21)(C(C)C)C(C)C
1624	CC(C)[Si](OC[C@@H]1CCC2=NN(c3cc(C(C)(C)C)cc(C(C)(C)C)c3)[C]N21)(C(C)C)C(C)C
1625	CC(C)[Si](OC[C@@H]1CCC2=NN(c3cc(C(F)(F)F)cc(C(F)(F)F)c3)[C]N21)(C(C)C)C(C)C
1626	CC(C)[Si](OC[C@@H]1CCC2=NN(c3cc(Cl)cc(Cl)c3)[C]N21)(C(C)C)C(C)C
1627	CC(C)[Si](OC[C@@H]1CCC2=NN(c3cc(F)c(F)c(F)c3)[C]N21)(C(C)C)C(C)C
1628	CC(C)[Si](OC[C@@H]1CCC2=NN(c3cc(F)cc(F)c3)[C]N21)(C(C)C)C(C)C
1629	CC(C)[Si](OC[C@@H]1CCC2=NN(c3cc([N+](=O)[O-])cc([N+](=O)[O-])c3)[C]N21)(C(C)C)C(C)C
1630	CC(C)[Si](OC[C@@H]1CCC2=NN(c3ccc(Br)cc3)[C]N21)(C(C)C)C(C)C
1631	CC(C)[Si](OC[C@@H]1CCC2=NN(c3ccc(C#N)cc3)[C]N21)(C(C)C)C(C)C
1632	CC(C)[Si](OC[C@@H]1CCC2=NN(c3ccc(C(C)(C)C)cc3)[C]N21)(C(C)C)C(C)C
1633	CC(C)[Si](OC[C@@H]1CCC2=NN(c3ccc(C(F)(F)F)cc3)[C]N21)(C(C)C)C(C)C
1634	CC(C)[Si](OC[C@@H]1CCC2=NN(c3ccc(Cl)cc3)[C]N21)(C(C)C)C(C)C
1635	CC(C)[Si](OC[C@@H]1CCC2=NN(c3ccc(F)cc3)[C]N21)(C(C)C)C(C)C
1636	CC(C)[Si](OC[C@@H]1CCC2=NN(c3ccc(O)cc3)[C]N21)(C(C)C)C(C)C
1637	CC(C)[Si](OC[C@@H]1CCC2=NN(c3ccc([N+](=O)[O-])cc3)[C]N21)(C(C)C)C(C)C
1638	CC(C)[Si](OC[C@@H]1CCC2=NN(c3ccccc3)[C]N21)(C(C)C)C(C)C
1639	CC(C)[Si](OC[C@@H]1C[C@@H](C#N)C2=NN(C)[C]N21)(C(C)C)C(C)C
1640	CC(C)[Si](OC[C@@H]1C[C@@H](C#N)C2=NN(C3CCCCC3)[C]N21)(C(C)C)C(C)C
1641	CC(C)[Si](OC[C@@H]1C[C@@H](C#N)C2=NN(Cc3ccccc3)[C]N21)(C(C)C)C(C)C
1642	CC(C)[Si](OC[C@@H]1C[C@@H](C#N)C2=NN(Cc3ccccn3)[C]N21)(C(C)C)C(C)C
1643	CC(C)[Si](OC[C@@H]1C[C@@H](C#N)C2=NN([C@H](C)C3CCCCC3)[C]N21)(C(C)C)C(C)C
1644	CC(C)[Si](OC[C@@H]1C[C@@H](C#N)C2=NN([C@H](C)c3cccc4ccccc34)[C]N21)(C(C)C)C(C)C
1645	CC(C)[Si](OC[C@@H]1C[C@@H](C#N)C2=NN([C@H](C)c3ccccc3)[C]N21)(C(C)C)C(C)C
1646	CC(C)[Si](OC[C@@H]1C[C@@H](C#N)C2=NN(c3c(Cl)cc(Cl)cc3Cl)[C]N21)(C(C)C)C(C)C
1647	CC(C)[Si](OC[C@@H]1C[C@@H](C#N)C2=NN(c3c(F)c(F)c(F)c(F)c3F)[C]N21)(C(C)C)C(C)C
1648	CC(C)[Si](OC[C@@H]1C[C@@H](C#N)C2=NN(c3c(F)cccc3F)[C]N21)(C(C)C)C(C)C
1649	CC(C)[Si](OC[C@@H]1C[C@@H](C#N)C2=NN(c3cc(C(C)(C)C)cc(C(C)(C)C)c3)[C]N21)(C(C)C)C(C)C
1650	CC(C)[Si](OC[C@@H]1C[C@@H](C#N)C2=NN(c3cc(C(F)(F)F)cc(C(F)(F)F)c3)[C]N21)(C(C)C)C(C)C
1652	CC(C)[Si](OC[C@@H]1C[C@@H](C#N)C2=NN(c3cc(F)c(F)c(F)c3)[C]N21)(C(C)C)C(C)C
1653	CC(C)[Si](OC[C@@H]1C[C@@H](C#N)C2=NN(c3cc(F)cc(F)c3)[C]N21)(C(C)C)C(C)C
1654	CC(C)[Si](OC[C@@H]1C[C@@H](C#N)C2=NN(c3cc([N+](=O)[O-])cc([N+](=O)[O-])c3)[C]N21)(C(C)C)C(C)C
1655	CC(C)[Si](OC[C@@H]1C[C@@H](C#N)C2=NN(c3ccc(Br)cc3)[C]N21)(C(C)C)C(C)C
1656	CC(C)[Si](OC[C@@H]1C[C@@H](C#N)C2=NN(c3ccc(C#N)cc3)[C]N21)(C(C)C)C(C)C
1658	CC(C)[Si](OC[C@@H]1C[C@@H](C#N)C2=NN(c3ccc(C(F)(F)F)cc3)[C]N21)(C(C)C)C(C)C
1659	CC(C)[Si](OC[C@@H]1C[C@@H](C#N)C2=NN(c3ccc(Cl)cc3)[C]N21)(C(C)C)C(C)C
1660	CC(C)[Si](OC[C@@H]1C[C@@H](C#N)C2=NN(c3ccc(F)cc3)[C]N21)(C(C)C)C(C)C
1661	CC(C)[Si](OC[C@@H]1C[C@@H](C#N)C2=NN(c3ccc(O)cc3)[C]N21)(C(C)C)C(C)C
1662	CC(C)[Si](OC[C@@H]1C[C@@H](C#N)C2=NN(c3ccc([N+](=O)[O-])cc3)[C]N21)(C(C)C)C(C)C
1663	CC(C)[Si](OC[C@@H]1C[C@@H](C#N)C2=NN(c3ccccc3)[C]N21)(C(C)C)C(C)C
1664	CC(C)[Si](OC[C@@H]1C[C@@H](C(F)(F)F)C2=NN(C)[C]N21)(C(C)C)C(C)C
1665	CC(C)[Si](OC[C@@H]1C[C@@H](C(F)(F)F)C2=NN(C3CCCCC3)[C]N21)(C(C)C)C(C)C
1666	CC(C)[Si](OC[C@@H]1C[C@@H](C(F)(F)F)C2=NN(Cc3ccccc3)[C]N21)(C(C)C)C(C)C
1667	CC(C)[Si](OC[C@@H]1C[C@@H](C(F)(F)F)C2=NN(Cc3ccccn3)[C]N21)(C(C)C)C(C)C
1668	CC(C)[Si](OC[C@@H]1C[C@@H](C(F)(F)F)C2=NN([C@H](C)C3CCCCC3)[C]N21)(C(C)C)C(C)C
1669	CC(C)[Si](OC[C@@H]1C[C@@H](C(F)(F)F)C2=NN([C@H](C)c3cccc4ccccc34)[C]N21)(C(C)C)C(C)C
1670	CC(C)[Si](OC[C@@H]1C[C@@H](C(F)(F)F)C2=NN([C@H](C)c3ccccc3)[C]N21)(C(C)C)C(C)C
1671	CC(C)[Si](OC[C@@H]1C[C@@H](C(F)(F)F)C2=NN(c3c(Cl)cc(Cl)cc3Cl)[C]N21)(C(C)C)C(C)C
1672	CC(C)[Si](OC[C@@H]1C[C@@H](C(F)(F)F)C2=NN(c3c(F)c(F)c(F)c(F)c3F)[C]N21)(C(C)C)C(C)C
1673	CC(C)[Si](OC[C@@H]1C[C@@H](C(F)(F)F)C2=NN(c3c(F)cccc3F)[C]N21)(C(C)C)C(C)C
1674	CC(C)[Si](OC[C@@H]1C[C@@H](C(F)(F)F)C2=NN(c3cc(C(C)(C)C)cc(C(C)(C)C)c3)[C]N21)(C(C)C)C(C)C
1675	CC(C)[Si](OC[C@@H]1C[C@@H](C(F)(F)F)C2=NN(c3cc(C(F)(F)F)cc(C(F)(F)F)c3)[C]N21)(C(C)C)C(C)C
1676	CC(C)[Si](OC[C@@H]1C[C@@H](C(F)(F)F)C2=NN(c3cc(Cl)cc(Cl)c3)[C]N21)(C(C)C)C(C)C
1677	CC(C)[Si](OC[C@@H]1C[C@@H](C(F)(F)F)C2=NN(c3cc(F)c(F)c(F)c3)[C]N21)(C(C)C)C(C)C
1678	CC(C)[Si](OC[C@@H]1C[C@@H](C(F)(F)F)C2=NN(c3cc(F)cc(F)c3)[C]N21)(C(C)C)C(C)C
1679	CC(C)[Si](OC[C@@H]1C[C@@H](C(F)(F)F)C2=NN(c3cc([N+](=O)[O-])cc([N+](=O)[O-])c3)[C]N21)(C(C)C)C(C)C
1680	CC(C)[Si](OC[C@@H]1C[C@@H](C(F)(F)F)C2=NN(c3ccc(Br)cc3)[C]N21)(C(C)C)C(C)C
1681	CC(C)[Si](OC[C@@H]1C[C@@H](C(F)(F)F)C2=NN(c3ccc(C#N)cc3)[C]N21)(C(C)C)C(C)C
1682	CC(C)[Si](OC[C@@H]1C[C@@H](C(F)(F)F)C2=NN(c3ccc(C(C)(C)C)cc3)[C]N21)(C(C)C)C(C)C
1683	CC(C)[Si](OC[C@@H]1C[C@@H](C(F)(F)F)C2=NN(c3ccc(C(F)(F)F)cc3)[C]N21)(C(C)C)C(C)C
1684	CC(C)[Si](OC[C@@H]1C[C@@H](C(F)(F)F)C2=NN(c3ccc(Cl)cc3)[C]N21)(C(C)C)C(C)C
1685	CC(C)[Si](OC[C@@H]1C[C@@H](C(F)(F)F)C2=NN(c3ccc(F)cc3)[C]N21)(C(C)C)C(C)C
1686	CC(C)[Si](OC[C@@H]1C[C@@H](C(F)(F)F)C2=NN(c3ccc(O)cc3)[C]N21)(C(C)C)C(C)C
1687	CC(C)[Si](OC[C@@H]1C[C@@H](C(F)(F)F)C2=NN(c3ccc([N+](=O)[O-])cc3)[C]N21)(C(C)C)C(C)C
1688	CC(C)[Si](OC[C@@H]1C[C@@H](C(F)(F)F)C2=NN(c3ccccc3)[C]N21)(C(C)C)C(C)C
1689	CC(C)[Si](OC[C@@H]1C[C@@H](C)C2=NN(C)[C]N21)(C(C)C)C(C)C
1690	CC(C)[Si](OC[C@@H]1C[C@@H](C)C2=NN(C3CCCCC3)[C]N21)(C(C)C)C(C)C
1691	CC(C)[Si](OC[C@@H]1C[C@@H](C)C2=NN(Cc3ccccc3)[C]N21)(C(C)C)C(C)C
1692	CC(C)[Si](OC[C@@H]1C[C@@H](C)C2=NN(Cc3ccccn3)[C]N21)(C(C)C)C(C)C
1693	CC(C)[Si](OC[C@@H]1C[C@@H](C)C2=NN([C@H](C)C3CCCCC3)[C]N21)(C(C)C)C(C)C
1694	CC(C)[Si](OC[C@@H]1C[C@@H](C)C2=NN([C@H](C)c3cccc4ccccc34)[C]N21)(C(C)C)C(C)C
1695	CC(C)[Si](OC[C@@H]1C[C@@H](C)C2=NN([C@H](C)c3ccccc3)[C]N21)(C(C)C)C(C)C
1696	CC(C)[Si](OC[C@@H]1C[C@@H](C)C2=NN(c3c(Cl)cc(Cl)cc3Cl)[C]N21)(C(C)C)C(C)C
1697	CC(C)[Si](OC[C@@H]1C[C@@H](C)C2=NN(c3c(F)c(F)c(F)c(F)c3F)[C]N21)(C(C)C)C(C)C
1698	CC(C)[Si](OC[C@@H]1C[C@@H](C)C2=NN(c3c(F)cccc3F)[C]N21)(C(C)C)C(C)C
1699	CC(C)[Si](OC[C@@H]1C[C@@H](C)C2=NN(c3cc(C(C)(C)C)cc(C(C)(C)C)c3)[C]N21)(C(C)C)C(C)C
1700	CC(C)[Si](OC[C@@H]1C[C@@H](C)C2=NN(c3cc(C(F)(F)F)cc(C(F)(F)F)c3)[C]N21)(C(C)C)C(C)C
1701	CC(C)[Si](OC[C@@H]1C[C@@H](C)C2=NN(c3cc(Cl)cc(Cl)c3)[C]N21)(C(C)C)C(C)C
1702	CC(C)[Si](OC[C@@H]1C[C@@H](C)C2=NN(c3cc(F)c(F)c(F)c3)[C]N21)(C(C)C)C(C)C
1703	CC(C)[Si](OC[C@@H]1C[C@@H](C)C2=NN(c3cc(F)cc(F)c3)[C]N21)(C(C)C)C(C)C
1704	CC(C)[Si](OC[C@@H]1C[C@@H](C)C2=NN(c3cc([N+](=O)[O-])cc([N+](=O)[O-])c3)[C]N21)(C(C)C)C(C)C
1705	CC(C)[Si](OC[C@@H]1C[C@@H](C)C2=NN(c3ccc(Br)cc3)[C]N21)(C(C)C)C(C)C
1706	CC(C)[Si](OC[C@@H]1C[C@@H](C)C2=NN(c3ccc(C#N)cc3)[C]N21)(C(C)C)C(C)C
1707	CC(C)[Si](OC[C@@H]1C[C@@H](C)C2=NN(c3ccc(C(C)(C)C)cc3)[C]N21)(C(C)C)C(C)C
1708	CC(C)[Si](OC[C@@H]1C[C@@H](C)C2=NN(c3ccc(C(F)(F)F)cc3)[C]N21)(C(C)C)C(C)C
1709	CC(C)[Si](OC[C@@H]1C[C@@H](C)C2=NN(c3ccc(Cl)cc3)[C]N21)(C(C)C)C(C)C
1710	CC(C)[Si](OC[C@@H]1C[C@@H](C)C2=NN(c3ccc(F)cc3)[C]N21)(C(C)C)C(C)C
1711	CC(C)[Si](OC[C@@H]1C[C@@H](C)C2=NN(c3ccc(O)cc3)[C]N21)(C(C)C)C(C)C
1712	CC(C)[Si](OC[C@@H]1C[C@@H](C)C2=NN(c3ccc([N+](=O)[O-])cc3)[C]N21)(C(C)C)C(C)C
1713	CC(C)[Si](OC[C@@H]1C[C@@H](C)C2=NN(c3ccccc3)[C]N21)(C(C)C)C(C)C
1714	CC(C)[Si](OC[C@@H]1C[C@@H](CCO)C2=NN(C)[C]N21)(C(C)C)C(C)C
1715	CC(C)[Si](OC[C@@H]1C[C@@H](CCO)C2=NN(C3CCCCC3)[C]N21)(C(C)C)C(C)C
1716	CC(C)[Si](OC[C@@H]1C[C@@H](CCO)C2=NN(Cc3ccccc3)[C]N21)(C(C)C)C(C)C
1717	CC(C)[Si](OC[C@@H]1C[C@@H](CCO)C2=NN(Cc3ccccn3)[C]N21)(C(C)C)C(C)C
1718	CC(C)[Si](OC[C@@H]1C[C@@H](CCO)C2=NN([C@H](C)C3CCCCC3)[C]N21)(C(C)C)C(C)C
1719	CC(C)[Si](OC[C@@H]1C[C@@H](CCO)C2=NN([C@H](C)c3cccc4ccccc34)[C]N21)(C(C)C)C(C)C
1720	CC(C)[Si](OC[C@@H]1C[C@@H](CCO)C2=NN([C@H](C)c3ccccc3)[C]N21)(C(C)C)C(C)C
1721	CC(C)[Si](OC[C@@H]1C[C@@H](CCO)C2=NN(c3c(Cl)cc(Cl)cc3Cl)[C]N21)(C(C)C)C(C)C
1722	CC(C)[Si](OC[C@@H]1C[C@@H](CCO)C2=NN(c3c(F)c(F)c(F)c(F)c3F)[C]N21)(C(C)C)C(C)C
1723	CC(C)[Si](OC[C@@H]1C[C@@H](CCO)C2=NN(c3c(F)cccc3F)[C]N21)(C(C)C)C(C)C
1724	CC(C)[Si](OC[C@@H]1C[C@@H](CCO)C2=NN(c3cc(C(C)(C)C)cc(C(C)(C)C)c3)[C]N21)(C(C)C)C(C)C
1725	CC(C)[Si](OC[C@@H]1C[C@@H](CCO)C2=NN(c3cc(C(F)(F)F)cc(C(F)(F)F)c3)[C]N21)(C(C)C)C(C)C
1726	CC(C)[Si](OC[C@@H]1C[C@@H](CCO)C2=NN(c3cc(Cl)cc(Cl)c3)[C]N21)(C(C)C)C(C)C
1727	CC(C)[Si](OC[C@@H]1C[C@@H](CCO)C2=NN(c3cc(F)c(F)c(F)c3)[C]N21)(C(C)C)C(C)C
1728	CC(C)[Si](OC[C@@H]1C[C@@H](CCO)C2=NN(c3cc(F)cc(F)c3)[C]N21)(C(C)C)C(C)C
1729	CC(C)[Si](OC[C@@H]1C[C@@H](CCO)C2=NN(c3cc([N+](=O)[O-])cc([N+](=O)[O-])c3)[C]N21)(C(C)C)C(C)C
1730	CC(C)[Si](OC[C@@H]1C[C@@H](CCO)C2=NN(c3ccc(Br)cc3)[C]N21)(C(C)C)C(C)C
1731	CC(C)[Si](OC[C@@H]1C[C@@H](CCO)C2=NN(c3ccc(C#N)cc3)[C]N21)(C(C)C)C(C)C
1732	CC(C)[Si](OC[C@@H]1C[C@@H](CCO)C2=NN(c3ccc(C(C)(C)C)cc3)[C]N21)(C(C)C)C(C)C
1733	CC(C)[Si](OC[C@@H]1C[C@@H](CCO)C2=NN(c3ccc(C(F)(F)F)cc3)[C]N21)(C(C)C)C(C)C
1734	CC(C)[Si](OC[C@@H]1C[C@@H](CCO)C2=NN(c3ccc(Cl)cc3)[C]N21)(C(C)C)C(C)C
1735	CC(C)[Si](OC[C@@H]1C[C@@H](CCO)C2=NN(c3ccc(F)cc3)[C]N21)(C(C)C)C(C)C
1736	CC(C)[Si](OC[C@@H]1C[C@@H](CCO)C2=NN(c3ccc(O)cc3)[C]N21)(C(C)C)C(C)C
1737	CC(C)[Si](OC[C@@H]1C[C@@H](CCO)C2=NN(c3ccc([N+](=O)[O-])cc3)[C]N21)(C(C)C)C(C)C
1738	CC(C)[Si](OC[C@@H]1C[C@@H](CCO)C2=NN(c3ccccc3)[C]N21)(C(C)C)C(C)C
1739	CC(C)[Si](OC[C@@H]1C[C@@H](Cc2ccccc2)C2=NN(C)[C]N21)(C(C)C)C(C)C
1740	CC(C)[Si](OC[C@@H]1C[C@@H](Cc2ccccc2)C2=NN(C3CCCCC3)[C]N21)(C(C)C)C(C)C
1741	CC(C)[Si](OC[C@@H]1C[C@@H](Cc2ccccc2)C2=NN(Cc3ccccc3)[C]N21)(C(C)C)C(C)C
1742	CC(C)[Si](OC[C@@H]1C[C@@H](Cc2ccccc2)C2=NN(Cc3ccccn3)[C]N21)(C(C)C)C(C)C
1743	CC(C)[Si](OC[C@@H]1C[C@@H](Cc2ccccc2)C2=NN([C@H](C)C3CCCCC3)[C]N21)(C(C)C)C(C)C
1744	CC(C)[Si](OC[C@@H]1C[C@@H](Cc2ccccc2)C2=NN([C@H](C)c3cccc4ccccc34)[C]N21)(C(C)C)C(C)C
1745	CC(C)[Si](OC[C@@H]1C[C@@H](Cc2ccccc2)C2=NN([C@H](C)c3ccccc3)[C]N21)(C(C)C)C(C)C
1746	CC(C)[Si](OC[C@@H]1C[C@@H](Cc2ccccc2)C2=NN(c3c(Cl)cc(Cl)cc3Cl)[C]N21)(C(C)C)C(C)C
1747	CC(C)[Si](OC[C@@H]1C[C@@H](Cc2ccccc2)C2=NN(c3c(F)c(F)c(F)c(F)c3F)[C]N21)(C(C)C)C(C)C
1748	CC(C)[Si](OC[C@@H]1C[C@@H](Cc2ccccc2)C2=NN(c3c(F)cccc3F)[C]N21)(C(C)C)C(C)C
1749	CC(C)[Si](OC[C@@H]1C[C@@H](Cc2ccccc2)C2=NN(c3cc(C(C)(C)C)cc(C(C)(C)C)c3)[C]N21)(C(C)C)C(C)C
1750	CC(C)[Si](OC[C@@H]1C[C@@H](Cc2ccccc2)C2=NN(c3cc(C(F)(F)F)cc(C(F)(F)F)c3)[C]N21)(C(C)C)C(C)C
1751	CC(C)[Si](OC[C@@H]1C[C@@H](Cc2ccccc2)C2=NN(c3cc(Cl)cc(Cl)c3)[C]N21)(C(C)C)C(C)C
1752	CC(C)[Si](OC[C@@H]1C[C@@H](Cc2ccccc2)C2=NN(c3cc(F)c(F)c(F)c3)[C]N21)(C(C)C)C(C)C
1753	CC(C)[Si](OC[C@@H]1C[C@@H](Cc2ccccc2)C2=NN(c3cc(F)cc(F)c3)[C]N21)(C(C)C)C(C)C
1754	CC(C)[Si](OC[C@@H]1C[C@@H](Cc2ccccc2)C2=NN(c3cc([N+](=O)[O-])cc([N+](=O)[O-])c3)[C]N21)(C(C)C)C(C)C
1755	CC(C)[Si](OC[C@@H]1C[C@@H](Cc2ccccc2)C2=NN(c3ccc(Br)cc3)[C]N21)(C(C)C)C(C)C
1756	CC(C)[Si](OC[C@@H]1C[C@@H](Cc2ccccc2)C2=NN(c3ccc(C#N)cc3)[C]N21)(C(C)C)C(C)C
1757	CC(C)[Si](OC[C@@H]1C[C@@H](Cc2ccccc2)C2=NN(c3ccc(C(C)(C)C)cc3)[C]N21)(C(C)C)C(C)C
1758	CC(C)[Si](OC[C@@H]1C[C@@H](Cc2ccccc2)C2=NN(c3ccc(C(F)(F)F)cc3)[C]N21)(C(C)C)C(C)C
1759	CC(C)[Si](OC[C@@H]1C[C@@H](Cc2ccccc2)C2=NN(c3ccc(Cl)cc3)[C]N21)(C(C)C)C(C)C
1760	CC(C)[Si](OC[C@@H]1C[C@@H](Cc2ccccc2)C2=NN(c3ccc(F)cc3)[C]N21)(C(C)C)C(C)C
1761	CC(C)[Si](OC[C@@H]1C[C@@H](Cc2ccccc2)C2=NN(c3ccc(O)cc3)[C]N21)(C(C)C)C(C)C
1762	CC(C)[Si](OC[C@@H]1C[C@@H](Cc2ccccc2)C2=NN(c3ccc([N+](=O)[O-])cc3)[C]N21)(C(C)C)C(C)C
1763	CC(C)[Si](OC[C@@H]1C[C@@H](Cc2ccccc2)C2=NN(c3ccccc3)[C]N21)(C(C)C)C(C)C
1764	CC(C)[Si](OC[C@@H]1C[C@@H](Cl)C2=NN(C)[C]N21)(C(C)C)C(C)C
1765	CC(C)[Si](OC[C@@H]1C[C@@H](Cl)C2=NN(C3CCCCC3)[C]N21)(C(C)C)C(C)C
1766	CC(C)[Si](OC[C@@H]1C[C@@H](Cl)C2=NN(Cc3ccccc3)[C]N21)(C(C)C)C(C)C
1767	CC(C)[Si](OC[C@@H]1C[C@@H](Cl)C2=NN(Cc3ccccn3)[C]N21)(C(C)C)C(C)C
1768	CC(C)[Si](OC[C@@H]1C[C@@H](Cl)C2=NN([C@H](C)C3CCCCC3)[C]N21)(C(C)C)C(C)C
1769	CC(C)[Si](OC[C@@H]1C[C@@H](Cl)C2=NN([C@H](C)c3cccc4ccccc34)[C]N21)(C(C)C)C(C)C
1770	CC(C)[Si](OC[C@@H]1C[C@@H](Cl)C2=NN([C@H](C)c3ccccc3)[C]N21)(C(C)C)C(C)C
1771	CC(C)[Si](OC[C@@H]1C[C@@H](Cl)C2=NN(c3c(Cl)cc(Cl)cc3Cl)[C]N21)(C(C)C)C(C)C
1772	CC(C)[Si](OC[C@@H]1C[C@@H](Cl)C2=NN(c3c(F)c(F)c(F)c(F)c3F)[C]N21)(C(C)C)C(C)C
1773	CC(C)[Si](OC[C@@H]1C[C@@H](Cl)C2=NN(c3c(F)cccc3F)[C]N21)(C(C)C)C(C)C
1774	CC(C)[Si](OC[C@@H]1C[C@@H](Cl)C2=NN(c3cc(C(C)(C)C)cc(C(C)(C)C)c3)[C]N21)(C(C)C)C(C)C
1775	CC(C)[Si](OC[C@@H]1C[C@@H](Cl)C2=NN(c3cc(C(F)(F)F)cc(C(F)(F)F)c3)[C]N21)(C(C)C)C(C)C
1776	CC(C)[Si](OC[C@@H]1C[C@@H](Cl)C2=NN(c3cc(Cl)cc(Cl)c3)[C]N21)(C(C)C)C(C)C
1777	CC(C)[Si](OC[C@@H]1C[C@@H](Cl)C2=NN(c3cc(F)c(F)c(F)c3)[C]N21)(C(C)C)C(C)C
1778	CC(C)[Si](OC[C@@H]1C[C@@H](Cl)C2=NN(c3cc(F)cc(F)c3)[C]N21)(C(C)C)C(C)C
1779	CC(C)[Si](OC[C@@H]1C[C@@H](Cl)C2=NN(c3cc([N+](=O)[O-])cc([N+](=O)[O-])c3)[C]N21)(C(C)C)C(C)C
1780	CC(C)[Si](OC[C@@H]1C[C@@H](Cl)C2=NN(c3ccc(Br)cc3)[C]N21)(C(C)C)C(C)C
1781	CC(C)[Si](OC[C@@H]1C[C@@H](Cl)C2=NN(c3ccc(C#N)cc3)[C]N21)(C(C)C)C(C)C
1782	CC(C)[Si](OC[C@@H]1C[C@@H](Cl)C2=NN(c3ccc(C(C)(C)C)cc3)[C]N21)(C(C)C)C(C)C
1783	CC(C)[Si](OC[C@@H]1C[C@@H](Cl)C2=NN(c3ccc(C(F)(F)F)cc3)[C]N21)(C(C)C)C(C)C
1784	CC(C)[Si](OC[C@@H]1C[C@@H](Cl)C2=NN(c3ccc(Cl)cc3)[C]N21)(C(C)C)C(C)C
1785	CC(C)[Si](OC[C@@H]1C[C@@H](Cl)C2=NN(c3ccc(F)cc3)[C]N21)(C(C)C)C(C)C
1786	CC(C)[Si](OC[C@@H]1C[C@@H](Cl)C2=NN(c3ccc(O)cc3)[C]N21)(C(C)C)C(C)C
1787	CC(C)[Si](OC[C@@H]1C[C@@H](Cl)C2=NN(c3ccc([N+](=O)[O-])cc3)[C]N21)(C(C)C)C(C)C
1788	CC(C)[Si](OC[C@@H]1C[C@@H](Cl)C2=NN(c3ccccc3)[C]N21)(C(C)C)C(C)C
1789	CC(C)[Si](OC[C@@H]1C[C@@H](F)C2=NN(C)[C]N21)(C(C)C)C(C)C
1790	CC(C)[Si](OC[C@@H]1C[C@@H](F)C2=NN(C3CCCCC3)[C]N21)(C(C)C)C(C)C
1791	CC(C)[Si](OC[C@@H]1C[C@@H](F)C2=NN(Cc3ccccc3)[C]N21)(C(C)C)C(C)C
1792	CC(C)[Si](OC[C@@H]1C[C@@H](F)C2=NN(Cc3ccccn3)[C]N21)(C(C)C)C(C)C
1793	CC(C)[Si](OC[C@@H]1C[C@@H](F)C2=NN([C@H](C)C3CCCCC3)[C]N21)(C(C)C)C(C)C
1794	CC(C)[Si](OC[C@@H]1C[C@@H](F)C2=NN([C@H](C)c3cccc4ccccc34)[C]N21)(C(C)C)C(C)C
1795	CC(C)[Si](OC[C@@H]1C[C@@H](F)C2=NN([C@H](C)c3ccccc3)[C]N21)(C(C)C)C(C)C
1796	CC(C)[Si](OC[C@@H]1C[C@@H](F)C2=NN(c3c(Cl)cc(Cl)cc3Cl)[C]N21)(C(C)C)C(C)C
1797	CC(C)[Si](OC[C@@H]1C[C@@H](F)C2=NN(c3c(F)c(F)c(F)c(F)c3F)[C]N21)(C(C)C)C(C)C
1798	CC(C)[Si](OC[C@@H]1C[C@@H](F)C2=NN(c3c(F)cccc3F)[C]N21)(C(C)C)C(C)C
1799	CC(C)[Si](OC[C@@H]1C[C@@H](F)C2=NN(c3cc(C(C)(C)C)cc(C(C)(C)C)c3)[C]N21)(C(C)C)C(C)C
1800	CC(C)[Si](OC[C@@H]1C[C@@H](F)C2=NN(c3cc(C(F)(F)F)cc(C(F)(F)F)c3)[C]N21)(C(C)C)C(C)C
1801	CC(C)[Si](OC[C@@H]1C[C@@H](F)C2=NN(c3cc(Cl)cc(Cl)c3)[C]N21)(C(C)C)C(C)C
1802	CC(C)[Si](OC[C@@H]1C[C@@H](F)C2=NN(c3cc(F)c(F)c(F)c3)[C]N21)(C(C)C)C(C)C
1803	CC(C)[Si](OC[C@@H]1C[C@@H](F)C2=NN(c3cc(F)cc(F)c3)[C]N21)(C(C)C)C(C)C
1804	CC(C)[Si](OC[C@@H]1C[C@@H](F)C2=NN(c3cc([N+](=O)[O-])cc([N+](=O)[O-])c3)[C]N21)(C(C)C)C(C)C
1805	CC(C)[Si](OC[C@@H]1C[C@@H](F)C2=NN(c3ccc(Br)cc3)[C]N21)(C(C)C)C(C)C
1806	CC(C)[Si](OC[C@@H]1C[C@@H](F)C2=NN(c3ccc(C#N)cc3)[C]N21)(C(C)C)C(C)C
1807	CC(C)[Si](OC[C@@H]1C[C@@H](F)C2=NN(c3ccc(C(C)(C)C)cc3)[C]N21)(C(C)C)C(C)C
1808	CC(C)[Si](OC[C@@H]1C[C@@H](F)C2=NN(c3ccc(C(F)(F)F)cc3)[C]N21)(C(C)C)C(C)C
1809	CC(C)[Si](OC[C@@H]1C[C@@H](F)C2=NN(c3ccc(Cl)cc3)[C]N21)(C(C)C)C(C)C
1810	CC(C)[Si](OC[C@@H]1C[C@@H](F)C2=NN(c3ccc(F)cc3)[C]N21)(C(C)C)C(C)C
1811	CC(C)[Si](OC[C@@H]1C[C@@H](F)C2=NN(c3ccc(O)cc3)[C]N21)(C(C)C)C(C)C
1812	CC(C)[Si](OC[C@@H]1C[C@@H](F)C2=NN(c3ccc([N+](=O)[O-])cc3)[C]N21)(C(C)C)C(C)C
1813	CC(C)[Si](OC[C@@H]1C[C@@H](F)C2=NN(c3ccccc3)[C]N21)(C(C)C)C(C)C
1814	CC(C)[Si](OC[C@@H]1C[C@@H](c2ccccc2)C2=NN(C)[C]N21)(C(C)C)C(C)C
1815	CC(C)[Si](OC[C@@H]1C[C@@H](c2ccccc2)C2=NN(C3CCCCC3)[C]N21)(C(C)C)C(C)C
1816	CC(C)[Si](OC[C@@H]1C[C@@H](c2ccccc2)C2=NN(Cc3ccccc3)[C]N21)(C(C)C)C(C)C
1817	CC(C)[Si](OC[C@@H]1C[C@@H](c2ccccc2)C2=NN(Cc3ccccn3)[C]N21)(C(C)C)C(C)C
1818	CC(C)[Si](OC[C@@H]1C[C@@H](c2ccccc2)C2=NN([C@H](C)C3CCCCC3)[C]N21)(C(C)C)C(C)C
1819	CC(C)[Si](OC[C@@H]1C[C@@H](c2ccccc2)C2=NN([C@H](C)c3cccc4ccccc34)[C]N21)(C(C)C)C(C)C
1820	CC(C)[Si](OC[C@@H]1C[C@@H](c2ccccc2)C2=NN([C@H](C)c3ccccc3)[C]N21)(C(C)C)C(C)C
1821	CC(C)[Si](OC[C@@H]1C[C@@H](c2ccccc2)C2=NN(c3c(Cl)cc(Cl)cc3Cl)[C]N21)(C(C)C)C(C)C
1822	CC(C)[Si](OC[C@@H]1C[C@@H](c2ccccc2)C2=NN(c3c(F)c(F)c(F)c(F)c3F)[C]N21)(C(C)C)C(C)C
1823	CC(C)[Si](OC[C@@H]1C[C@@H](c2ccccc2)C2=NN(c3c(F)cccc3F)[C]N21)(C(C)C)C(C)C
1824	CC(C)[Si](OC[C@@H]1C[C@@H](c2ccccc2)C2=NN(c3cc(C(C)(C)C)cc(C(C)(C)C)c3)[C]N21)(C(C)C)C(C)C
1825	CC(C)[Si](OC[C@@H]1C[C@@H](c2ccccc2)C2=NN(c3cc(C(F)(F)F)cc(C(F)(F)F)c3)[C]N21)(C(C)C)C(C)C
1826	CC(C)[Si](OC[C@@H]1C[C@@H](c2ccccc2)C2=NN(c3cc(Cl)cc(Cl)c3)[C]N21)(C(C)C)C(C)C
1827	CC(C)[Si](OC[C@@H]1C[C@@H](c2ccccc2)C2=NN(c3cc(F)c(F)c(F)c3)[C]N21)(C(C)C)C(C)C
1828	CC(C)[Si](OC[C@@H]1C[C@@H](c2ccccc2)C2=NN(c3cc(F)cc(F)c3)[C]N21)(C(C)C)C(C)C
1829	CC(C)[Si](OC[C@@H]1C[C@@H](c2ccccc2)C2=NN(c3cc([N+](=O)[O-])cc([N+](=O)[O-])c3)[C]N21)(C(C)C)C(C)C
1830	CC(C)[Si](OC[C@@H]1C[C@@H](c2ccccc2)C2=NN(c3ccc(Br)cc3)[C]N21)(C(C)C)C(C)C
1832	CC(C)[Si](OC[C@@H]1C[C@@H](c2ccccc2)C2=NN(c3ccc(C(C)(C)C)cc3)[C]N21)(C(C)C)C(C)C
1833	CC(C)[Si](OC[C@@H]1C[C@@H](c2ccccc2)C2=NN(c3ccc(C(F)(F)F)cc3)[C]N21)(C(C)C)C(C)C
1834	CC(C)[Si](OC[C@@H]1C[C@@H](c2ccccc2)C2=NN(c3ccc(Cl)cc3)[C]N21)(C(C)C)C(C)C
1835	CC(C)[Si](OC[C@@H]1C[C@@H](c2ccccc2)C2=NN(c3ccc(F)cc3)[C]N21)(C(C)C)C(C)C
1836	CC(C)[Si](OC[C@@H]1C[C@@H](c2ccccc2)C2=NN(c3ccc(O)cc3)[C]N21)(C(C)C)C(C)C
1837	CC(C)[Si](OC[C@@H]1C[C@@H](c2ccccc2)C2=NN(c3ccc([N+](=O)[O-])cc3)[C]N21)(C(C)C)C(C)C
1838	CC(C)[Si](OC[C@@H]1C[C@@H](c2ccccc2)C2=NN(c3ccccc3)[C]N21)(C(C)C)C(C)C
1839	CC(C)[Si](OC[C@H]1CCC2=CS[C]N21)(C(C)C)C(C)C
1840	CC(C)[Si](OC[C@H]1COC2=NN(C)[C]N21)(C(C)C)C(C)C
1841	CC(C)[Si](OC[C@H]1COC2=NN(C3CCCCC3)[C]N21)(C(C)C)C(C)C
1842	CC(C)[Si](OC[C@H]1COC2=NN(Cc3ccccc3)[C]N21)(C(C)C)C(C)C
1843	CC(C)[Si](OC[C@H]1COC2=NN(Cc3ccccn3)[C]N21)(C(C)C)C(C)C
1844	CC(C)[Si](OC[C@H]1COC2=NN([C@H](C)C3CCCCC3)[C]N21)(C(C)C)C(C)C
1845	CC(C)[Si](OC[C@H]1COC2=NN([C@H](C)c3cccc4ccccc34)[C]N21)(C(C)C)C(C)C
1846	CC(C)[Si](OC[C@H]1COC2=NN([C@H](C)c3ccccc3)[C]N21)(C(C)C)C(C)C
1847	CC(C)[Si](OC[C@H]1COC2=NN(c3c(Cl)cc(Cl)cc3Cl)[C]N21)(C(C)C)C(C)C
1848	CC(C)[Si](OC[C@H]1COC2=NN(c3c(F)c(F)c(F)c(F)c3F)[C]N21)(C(C)C)C(C)C
1850	CC(C)[Si](OC[C@H]1COC2=NN(c3cc(C(C)(C)C)cc(C(C)(C)C)c3)[C]N21)(C(C)C)C(C)C
1851	CC(C)[Si](OC[C@H]1COC2=NN(c3cc(C(F)(F)F)cc(C(F)(F)F)c3)[C]N21)(C(C)C)C(C)C
1852	CC(C)[Si](OC[C@H]1COC2=NN(c3cc(Cl)cc(Cl)c3)[C]N21)(C(C)C)C(C)C
1853	CC(C)[Si](OC[C@H]1COC2=NN(c3cc(F)c(F)c(F)c3)[C]N21)(C(C)C)C(C)C
1854	CC(C)[Si](OC[C@H]1COC2=NN(c3cc(F)cc(F)c3)[C]N21)(C(C)C)C(C)C
1855	CC(C)[Si](OC[C@H]1COC2=NN(c3cc([N+](=O)[O-])cc([N+](=O)[O-])c3)[C]N21)(C(C)C)C(C)C
1856	CC(C)[Si](OC[C@H]1COC2=NN(c3ccc(Br)cc3)[C]N21)(C(C)C)C(C)C
1857	CC(C)[Si](OC[C@H]1COC2=NN(c3ccc(C#N)cc3)[C]N21)(C(C)C)C(C)C
1858	CC(C)[Si](OC[C@H]1COC2=NN(c3ccc(C(C)(C)C)cc3)[C]N21)(C(C)C)C(C)C
1859	CC(C)[Si](OC[C@H]1COC2=NN(c3ccc(C(F)(F)F)cc3)[C]N21)(C(C)C)C(C)C
1860	CC(C)[Si](OC[C@H]1COC2=NN(c3ccc(Cl)cc3)[C]N21)(C(C)C)C(C)C
1861	CC(C)[Si](OC[C@H]1COC2=NN(c3ccc(F)cc3)[C]N21)(C(C)C)C(C)C
1862	CC(C)[Si](OC[C@H]1COC2=NN(c3ccc(O)cc3)[C]N21)(C(C)C)C(C)C
1863	CC(C)[Si](OC[C@H]1COC2=NN(c3ccc([N+](=O)[O-])cc3)[C]N21)(C(C)C)C(C)C
1864	CC(C)[Si](OC[C@H]1COC2=NN(c3ccccc3)[C]N21)(C(C)C)C(C)C
1865	CC(C)[Si](OC[C@H]1COCC2=NN(C)[C]N21)(C(C)C)C(C)C
1866	CC(C)[Si](OC[C@H]1COCC2=NN(C3CCCCC3)[C]N21)(C(C)C)C(C)C
1867	CC(C)[Si](OC[C@H]1COCC2=NN(Cc3ccccc3)[C]N21)(C(C)C)C(C)C
1868	CC(C)[Si](OC[C@H]1COCC2=NN(Cc3ccccn3)[C]N21)(C(C)C)C(C)C
1869	CC(C)[Si](OC[C@H]1COCC2=NN([C@H](C)C3CCCCC3)[C]N21)(C(C)C)C(C)C
1870	CC(C)[Si](OC[C@H]1COCC2=NN([C@H](C)c3cccc4ccccc34)[C]N21)(C(C)C)C(C)C
1871	CC(C)[Si](OC[C@H]1COCC2=NN([C@H](C)c3ccccc3)[C]N21)(C(C)C)C(C)C
1872	CC(C)[Si](OC[C@H]1COCC2=NN(c3c(Cl)cc(Cl)cc3Cl)[C]N21)(C(C)C)C(C)C
1873	CC(C)[Si](OC[C@H]1COCC2=NN(c3c(F)c(F)c(F)c(F)c3F)[C]N21)(C(C)C)C(C)C
1874	CC(C)[Si](OC[C@H]1COCC2=NN(c3c(F)cccc3F)[C]N21)(C(C)C)C(C)C
1875	CC(C)[Si](OC[C@H]1COCC2=NN(c3cc(C(C)(C)C)cc(C(C)(C)C)c3)[C]N21)(C(C)C)C(C)C
1876	CC(C)[Si](OC[C@H]1COCC2=NN(c3cc(C(F)(F)F)cc(C(F)(F)F)c3)[C]N21)(C(C)C)C(C)C
1877	CC(C)[Si](OC[C@H]1COCC2=NN(c3cc(Cl)cc(Cl)c3)[C]N21)(C(C)C)C(C)C
1878	CC(C)[Si](OC[C@H]1COCC2=NN(c3cc(F)c(F)c(F)c3)[C]N21)(C(C)C)C(C)C
1879	CC(C)[Si](OC[C@H]1COCC2=NN(c3cc(F)cc(F)c3)[C]N21)(C(C)C)C(C)C
1880	CC(C)[Si](OC[C@H]1COCC2=NN(c3cc([N+](=O)[O-])cc([N+](=O)[O-])c3)[C]N21)(C(C)C)C(C)C
1881	CC(C)[Si](OC[C@H]1COCC2=NN(c3ccc(Br)cc3)[C]N21)(C(C)C)C(C)C
1882	CC(C)[Si](OC[C@H]1COCC2=NN(c3ccc(C#N)cc3)[C]N21)(C(C)C)C(C)C
1883	CC(C)[Si](OC[C@H]1COCC2=NN(c3ccc(C(C)(C)C)cc3)[C]N21)(C(C)C)C(C)C
1884	CC(C)[Si](OC[C@H]1COCC2=NN(c3ccc(C(F)(F)F)cc3)[C]N21)(C(C)C)C(C)C
1885	CC(C)[Si](OC[C@H]1COCC2=NN(c3ccc(Cl)cc3)[C]N21)(C(C)C)C(C)C
1886	CC(C)[Si](OC[C@H]1COCC2=NN(c3ccc(F)cc3)[C]N21)(C(C)C)C(C)C
1887	CC(C)[Si](OC[C@H]1COCC2=NN(c3ccc(O)cc3)[C]N21)(C(C)C)C(C)C
1888	CC(C)[Si](OC[C@H]1COCC2=NN(c3ccc([N+](=O)[O-])cc3)[C]N21)(C(C)C)C(C)C
1889	CC(C)[Si](OC[C@H]1COCC2=NN(c3ccccc3)[C]N21)(C(C)C)C(C)C
1890	CC(C)[Si](OC[C@H]1COCC2=NS[C]N21)(C(C)C)C(C)C
1891	CC(C)[Si](OC[C@H]1C[C@H](C#N)C2=CS[C]N21)(C(C)C)C(C)C
1892	CC(C)[Si](OC[C@H]1C[C@H](C(F)(F)F)C2=CS[C]N21)(C(C)C)C(C)C
1893	CC(C)[Si](OC[C@H]1C[C@H](C)C2=CS[C]N21)(C(C)C)C(C)C
1894	CC(C)[Si](OC[C@H]1C[C@H](CCO)C2=CS[C]N21)(C(C)C)C(C)C
1895	CC(C)[Si](OC[C@H]1C[C@H](Cc2ccccc2)C2=CS[C]N21)(C(C)C)C(C)C
1896	CC(C)[Si](OC[C@H]1C[C@H](Cl)C2=CS[C]N21)(C(C)C)C(C)C
1897	CC(C)[Si](OC[C@H]1C[C@H](F)C2=CS[C]N21)(C(C)C)C(C)C
1898	CC(C)[Si](OC[C@H]1C[C@H](c2ccccc2)C2=CS[C]N21)(C(C)C)C(C)C
1899	CC(C)c1cc(C(C)C)c(N2[C]N(c3c(C(C)C)cc(C(C)C)cc3C(C)C)C(C#N)=C2C#N)c(C(C)C)c1
1900	CC(C)c1cc(C(C)C)c(N2[C]N(c3c(C(C)C)cc(C(C)C)cc3C(C)C)C(C#N)=N2)c(C(C)C)c1
1901	CC(C)c1cc(C(C)C)c(N2[C]N(c3c(C(C)C)cc(C(C)C)cc3C(C)C)C(C(F)(F)F)=C2C(F)(F)F)c(C(C)C)c1
1902	CC(C)c1cc(C(C)C)c(N2[C]N(c3c(C(C)C)cc(C(C)C)cc3C(C)C)C(C(F)(F)F)=N2)c(C(C)C)c1
1903	CC(C)c1cc(C(C)C)c(N2[C]N(c3c(C(C)C)cc(C(C)C)cc3C(C)C)C(CCO)=C2CCO)c(C(C)C)c1
1904	CC(C)c1cc(C(C)C)c(N2[C]N(c3c(C(C)C)cc(C(C)C)cc3C(C)C)C(CCO)=N2)c(C(C)C)c1
1905	CC(C)c1cc(C(C)C)c(N2[C]N(c3c(C(C)C)cc(C(C)C)cc3C(C)C)C(Cc3ccccc3)=C2Cc2ccccc2)c(C(C)C)c1
1906	CC(C)c1cc(C(C)C)c(N2[C]N(c3c(C(C)C)cc(C(C)C)cc3C(C)C)C(Cc3ccccc3)=N2)c(C(C)C)c1
1907	CC(C)c1cc(C(C)C)c(N2[C]N(c3c(C(C)C)cc(C(C)C)cc3C(C)C)C(Cl)=C2Cl)c(C(C)C)c1
1908	CC(C)c1cc(C(C)C)c(N2[C]N(c3c(C(C)C)cc(C(C)C)cc3C(C)C)C(Cl)=N2)c(C(C)C)c1
1909	CC(C)c1cc(C(C)C)c(N2[C]N(c3c(C(C)C)cc(C(C)C)cc3C(C)C)C(F)=C2F)c(C(C)C)c1
1910	CC(C)c1cc(C(C)C)c(N2[C]N(c3c(C(C)C)cc(C(C)C)cc3C(C)C)C(F)=N2)c(C(C)C)c1
1911	CC(C)c1cc(C(C)C)c(N2[C]N(c3c(C(C)C)cc(C(C)C)cc3C(C)C)C(c3ccccc3)=C2c2ccccc2)c(C(C)C)c1
1912	CC(C)c1cc(C(C)C)c(N2[C]N(c3c(C(C)C)cc(C(C)C)cc3C(C)C)C(c3ccccc3)=N2)c(C(C)C)c1
1913	CC(C)c1cc(C(C)C)c(N2[C]N(c3c(C(C)C)cc(C(C)C)cc3C(C)C)C=C2)c(C(C)C)c1
1914	CC(C)c1cc(C(C)C)c(N2[C]N(c3c(C(C)C)cc(C(C)C)cc3C(C)C)CC2)c(C(C)C)c1
1915	CC(C)c1cc(C(C)C)c(N2[C]N(c3c(C(C)C)cc(C(C)C)cc3C(C)C)N=C2)c(C(C)C)c1
1916	CC(C)c1cc(C(C)C)c(N2[C]N(c3c(C(C)C)cc(C(C)C)cc3C(C)C)N=N2)c(C(C)C)c1
1917	CC(C)c1cc(C(C)C)c(N2[C]N(c3c(C(C)C)cc(C(C)C)cc3C(C)C)[C@@H](C#N)[C@@H]2C#N)c(C(C)C)c1
1918	CC(C)c1cc(C(C)C)c(N2[C]N(c3c(C(C)C)cc(C(C)C)cc3C(C)C)[C@@H](C(C)C)[C@@H]2C(C)C)c(C(C)C)c1
1919	CC(C)c1cc(C(C)C)c(N2[C]N(c3c(C(C)C)cc(C(C)C)cc3C(C)C)[C@@H](C(F)(F)F)[C@@H]2C(F)(F)F)c(C(C)C)c1
1920	CC(C)c1cc(C(C)C)c(N2[C]N(c3c(C(C)C)cc(C(C)C)cc3C(C)C)[C@@H](C)[C@@H]2C)c(C(C)C)c1
1921	CC(C)c1cc(C(C)C)c(N2[C]N(c3c(C(C)C)cc(C(C)C)cc3C(C)C)[C@@H](CCO)[C@@H]2CCO)c(C(C)C)c1
1922	CC(C)c1cc(C(C)C)c(N2[C]N(c3c(C(C)C)cc(C(C)C)cc3C(C)C)[C@@H](Cc3ccccc3)[C@@H]2Cc2ccccc2)c(C(C)C)c1
1923	CC(C)c1cc(C(C)C)c(N2[C]N(c3c(C(C)C)cc(C(C)C)cc3C(C)C)[C@@H](Cl)[C@@H]2Cl)c(C(C)C)c1
1924	CC(C)c1cc(C(C)C)c(N2[C]N(c3c(C(C)C)cc(C(C)C)cc3C(C)C)[C@@H](F)[C@@H]2F)c(C(C)C)c1
1925	CC(C)c1cc(C(C)C)c(N2[C]N(c3c(C(C)C)cc(C(C)C)cc3C(C)C)[C@@H](c3ccccc3)[C@@H]2c2ccccc2)c(C(C)C)c1
1926	CC(C)c1cc(C(C)C)c(N2[C]N(c3c(C(C)C)cc(C(C)C)cc3C(C)C)[C@@H]3CCCC[C@H]32)c(C(C)C)c1
1927	CC(C)c1cc(C(C)C)c(N2[C]N(c3c(C(C)C)cc(C(C)C)cc3C(C)C)c3ccccc32)c(C(C)C)c1
1928	CC(C)c1cc(C(C)C)c(N2[C]N3C(=C2)CO[C@H]2Cc4ccccc4[C@H]23)c(C(C)C)c1
1929	CC(C)c1cc(C(C)C)c(N2[C]N3C(=C2C#N)CO[C@H]2Cc4ccccc4[C@H]23)c(C(C)C)c1
1930	CC(C)c1cc(C(C)C)c(N2[C]N3C(=C2C(F)(F)F)CO[C@H]2Cc4ccccc4[C@H]23)c(C(C)C)c1
1931	CC(C)c1cc(C(C)C)c(N2[C]N3C(=C2CCO)CO[C@H]2Cc4ccccc4[C@H]23)c(C(C)C)c1
1932	CC(C)c1cc(C(C)C)c(N2[C]N3C(=C2Cc2ccccc2)CO[C@H]2Cc4ccccc4[C@H]23)c(C(C)C)c1
1933	CC(C)c1cc(C(C)C)c(N2[C]N3C(=C2Cl)CO[C@H]2Cc4ccccc4[C@H]23)c(C(C)C)c1
1934	CC(C)c1cc(C(C)C)c(N2[C]N3C(=C2F)CO[C@H]2Cc4ccccc4[C@H]23)c(C(C)C)c1
1935	CC(C)c1cc(C(C)C)c(N2[C]N3C(=C2c2ccccc2)CO[C@H]2Cc4ccccc4[C@H]23)c(C(C)C)c1
1936	CC(C)c1cc(C(C)C)c(N2[C]N3C(=N2)CC[C@H]3C(C)(C)C)c(C(C)C)c1
1937	CC(C)c1cc(C(C)C)c(N2[C]N3C(=N2)CC[C@H]3C(C)C)c(C(C)C)c1
1938	CC(C)c1cc(C(C)C)c(N2[C]N3C(=N2)CC[C@H]3C(F)(c2ccccc2)c2ccccc2)c(C(C)C)c1
1939	CC(C)c1cc(C(C)C)c(N2[C]N3C(=N2)CC[C@H]3C(O)(c2cc(C(F)(F)F)cc(C(F)(F)F)c2)c2cc(C(F)(F)F)cc(C(F)(F)F)c2)c(C(C)C)c1
1940	CC(C)c1cc(C(C)C)c(N2[C]N3C(=N2)CC[C@H]3C(O)(c2ccccc2)c2ccccc2)c(C(C)C)c1
1941	CC(C)c1cc(C(C)C)c(N2[C]N3C(=N2)CC[C@H]3C(O[Si](C)(C)C)(c2ccccc2)c2ccccc2)c(C(C)C)c1
1942	CC(C)c1cc(C(C)C)c(N2[C]N3C(=N2)CC[C@H]3C(c2ccccc2)c2ccccc2)c(C(C)C)c1
1943	CC(C)c1cc(C(C)C)c(N2[C]N3C(=N2)CC[C@H]3C)c(C(C)C)c1
1944	CC(C)c1cc(C(C)C)c(N2[C]N3C(=N2)CC[C@H]3C2CCCCC2)c(C(C)C)c1
1945	CC(C)c1cc(C(C)C)c(N2[C]N3C(=N2)CC[C@H]3CO[Si](C(C)C)(C(C)C)C(C)C)c(C(C)C)c1
1946	CC(C)c1cc(C(C)C)c(N2[C]N3C(=N2)CC[C@H]3COc2ccccc2)c(C(C)C)c1
1947	CC(C)c1cc(C(C)C)c(N2[C]N3C(=N2)CC[C@H]3Cc2ccccc2)c(C(C)C)c1
1948	CC(C)c1cc(C(C)C)c(N2[C]N3C(=N2)CC[C@H]3c2ccccc2)c(C(C)C)c1
1949	CC(C)c1cc(C(C)C)c(N2[C]N3C(=N2)COC[C@@H]3C(C)(C)C)c(C(C)C)c1
1950	CC(C)c1cc(C(C)C)c(N2[C]N3C(=N2)COC[C@@H]3C(C)C)c(C(C)C)c1
1951	CC(C)c1cc(C(C)C)c(N2[C]N3C(=N2)COC[C@@H]3C(F)(c2ccccc2)c2ccccc2)c(C(C)C)c1
1952	CC(C)c1cc(C(C)C)c(N2[C]N3C(=N2)COC[C@@H]3C(O)(c2cc(C(F)(F)F)cc(C(F)(F)F)c2)c2cc(C(F)(F)F)cc(C(F)(F)F)c2)c(C(C)C)c1
1953	CC(C)c1cc(C(C)C)c(N2[C]N3C(=N2)COC[C@@H]3C(O)(c2ccccc2)c2ccccc2)c(C(C)C)c1
1954	CC(C)c1cc(C(C)C)c(N2[C]N3C(=N2)COC[C@@H]3C(O[Si](C)(C)C)(c2ccccc2)c2ccccc2)c(C(C)C)c1
1955	CC(C)c1cc(C(C)C)c(N2[C]N3C(=N2)COC[C@@H]3C(c2ccccc2)c2ccccc2)c(C(C)C)c1
1956	CC(C)c1cc(C(C)C)c(N2[C]N3C(=N2)COC[C@@H]3C)c(C(C)C)c1
1957	CC(C)c1cc(C(C)C)c(N2[C]N3C(=N2)COC[C@@H]3C2CCCCC2)c(C(C)C)c1
1958	CC(C)c1cc(C(C)C)c(N2[C]N3C(=N2)COC[C@@H]3CO[Si](C(C)C)(C(C)C)C(C)C)c(C(C)C)c1
1959	CC(C)c1cc(C(C)C)c(N2[C]N3C(=N2)COC[C@@H]3COc2ccccc2)c(C(C)C)c1
1960	CC(C)c1cc(C(C)C)c(N2[C]N3C(=N2)COC[C@@H]3Cc2ccccc2)c(C(C)C)c1
1961	CC(C)c1cc(C(C)C)c(N2[C]N3C(=N2)COC[C@@H]3c2ccccc2)c(C(C)C)c1
1962	CC(C)c1cc(C(C)C)c(N2[C]N3C(=N2)CO[C@H]2Cc4ccccc4[C@H]23)c(C(C)C)c1
1963	CC(C)c1cc(C(C)C)c(N2[C]N3C(=N2)C[C@@H]2CCc4ccccc4[C@@H]23)c(C(C)C)c1
1964	CC(C)c1cc(C(C)C)c(N2[C]N3C(=N2)OC[C@@H]3C(C)(C)C)c(C(C)C)c1
1965	CC(C)c1cc(C(C)C)c(N2[C]N3C(=N2)OC[C@@H]3C(C)C)c(C(C)C)c1
1966	CC(C)c1cc(C(C)C)c(N2[C]N3C(=N2)OC[C@@H]3C(F)(c2ccccc2)c2ccccc2)c(C(C)C)c1
1967	CC(C)c1cc(C(C)C)c(N2[C]N3C(=N2)OC[C@@H]3C(O)(c2cc(C(F)(F)F)cc(C(F)(F)F)c2)c2cc(C(F)(F)F)cc(C(F)(F)F)c2)c(C(C)C)c1
1968	CC(C)c1cc(C(C)C)c(N2[C]N3C(=N2)OC[C@@H]3C(O)(c2ccccc2)c2ccccc2)c(C(C)C)c1
1969	CC(C)c1cc(C(C)C)c(N2[C]N3C(=N2)OC[C@@H]3C(O[Si](C)(C)C)(c2ccccc2)c2ccccc2)c(C(C)C)c1
1970	CC(C)c1cc(C(C)C)c(N2[C]N3C(=N2)OC[C@@H]3C(c2ccccc2)c2ccccc2)c(C(C)C)c1
1971	CC(C)c1cc(C(C)C)c(N2[C]N3C(=N2)OC[C@@H]3C)c(C(C)C)c1
1972	CC(C)c1cc(C(C)C)c(N2[C]N3C(=N2)OC[C@@H]3C2CCCCC2)c(C(C)C)c1
1973	CC(C)c1cc(C(C)C)c(N2[C]N3C(=N2)OC[C@@H]3CO[Si](C(C)C)(C(C)C)C(C)C)c(C(C)C)c1
1974	CC(C)c1cc(C(C)C)c(N2[C]N3C(=N2)OC[C@@H]3COc2ccccc2)c(C(C)C)c1
1975	CC(C)c1cc(C(C)C)c(N2[C]N3C(=N2)OC[C@@H]3Cc2ccccc2)c(C(C)C)c1
1976	CC(C)c1cc(C(C)C)c(N2[C]N3C(=N2)OC[C@@H]3c2ccccc2)c(C(C)C)c1
1977	CC(C)c1cc(C(C)C)c(N2[C]N3C(=N2)[C@H](C#N)C[C@H]3C(C)(C)C)c(C(C)C)c1
1978	CC(C)c1cc(C(C)C)c(N2[C]N3C(=N2)[C@H](C#N)C[C@H]3C(C)C)c(C(C)C)c1
1979	CC(C)c1cc(C(C)C)c(N2[C]N3C(=N2)[C@H](C#N)C[C@H]3C(F)(c2ccccc2)c2ccccc2)c(C(C)C)c1
1980	CC(C)c1cc(C(C)C)c(N2[C]N3C(=N2)[C@H](C#N)C[C@H]3C(O)(c2cc(C(F)(F)F)cc(C(F)(F)F)c2)c2cc(C(F)(F)F)cc(C(F)(F)F)c2)c(C(C)C)c1
1981	CC(C)c1cc(C(C)C)c(N2[C]N3C(=N2)[C@H](C#N)C[C@H]3C(O)(c2ccccc2)c2ccccc2)c(C(C)C)c1
1982	CC(C)c1cc(C(C)C)c(N2[C]N3C(=N2)[C@H](C#N)C[C@H]3C(O[Si](C)(C)C)(c2ccccc2)c2ccccc2)c(C(C)C)c1
1983	CC(C)c1cc(C(C)C)c(N2[C]N3C(=N2)[C@H](C#N)C[C@H]3C(c2ccccc2)c2ccccc2)c(C(C)C)c1
1984	CC(C)c1cc(C(C)C)c(N2[C]N3C(=N2)[C@H](C#N)C[C@H]3C)c(C(C)C)c1
1985	CC(C)c1cc(C(C)C)c(N2[C]N3C(=N2)[C@H](C#N)C[C@H]3C2CCCCC2)c(C(C)C)c1
1986	CC(C)c1cc(C(C)C)c(N2[C]N3C(=N2)[C@H](C#N)C[C@H]3CO[Si](C(C)C)(C(C)C)C(C)C)c(C(C)C)c1
1987	CC(C)c1cc(C(C)C)c(N2[C]N3C(=N2)[C@H](C#N)C[C@H]3COc2ccccc2)c(C(C)C)c1
1988	CC(C)c1cc(C(C)C)c(N2[C]N3C(=N2)[C@H](C#N)C[C@H]3Cc2ccccc2)c(C(C)C)c1
1989	CC(C)c1cc(C(C)C)c(N2[C]N3C(=N2)[C@H](C#N)C[C@H]3c2ccccc2)c(C(C)C)c1
1990	CC(C)c1cc(C(C)C)c(N2[C]N3C(=N2)[C@H](C(C)C)C[C@H]3C(C)(C)C)c(C(C)C)c1
1991	CC(C)c1cc(C(C)C)c(N2[C]N3C(=N2)[C@H](C(C)C)C[C@H]3C(C)C)c(C(C)C)c1
1992	CC(C)c1cc(C(C)C)c(N2[C]N3C(=N2)[C@H](C(C)C)C[C@H]3C(F)(c2ccccc2)c2ccccc2)c(C(C)C)c1
1993	CC(C)c1cc(C(C)C)c(N2[C]N3C(=N2)[C@H](C(C)C)C[C@H]3C(O)(c2cc(C(F)(F)F)cc(C(F)(F)F)c2)c2cc(C(F)(F)F)cc(C(F)(F)F)c2)c(C(C)C)c1
1994	CC(C)c1cc(C(C)C)c(N2[C]N3C(=N2)[C@H](C(C)C)C[C@H]3C(O)(c2ccccc2)c2ccccc2)c(C(C)C)c1
1995	CC(C)c1cc(C(C)C)c(N2[C]N3C(=N2)[C@H](C(C)C)C[C@H]3C(O[Si](C)(C)C)(c2ccccc2)c2ccccc2)c(C(C)C)c1
1996	CC(C)c1cc(C(C)C)c(N2[C]N3C(=N2)[C@H](C(C)C)C[C@H]3C(c2ccccc2)c2ccccc2)c(C(C)C)c1
1997	CC(C)c1cc(C(C)C)c(N2[C]N3C(=N2)[C@H](C(C)C)C[C@H]3C)c(C(C)C)c1
1998	CC(C)c1cc(C(C)C)c(N2[C]N3C(=N2)[C@H](C(C)C)C[C@H]3C2CCCCC2)c(C(C)C)c1
1999	CC(C)c1cc(C(C)C)c(N2[C]N3C(=N2)[C@H](C(C)C)C[C@H]3CO[Si](C(C)C)(C(C)C)C(C)C)c(C(C)C)c1
2000	CC(C)c1cc(C(C)C)c(N2[C]N3C(=N2)[C@H](C(C)C)C[C@H]3COc2ccccc2)c(C(C)C)c1
2001	CC(C)c1cc(C(C)C)c(N2[C]N3C(=N2)[C@H](C(C)C)C[C@H]3Cc2ccccc2)c(C(C)C)c1
2002	CC(C)c1cc(C(C)C)c(N2[C]N3C(=N2)[C@H](C(C)C)C[C@H]3c2ccccc2)c(C(C)C)c1
2003	CC(C)c1cc(C(C)C)c(N2[C]N3C(=N2)[C@H](C(F)(F)F)C[C@H]3C(C)(C)C)c(C(C)C)c1
2004	CC(C)c1cc(C(C)C)c(N2[C]N3C(=N2)[C@H](C(F)(F)F)C[C@H]3C(C)C)c(C(C)C)c1
2005	CC(C)c1cc(C(C)C)c(N2[C]N3C(=N2)[C@H](C(F)(F)F)C[C@H]3C(F)(c2ccccc2)c2ccccc2)c(C(C)C)c1
2006	CC(C)c1cc(C(C)C)c(N2[C]N3C(=N2)[C@H](C(F)(F)F)C[C@H]3C(O)(c2cc(C(F)(F)F)cc(C(F)(F)F)c2)c2cc(C(F)(F)F)cc(C(F)(F)F)c2)c(C(C)C)c1
2007	CC(C)c1cc(C(C)C)c(N2[C]N3C(=N2)[C@H](C(F)(F)F)C[C@H]3C(O)(c2ccccc2)c2ccccc2)c(C(C)C)c1
2008	CC(C)c1cc(C(C)C)c(N2[C]N3C(=N2)[C@H](C(F)(F)F)C[C@H]3C(O[Si](C)(C)C)(c2ccccc2)c2ccccc2)c(C(C)C)c1
2009	CC(C)c1cc(C(C)C)c(N2[C]N3C(=N2)[C@H](C(F)(F)F)C[C@H]3C(c2ccccc2)c2ccccc2)c(C(C)C)c1
2010	CC(C)c1cc(C(C)C)c(N2[C]N3C(=N2)[C@H](C(F)(F)F)C[C@H]3C)c(C(C)C)c1
2011	CC(C)c1cc(C(C)C)c(N2[C]N3C(=N2)[C@H](C(F)(F)F)C[C@H]3C2CCCCC2)c(C(C)C)c1
2012	CC(C)c1cc(C(C)C)c(N2[C]N3C(=N2)[C@H](C(F)(F)F)C[C@H]3CO[Si](C(C)C)(C(C)C)C(C)C)c(C(C)C)c1
2013	CC(C)c1cc(C(C)C)c(N2[C]N3C(=N2)[C@H](C(F)(F)F)C[C@H]3COc2ccccc2)c(C(C)C)c1
2014	CC(C)c1cc(C(C)C)c(N2[C]N3C(=N2)[C@H](C(F)(F)F)C[C@H]3Cc2ccccc2)c(C(C)C)c1
2015	CC(C)c1cc(C(C)C)c(N2[C]N3C(=N2)[C@H](C(F)(F)F)C[C@H]3c2ccccc2)c(C(C)C)c1
2016	CC(C)c1cc(C(C)C)c(N2[C]N3C(=N2)[C@H](C)C[C@H]3C(C)(C)C)c(C(C)C)c1
2017	CC(C)c1cc(C(C)C)c(N2[C]N3C(=N2)[C@H](C)C[C@H]3C(C)C)c(C(C)C)c1
2018	CC(C)c1cc(C(C)C)c(N2[C]N3C(=N2)[C@H](C)C[C@H]3C(F)(c2ccccc2)c2ccccc2)c(C(C)C)c1
2020	CC(C)c1cc(C(C)C)c(N2[C]N3C(=N2)[C@H](C)C[C@H]3C(O)(c2ccccc2)c2ccccc2)c(C(C)C)c1
2021	CC(C)c1cc(C(C)C)c(N2[C]N3C(=N2)[C@H](C)C[C@H]3C(O[Si](C)(C)C)(c2ccccc2)c2ccccc2)c(C(C)C)c1
2022	CC(C)c1cc(C(C)C)c(N2[C]N3C(=N2)[C@H](C)C[C@H]3C(c2ccccc2)c2ccccc2)c(C(C)C)c1
2023	CC(C)c1cc(C(C)C)c(N2[C]N3C(=N2)[C@H](C)C[C@H]3C)c(C(C)C)c1
2024	CC(C)c1cc(C(C)C)c(N2[C]N3C(=N2)[C@H](C)C[C@H]3C2CCCCC2)c(C(C)C)c1
2025	CC(C)c1cc(C(C)C)c(N2[C]N3C(=N2)[C@H](C)C[C@H]3CO[Si](C(C)C)(C(C)C)C(C)C)c(C(C)C)c1
2026	CC(C)c1cc(C(C)C)c(N2[C]N3C(=N2)[C@H](C)C[C@H]3COc2ccccc2)c(C(C)C)c1
2027	CC(C)c1cc(C(C)C)c(N2[C]N3C(=N2)[C@H](C)C[C@H]3Cc2ccccc2)c(C(C)C)c1
2028	CC(C)c1cc(C(C)C)c(N2[C]N3C(=N2)[C@H](C)C[C@H]3c2ccccc2)c(C(C)C)c1
2029	CC(C)c1cc(C(C)C)c(N2[C]N3C(=N2)[C@H](CCO)C[C@H]3C(C)(C)C)c(C(C)C)c1
2030	CC(C)c1cc(C(C)C)c(N2[C]N3C(=N2)[C@H](CCO)C[C@H]3C(C)C)c(C(C)C)c1
2031	CC(C)c1cc(C(C)C)c(N2[C]N3C(=N2)[C@H](CCO)C[C@H]3C(F)(c2ccccc2)c2ccccc2)c(C(C)C)c1
2032	CC(C)c1cc(C(C)C)c(N2[C]N3C(=N2)[C@H](CCO)C[C@H]3C(O)(c2cc(C(F)(F)F)cc(C(F)(F)F)c2)c2cc(C(F)(F)F)cc(C(F)(F)F)c2)c(C(C)C)c1
2033	CC(C)c1cc(C(C)C)c(N2[C]N3C(=N2)[C@H](CCO)C[C@H]3C(O)(c2ccccc2)c2ccccc2)c(C(C)C)c1
2034	CC(C)c1cc(C(C)C)c(N2[C]N3C(=N2)[C@H](CCO)C[C@H]3C(O[Si](C)(C)C)(c2ccccc2)c2ccccc2)c(C(C)C)c1
2035	CC(C)c1cc(C(C)C)c(N2[C]N3C(=N2)[C@H](CCO)C[C@H]3C(c2ccccc2)c2ccccc2)c(C(C)C)c1
[truncated: 6,623 more rows]

## Sheet: Complex_selected_for_DFT
file	BE(kcal/mol)
Ba_3109	-47.5801
Ba_7319	-48.568
Ba_2512	-49.6136
Ba_2953	-52.0145
Ba_7313	-52.857
Ba_6948	-52.8846
Ba_6319	-55.2967
Ba_7323	-55.7661
Ba_7907	-56.302
Ba_7318	-56.4661
Sr_3109	-56.817
Ba_6860	-57.4497
Sr_7319	-57.6895
Ba_7043	-57.7779
Ba_7910	-57.9692
Ba_6855	-58.0038
Ba_2509	-58.0362
Ba_6664	-58.6194
Ba_2956	-58.8598
Sr_2512	-59.1223
Ba_7253	-60.6889
Ba_3114	-60.9456
Ba_6950	-61.3089
Ba_6676	-61.3773
Sr_2953	-62.1099
Sr_7313	-62.4887
Ba_7301	-62.6392
Ba_8237	-62.7136
Sr_7650	-62.9568
Ba_2519	-62.9767
Ba_8769	-63.173
Ba_2309	-63.7471
Ba_902	-63.8899
Ba_7248	-63.9124
Ba_2976	-63.9683
Ba_3113	-64.5826
Ba_7244	-64.7363
Ba_4395	-64.9562
Sr_7325	-65.0495
Ba_911	-65.1105
Ba_6859	-65.1121
Sr_7323	-65.4498
Sr_7907	-65.9989
Ba_7237	-66.4845
Ba_6313	-66.5229
Ba_7657	-66.6408
Sr_2509	-66.7705
Ba_905	-66.8912
Sr_7318	-67.4732
Ba_7494	-67.6059
Sr_7910	-67.6428
Ba_3099	-68.1651
Ba_7227	-68.3797
Ba_2505	-68.4372
Sr_7134	-68.9302
Sr_2956	-69.0173
Sr_3672	-69.0586
Sr_6948	-69.1032
Sr_6855	-69.2161
Ba_2303	-69.3637
Ba_4345	-69.5656
Sr_2309	-69.8427
Sr_6319	-69.8675
Ba_6629	-70.1775
Sr_6664	-70.3005
Sr_6682	-70.5178
Ba_2491	-70.6514
Sr_6542	-70.7523
Sr_3114	-70.9368
Ba_6043	-71.0146
Ca_3109	-71.1659
Ba_7048	-71.4074
Ba_7251	-71.563
Sr_7253	-71.7211
Sr_6860	-72.1968
Ba_7656	-72.198
Ba_6755	-72.5276
Ba_6150	-72.7917
Sr_8769	-73.1968
Sr_2519	-73.2214
Ba_7035	-73.2695
Ca_7319	-73.5783
Ba_2359	-73.7474
Sr_2962	-73.7751
Ca_2512	-73.9338
Sr_2976	-74.2632
Ba_6271	-74.2695
Sr_6950	-74.2902
Ba_6853	-74.3165
Sr_7301	-74.373
Ba_6637	-74.7024
Ba_7231	-74.713
Ba_6461	-74.7407
Sr_3113	-74.9641
Ca_3102	-75.7546
Sr_7138	-75.8722
Ba_6635	-75.9073
Ba_6617	-75.9681
Sr_4395	-76.0217
Ba_724	-76.1344
Ba_1426	-76.1645
Ba_6621	-76.2235
Sr_2303	-76.26
Ba_3741	-76.3697
Ca_6313	-76.4137
Ba_4410	-76.4733
Sr_6859	-76.5033
Sr_7248	-76.5053
Sr_905	-76.7933
Sr_7046	-76.8755
Ba_6021	-77.1133
Sr_7244	-77.146
Ba_6942	-77.4084
Ca_2953	-77.5147
Ba_2996	-77.7172
Ba_8747	-77.7523
Sr_7237	-77.8092
Sr_2505	-78.0036
Ba_176	-78.0602
Sr_7657	-78.1092
Sr_7494	-78.1361
Sr_6313	-78.3997
Ba_7234	-78.6244
Ba_6957	-78.7942
Sr_3099	-78.8472
Ba_2126	-79.0088
Ba_6847	-79.208
Ba_681	-79.42
Ba_2789	-79.4521
Ba_6295	-79.4841
Ba_3709	-79.565
Ba_2253	-79.6991
Ba_4343	-79.7827
Ba_1423	-79.8223
Ba_2346	-79.8392
Ba_2642	-79.8424
Ba_6913	-80.0281
Ba_7343	-80.0852
Ba_6539	-80.1938
Ba_2587	-80.2089
Sr_7227	-80.2942
Ba_2515	-80.5887
Ba_7788	-80.9035
Ba_1417	-81.1752
Sr_2281	-81.2689
Ba_987	-81.2838
Ba_6214	-81.2944
Ba_2978	-81.3862
Sr_2491	-81.6893
Sr_3418	-81.8677
Ba_158	-81.9301
Ba_804	-82.07
Ca_7907	-82.321
Ba_6002	-82.4464
Sr_6629	-82.5588
Ba_1474	-82.5883
Ba_942	-82.6456
Sr_7251	-82.6774
Ca_2509	-82.697
Ba_84	-82.84
Ba_6331	-82.9316
Ba_3775	-83.0602
Ba_1428	-83.0853
Ba_7243	-83.2002
Ba_155	-83.2033
Sr_6755	-83.2361
Sr_6043	-83.2397
Ba_3004	-83.3937
Ba_894	-83.4282
Ba_2322	-83.4778
Sr_7656	-83.93
Ba_765	-84.046
Ca_2956	-84.1763
Sr_4410	-84.2142
Ba_3458	-84.4156
Ca_6855	-84.9158
Sr_6150	-85.0294
Ba_2542	-85.0959
Ba_6027	-85.1517
Ba_1046	-85.2189
Ba_2700	-85.2715
Ca_3114	-85.4071
Ca_6948	-85.4743
Ba_2506	-85.4887
Ba_103	-85.5715
Ba_3546	-85.7673
Sr_7035	-86.0405
Ca_6664	-86.1871
Ba_233	-86.1921
Ba_218	-86.28
Ca_7323	-86.2856
Ba_1397	-86.3233
Ba_2699	-86.3549
Ca_7318	-86.3654
Ba_3742	-86.4896
Ba_6937	-86.5109
Sr_2359	-86.59
Ba_58	-86.6188
Ba_7506	-86.7067
Ba_7055	-86.8529
Ba_120	-86.8692
Ca_7043	-86.9106
Sr_6637	-86.9332
Sr_5770	-87.0111
Ba_875	-87.119
Ba_3904	-87.1861
Ba_6218	-87.3455
Sr_6461	-87.3649
Ba_8531	-87.3756
Sr_7231	-87.4383
Sr_6853	-87.7578
Sr_6679	-87.8663
Ca_902	-87.8742
Sr_2967	-87.954
Sr_1426	-87.9617
Ba_2319	-88.082
Sr_6635	-88.2811
Ca_7134	-88.2945
Sr_724	-88.4386
Ca_6860	-88.5252
Ba_6905	-88.6105
Ba_815	-88.6432
Ba_2585	-88.7135
Sr_6617	-88.7925
Sr_8747	-88.7984
Ba_620	-88.8986
Ba_8768	-88.9053
Ba_3951	-89.0972
Sr_6271	-89.1264
Ba_1213	-89.1584
Ba_186	-89.2223
Ba_6640	-89.2242
Ba_229	-89.2581
Ba_2726	-89.2613
Ba_931	-89.3309
Sr_6021	-89.3767
Ba_1442	-89.383
Sr_6621	-89.56
Ba_171	-89.6271
Ca_905	-89.8527
Ca_2962	-89.9058
Ca_2976	-89.9367
Ba_7091	-90.1699
Sr_2126	-90.2381
Ba_3982	-90.2419
Ca_7253	-90.2904
Sr_6942	-90.5685
Ca_911	-90.7168
Sr_6539	-90.7573
Ca_3113	-90.7585
Ba_3056	-90.8919
Ba_6008	-91.0089
Ba_167	-91.0547
Ba_7275	-91.0886
Ba_2606	-91.2586
Sr_176	-91.2881
Ba_6660	-91.3395
Ba_8534	-91.4755
Sr_4343	-91.5447
Sr_6957	-91.5521
Sr_7234	-91.6841
Ca_6950	-91.7092
Ba_1009	-91.7092
Ba_6065	-91.9451
Sr_6295	-91.9571
Ba_8343	-92.1158
Sr_2253	-92.1313
Ca_7301	-92.1855
Sr_681	-92.2194
Sr_7343	-92.3342
Sr_6847	-92.3612
Sr_1570	-92.3787
Ba_3637	-92.3844
Sr_3709	-92.3894
Ba_922	-92.4402
Ca_6859	-92.5699
Sr_2587	-92.5959
Sr_2789	-92.6316
Ca_2519	-92.7443
Ca_4395	-92.8768
Sr_7141	-92.9259
Sr_2978	-92.9587
Ba_3693	-93.0445
Ca_2505	-93.1069
Sr_1423	-93.1462
Ba_242	-93.161
Sr_2346	-93.2296
Ca_7248	-93.2378
Ba_8563	-93.3947
Sr_6913	-93.4235
Ba_72	-93.4406
Ca_8237	-93.4728
Ca_7046	-93.5767
Ba_7626	-93.5867
Ca_7494	-93.732
Sr_987	-93.8753
Sr_6214	-93.9099
Ba_1689	-93.9111
Sr_2642	-94.1307
Ba_5608	-94.1698
Sr_6820	-94.2318
Ca_2309	-94.2663
Sr_6002	-94.3816
Ba_7844	-94.3849
Ba_6041	-94.6591
Sr_7218	-94.6654
Ca_3099	-94.7441
Ba_7159	-94.7796
Ba_7172	-94.8863
Sr_1474	-94.9114
Ba_2659	-95.0362
Sr_7788	-95.0595
Sr_158	-95.1454
Ca_7237	-95.2673
Ba_8190	-95.2992
Sr_84	-95.3751
Sr_1046	-95.4592
Ba_3019	-95.4617
Ba_562	-95.4818
Sr_6331	-95.4837
Ba_7847	-95.4981
Sr_1428	-95.7717
Ca_7244	-95.8307
Ca_7657	-95.8514
Sr_3775	-95.8696
Ba_1350	-95.9411
Sr_1417	-96.0189
Ba_3189	-96.0347
Ca_2223	-96.2064
Ba_5721	-96.2574
Ba_124	-96.3973
Ca_7227	-96.6458
Ba_7142	-96.659
Ba_6206	-96.6916
Sr_6534	-96.717
Ba_8737	-96.7266
Ba_5498	-96.7783
Sr_894	-96.7973
Ca_4345	-96.8477
Sr_2322	-97.4537
Ba_6654	-97.5042
Sr_2542	-97.5274
Ba_1604	-97.5538
Ba_5298	-97.577
Ba_6305	-97.6078
Sr_7674	-97.6893
Sr_2700	-97.9453
Ba_5981	-98.0395
Ba_8223	-98.059
Sr_6027	-98.101
Sr_2506	-98.1041
Sr_7243	-98.3746
Sr_103	-98.6501
Sr_3004	-98.9704
Sr_218	-99.0598
Ca_6755	-99.0823
Ba_2408	-99.1797
Ba_7756	-99.3064
Sr_7055	-99.329
Sr_417	-99.4319
Ba_3247	-99.4702
Ba_7687	-99.4947
Ca_3418	-99.5359
Ba_8214	-99.5844
Ba_8197	-99.6095
Ba_7333	-99.671
Ba_7284	-99.7482
Ba_3863	-99.7578
Sr_6937	-99.9189
Sr_233	-99.9252
Sr_2677	-99.9634
Sr_765	-100.04
Sr_1397	-100.072
Sr_120	-100.196
Ba_116	-100.279
Ba_6017	-100.294
Sr_3742	-100.37
Ba_5916	-100.374
Sr_6218	-100.484
Ba_2325	-100.497
Ca_6629	-100.509
Ba_7570	-100.6
Ba_4156	-100.624
Ba_794	-100.625
Sr_8531	-100.632
Ba_1898	-100.642
Ba_5862	-100.66
Sr_7506	-100.705
Ba_5982	-101.257
Ca_6043	-101.426
Ba_3213	-101.523
Ba_5859	-101.685
Ca_7048	-101.738
Ba_8535	-101.756
Ba_5262	-101.791
Ba_3240	-101.81
Sr_620	-101.844
Ba_2779	-101.931
Sr_2585	-101.936
Ba_473	-101.947
Sr_875	-101.958
Sr_8768	-101.988
Ba_2989	-102.035
Sr_58	-102.064
Sr_3904	-102.067
Ba_7289	-102.174
Sr_2699	-102.329
Ca_7656	-102.41
Sr_186	-102.477
Ba_7566	-102.5
Sr_931	-102.546
Ca_6150	-102.71
Sr_1272	-102.713
Sr_252	-102.827
Sr_7091	-103.016
Sr_6640	-103.094
Sr_6905	-103.198
Ca_7251	-103.371
Ba_4421	-103.403
Sr_815	-103.553
Sr_229	-103.833
Sr_2616	-103.853
Ba_5905	-103.866
Ba_3452	-103.9
Ba_7334	-103.905
Sr_1442	-103.978
Ba_4878	-104.008
Sr_167	-104.287
Ba_3467	-104.356
Ca_2491	-104.366
Ca_5770	-104.37
Ba_392	-104.401
Ba_6829	-104.412
Ca_6637	-104.434
Sr_6008	-104.448
Ca_7035	-104.558
Ba_3071	-104.575
Sr_171	-104.62
Sr_3951	-104.623
Ba_2455	-104.647
Ba_5071	-104.704
Ba_7861	-104.714
Ba_6452	-104.848
Ba_7072	-104.869
Sr_8534	-104.871
Ca_8747	-104.909
Sr_2319	-105.002
Ca_4410	-105.255
Sr_1009	-105.255
Sr_3982	-105.326
Ba_5878	-105.528
Ba_1611	-105.539
Sr_6304	-105.743
Sr_3637	-105.955
Sr_3056	-106
Sr_7275	-106.105
Ba_2119	-106.159
Sr_8343	-106.205
Ba_7764	-106.27
Sr_6065	-106.299
Ca_6461	-106.514
Ca_2126	-106.557
Sr_6660	-106.76
Ca_724	-106.768
Ca_6621	-106.768
Ba_6813	-106.78
Ca_6635	-106.867
Ba_4842	-106.953
Ba_3089	-107.026
Sr_5608	-107.031
Ba_7714	-107.167
Sr_3693	-107.176
Ba_763	-107.213
Sr_922	-107.344
Ba_661	-107.377
Ca_1426	-107.506
Ca_6679	-107.514
Ca_6617	-107.642
Ba_7357	-107.667
Sr_6206	-107.755
Ba_2351	-107.81
Sr_5498	-107.969
Ba_6375	-108.102
Ba_640	-108.132
Ba_7394	-108.209
Ca_3741	-108.21
Ba_4921	-108.297
Ca_6271	-108.301
Ba_2807	-108.346
Sr_563	-108.361
Sr_8190	-108.368
Ba_1495	-108.378
Sr_2659	-108.385
Ba_3890	-108.411
Ca_2515	-108.491
Ba_2539	-108.493
Ba_4836	-108.543
Ba_75	-108.71
Ba_550	-108.76
Sr_7626	-108.774
Ba_3053	-108.873
Ba_4810	-108.904
Ba_7892	-108.926
Ba_1878	-109.068
Ba_3824	-109.068
Ba_5066	-109.099
Ba_5243	-109.11
Sr_562	-109.129
Ba_3594	-109.155
Ca_4343	-109.322
Ba_5198	-109.33
Ca_6021	-109.51
Sr_3189	-109.584
Ba_4216	-109.624
Sr_6305	-109.628
Ba_2144	-109.648
Sr_7172	-109.655
Ba_2566	-109.732
Ba_7891	-109.751
Ca_6942	-109.753
Ba_3852	-109.806
Sr_8563	-109.819
Ca_2253	-109.859
Ca_6539	-109.913
Ba_4317	-109.948
Ca_6295	-109.95
Ca_6957	-109.998
Sr_7159	-110.071
Ba_5072	-110.105
Ba_6506	-110.142
Sr_6041	-110.167
Sr_5721	-110.256
Sr_7142	-110.292
Ca_176	-110.335
Ca_7234	-110.344
Sr_124	-110.351
Ca_2978	-110.434
Sr_5987	-110.457
Ba_2533	-110.485
Sr_3019	-110.501
Ca_6002	-110.534
Sr_494	-110.538
Ba_796	-110.592
Ba_3857	-110.705
Ca_6847	-110.728
Ba_8471	-110.871
Sr_6654	-110.969
Ba_4094	-110.984
Ba_6700	-111.013
Ca_681	-111.015
Ba_4246	-111.102
Ca_7343	-111.355
Ba_5052	-111.372
Ca_2996	-111.684
Ba_772	-111.703
Sr_5981	-111.732
Ba_6717	-111.768
Ba_8553	-111.98
Ca_7141	-112.077
Ba_866	-112.142
Ba_7003	-112.164
Sr_8737	-112.278
Ca_942	-112.295
Ba_4963	-112.302
Ca_1570	-112.444
Ca_2789	-112.51
Ca_3709	-112.527
Ba_7085	-112.615
Ba_3204	-112.691
Sr_8214	-112.844
Sr_1405	-112.895
Ba_7868	-112.927
Ba_5410	-112.972
Ba_6933	-113.05
Ca_2587	-113.054
Ca_1423	-113.105
Ba_6415	-113.211
Ca_6214	-113.266
Ca_2346	-113.268
Sr_8197	-113.321
Sr_7847	-113.43
Sr_3247	-113.507
Sr_8223	-113.538
Ba_7408	-113.627
Ba_3479	-113.663
Ca_6534	-113.785
Ca_6913	-113.835
Ca_987	-113.913
Ba_3927	-113.914
Sr_5916	-114.162
Ba_7457	-114.206
Ca_2642	-114.529
Ca_6331	-114.546
Ba_5090	-114.705
Ca_7788	-114.743
Ca_1428	-114.78
Sr_5982	-114.81
Sr_7687	-114.894
Sr_116	-114.983
Sr_2325	-115.027
Ba_8069	-115.079
Ba_3679	-115.124
Ca_3775	-115.2
Ba_6803	-115.228
Sr_7284	-115.296
Ba_131	-115.303
Sr_7756	-115.305
Ba_1801	-115.309
Ba_5148	-115.312
Sr_5859	-115.494
Ca_2700	-115.533
Sr_5262	-115.589
Sr_3240	-115.603
Ba_5889	-115.612
Ca_7218	-115.67
Ba_2993	-115.707
Ca_2506	-115.774
Sr_473	-115.778
Ca_1046	-115.794
Sr_2779	-115.968
Ba_3045	-116.156
Ca_84	-116.193
Sr_3213	-116.267
Ba_5941	-116.287
Sr_3452	-116.306
Sr_7570	-116.347
Ba_4609	-116.348
Ba_1676	-116.376
Ca_3458	-116.4
Ba_7691	-116.484
Ba_8072	-116.557
Ba_3586	-116.618
Sr_308	-116.633
Ba_8157	-116.663
Sr_7844	-116.767
Ba_3556	-116.784
Ba_6601	-116.816
Sr_6017	-116.939
Sr_3863	-117.193
Ba_5847	-117.256
Ca_894	-117.321
Ba_3645	-117.371
Ba_4252	-117.476
Ba_6486	-117.485
Ca_6027	-117.505
Sr_794	-117.527
Ba_1070	-117.62
Ba_7694	-117.642
Ba_459	-117.654
Ba_412	-117.756
Sr_7289	-117.838
Sr_5905	-117.851
Sr_8535	-117.853
Ba_1663	-117.913
Sr_392	-117.926
Ba_6410	-118.129
Ca_124	-118.14
Sr_1611	-118.199
Ca_2542	-118.311
Sr_4421	-118.314
Ca_7674	-118.316
Sr_6506	-118.324
Sr_4887	-118.466
Mg_3109	-118.505
Ba_3491	-118.673
Mg_3102	-118.681
Ba_4919	-118.846
Ba_5456	-118.863
Ba_485	-118.984
Ca_2322	-119.009
Ca_155	-119.034
Sr_5876	-119.152
Ca_103	-119.237
Sr_5071	-119.25
Ca_218	-119.361
Ba_4145	-119.384
Sr_5878	-119.393
Ba_8073	-119.667
Ba_1196	-119.815
Ba_920	-119.913
Ba_5415	-119.994
Ca_7243	-120.124
Ca_8531	-120.281
Ba_2121	-120.409
Ba_766	-120.484
Sr_661	-120.514
Ca_3742	-120.523
Sr_7861	-120.533
Sr_1898	-120.602
Sr_7334	-120.669
Sr_550	-120.703
Ca_620	-120.719
Ba_1085	-120.738
Ba_1337	-120.823
Ca_6218	-120.832
Sr_796	-120.839
Ca_6937	-120.84
Ba_1124	-120.879
Ba_8315	-120.898
Sr_3017	-120.906
Sr_2539	-120.908
Ca_1397	-120.937
Ca_8768	-121.017
Ca_2677	-121.025
Sr_2119	-121.043
Ca_120	-121.066
Ba_6248	-121.227
Ca_2319	-121.342
Ba_7188	-121.419
Sr_4842	-121.562
Ba_1093	-121.564
Sr_7053	-121.595
Sr_5198	-121.679
Sr_3071	-121.935
Ca_6744	-121.986
Ba_5908	-122.157
Ba_4629	-122.318
Ba_1148	-122.346
Sr_7764	-122.41
Ca_2726	-122.551
Ba_4602	-122.576
Ca_7506	-122.751
Ca_233	-122.783
Ca_2585	-122.92
Sr_3089	-122.937
Ba_4896	-122.972
Ba_1953	-123.12
Ba_8333	-123.172
Ba_8358	-123.221
Sr_763	-123.222
Ca_58	-123.233
Ba_3716	-123.403
Sr_4836	-123.456
Sr_4811	-123.457
Ba_8158	-123.473
Sr_5243	-123.531
Ca_186	-123.554
Sr_4810	-123.594
Ca_765	-123.601
Sr_2989	-123.625
Ca_6024	-123.739
Sr_640	-123.794
Sr_7566	-123.843
Ca_931	-123.888
Sr_2566	-123.933
Sr_5066	-123.955
Ca_8534	-124.01
Ba_1757	-124.115
Ca_1272	-124.161
Ca_6640	-124.19
Ca_875	-124.215
Sr_3467	-124.278
Ba_3193	-124.326
Sr_3824	-124.329
Sr_2455	-124.37
Ba_8492	-124.406
Sr_6813	-124.432
Sr_5818	-124.45
Mg_2509	-124.573
Ba_3874	-124.926
Ca_252	-124.931
Sr_7357	-124.969
Sr_2144	-125.004
Ba_3225	-125.091
Ca_7091	-125.225
Ca_167	-125.242
Sr_7394	-125.246
Ca_2616	-125.326
Ca_3904	-125.336
Sr_6375	-125.337
Ba_4173	-125.41
Sr_2807	-125.42
Sr_1495	-125.48
Sr_2533	-125.51
Ba_3474	-125.512
Sr_2351	-125.656
Ca_6008	-125.676
Sr_4216	-125.682
Ca_6905	-125.852
Ca_242	-125.963
Sr_3594	-126.133
Sr_3857	-126.178
Sr_75	-126.232
Sr_7892	-126.257
Ba_4754	-126.276
Ba_1329	-126.382
Ba_463	-126.631
Ca_1442	-126.702
Ca_229	-126.727
Ca_815	-126.781
Ca_3637	-126.956
Sr_6556	-126.974
Sr_4317	-126.999
Ca_3693	-127.018
Ca_417	-127.184
Ca_6304	-127.196
Sr_1509	-127.239
Mg_2953	-127.245
Ba_3143	-127.379
Ba_8110	-127.401
Sr_6334	-127.411
Ba_4712	-127.585
Sr_4963	-127.615
Ca_171	-127.638
Ca_6660	-127.721
Ca_8190	-127.832
Ca_3982	-127.954
Ca_8343	-127.984
Ba_1836	-128.218
Sr_553	-128.298
Ba_6368	-128.304
Ca_72	-128.427
Sr_3852	-128.442
Ca_3056	-128.447
Ca_2659	-128.541
Ca_6762	-128.581
Ca_6065	-128.606
Sr_6717	-128.772
Sr_3890	-129.016
Ba_8141	-129.06
Ca_5608	-129.132
Ba_4700	-129.252
Sr_3971	-129.256
Ca_9	-129.264
Ba_1875	-129.331
Ca_922	-129.398
Ca_7142	-129.555
Ca_494	-129.565
Sr_7003	-129.651
Sr_6067	-129.769
Ca_7275	-129.859
Sr_5090	-129.882
Ca_5498	-129.924
Ca_3189	-129.966
Ba_605	-130.143
Sr_2434	-130.16
Sr_1781	-130.164
Ca_7172	-130.25
Sr_4700	-130.379
Sr_5410	-130.405
Ba_4193	-130.442
Sr_7085	-130.464
Ba_3268	-130.513
Sr_7891	-130.595
Sr_866	-130.629
Sr_7868	-130.632
Sr_921	-130.644
Ca_3951	-130.732
Sr_5148	-130.762
Sr_3479	-130.992
Mg_2512	-131.1
Sr_6933	-131.103
Ca_562	-131.149
Ca_5987	-131.253
Ca_563	-131.58
Ba_1719	-131.592
Ca_6041	-131.611
Ba_3933	-131.612
Ca_7626	-131.653
Sr_5941	-131.869
Ba_1925	-131.955
Ca_6206	-131.984
Sr_3679	-132.049
Sr_7457	-132.056
Sr_8069	-132.241
Mg_6860	-132.258
Sr_3556	-132.39
Sr_4246	-132.421
Sr_6415	-132.47
Mg_7650	-132.519
Ca_3019	-132.558
Sr_1196	-132.605
Ca_6654	-132.638
Sr_4094	-132.785
Sr_4207	-132.793
Sr_5293	-132.852
Ca_5721	-132.952
Ca_7159	-132.971
Ba_2013	-132.996
Ca_5981	-133.01
Mg_2956	-133.028
Sr_8553	-133.095
Ca_554	-133.139
Ca_8563	-133.152
Ca_5298	-133.204
Sr_131	-133.473
Ca_8737	-133.513
Sr_2993	-133.66
Ca_2690	-133.777
Sr_8072	-133.779
Ca_8197	-133.828
Sr_6515	-134.053
Ca_473	-134.097
Sr_7691	-134.106
Sr_3045	-134.112
Sr_1801	-134.166
Sr_4609	-134.167
Sr_412	-134.216
Mg_6855	-134.299
Sr_4919	-134.299
Sr_6803	-134.407
Ca_3247	-134.408
Sr_6486	-134.555
Sr_485	-134.593
Ba_6383	-134.625
Sr_5847	-134.665
Sr_3645	-134.773
Ba_3805	-134.812
Mg_3114	-134.827
Sr_772	-134.918
Mg_7313	-135.018
Sr_6601	-135.199
Ba_3258	-135.225
Mg_7325	-135.432
Sr_1070	-135.667
Sr_1085	-135.692
Mg_6664	-135.839
Ca_5916	-135.914
Ca_8223	-135.956
Ca_327	-136.1
Sr_4145	-136.259
Sr_2121	-136.441
Sr_3586	-136.471
Ca_5982	-136.499
Sr_5456	-136.553
Sr_3491	-136.938
Sr_8073	-136.938
Mg_7907	-136.963
Ca_5859	-137.005
Ca_2325	-137.209
Mg_8769	-137.245
Mg_7323	-137.342
Ca_2699	-137.484
Mg_7910	-137.67
Sr_8471	-137.738
Ba_3921	-137.76
Sr_327	-137.783
Mg_905	-137.785
Ca_5262	-138.026
Sr_766	-138.082
Ca_3452	-138.164
Sr_8161	-138.265
Ca_1604	-138.405
Ca_2779	-138.476
Ca_4156	-138.557
Ba_1959	-138.6
Sr_8315	-138.631
Sr_1953	-138.658
Sr_1337	-138.724
Ca_3012	-138.866
Ba_1333	-138.899
Sr_4896	-138.932
Mg_6948	-138.968
Ca_392	-139.046
Mg_7309	-139.083
Sr_5175	-139.141
Ca_5878	-139.284
Ca_1611	-139.291
Ca_7756	-139.336
Ca_116	-139.394
Mg_7134	-139.408
Mg_2505	-139.423
Ca_7284	-139.436
Ca_2925	-139.546
Sr_7694	-139.561
Mg_665	-139.594
Sr_1093	-139.643
Ca_6017	-139.752
Ca_5905	-139.784
Sr_5415	-139.879
Ca_7333	-139.881
Ca_7072	-140.001
Mg_2962	-140.002
Ba_4912	-140.051
Sr_8492	-140.135
Mg_7043	-140.238
Sr_3716	-140.264
Ba_8091	-140.285
Mg_2976	-140.293
Ba_4288	-140.355
Ca_3213	-140.389
Sr_920	-140.391
Ca_3546	-140.693
Sr_2013	-140.77
Mg_7318	-140.806
Ca_3143	-140.89
Sr_1124	-140.914
Ba_4113	-141.012
Sr_4629	-141.104
Ca_4421	-141.238
Mg_6682	-141.596
Mg_3113	-141.633
Mg_902	-141.637
Mg_7331	-141.66
Ba_4536	-141.715
Ba_1996	-141.731
Ca_7844	-141.825
Ca_661	-141.966
Sr_8158	-142.064
Mg_911	-142.093
Ca_416	-142.163
Ca_7289	-142.242
Mg_6859	-142.424
Ca_7053	-142.588
Sr_8333	-142.641
Mg_6542	-142.641
Ca_5071	-142.733
Sr_1757	-142.899
Sr_4602	-142.967
Ca_308	-142.969
Sr_3225	-143.075
Sr_3874	-143.403
Ca_7334	-143.545
Sr_463	-143.564
Mg_6676	-143.697
Ca_3863	-143.791
Ca_7861	-143.852
Ca_4887	-144.09
Ca_5876	-144.304
Mg_7494	-144.553
Ca_4878	-144.575
Ca_6452	-144.662
Mg_6670	-144.781
Sr_3474	-144.827
Sr_4712	-144.993
Ca_4842	-144.999
Sr_3143	-145.01
Ca_550	-145.178
Mg_3099	-145.347
Sr_5654	-145.388
Ca_2539	-145.506
Ca_2119	-145.561
Ca_3017	-145.624
Mg_4395	-146.016
Mg_3092	-146.043
Mg_6950	-146.196
Mg_7334	-146.282
Sr_8110	-146.358
Ca_763	-146.359
Ca_2408	-146.395
Ca_3089	-146.407
Sr_3268	-146.456
Mg_2519	-146.461
Ca_5243	-146.498
Ca_5198	-146.556
Ba_2048	-146.612
Sr_605	-146.622
Ca_3052	-146.629
Ca_3071	-146.941
Mg_7248	-146.998
Sr_4173	-147.038
Ca_4836	-147.195
Ba_589	-147.219
Ca_5818	-147.224
Mg_7253	-147.406
Sr_6368	-147.41
Sr_459	-147.464
Ca_7764	-147.557
Sr_1329	-147.588
Mg_7138	-147.805
Ba_4091	-147.805
Ca_4810	-147.938
Mg_6313	-147.979
Sr_8141	-148.018
Mg_4345	-148.16
Sr_4984	-148.254
Sr_1875	-148.258
Mg_8237	-148.279
Ca_2807	-148.324
Ca_4921	-148.469
Ca_1096	-148.52
Ca_2566	-148.7
Mg_7046	-148.793
Mg_6047	-148.799
Ca_640	-148.895
Ca_2144	-148.987
Ca_5072	-149.002
Ca_3824	-149.141
Mg_7244	-149.34
Ba_8302	-149.409
Sr_8026	-149.577
Mg_2491	-149.647
Sr_8120	-149.737
Mg_50	-149.774
Sr_5908	-149.951
Sr_4996	-150.045
Mg_6755	-150.235
Mg_7657	-150.398
Ca_6305	-150.535
Ca_75	-150.573
Ca_6375	-150.61
Ca_5052	-150.679
Ca_3857	-150.713
Ca_7566	-150.854
Ca_5889	-150.953
Ca_1509	-151.36
Mg_2223	-151.767
Ca_4317	-151.844
Ca_2455	-151.89
Ca_7394	-152.265
Ca_8275	-152.269
Sr_1719	-152.462
Ca_4252	-152.601
Ca_6813	-153.016
Mg_6051	-153.07
Ca_5090	-153.498
Ca_6506	-153.678
Ca_3971	-153.967
Ca_553	-154.001
Ca_6820	-154.008
Mg_2303	-154.237
Sr_3805	-154.266
Ca_3204	-154.303
Ca_3467	-154.32
Mg_8525	-154.579
Ca_7892	-154.702
Ca_6334	-155.07
Ca_8553	-155.074
Mg_6043	-155.1
Ca_6067	-155.275
Ca_796	-155.448
Mg_2281	-155.603
Ca_794	-155.615
Ca_6700	-155.629
Ca_7003	-155.785
Mg_7231	-155.879
Sr_6383	-155.917
Ca_6717	-155.978
Sr_8076	-156.076
Ca_7085	-156.245
Mg_6150	-156.258
Ca_4602	-156.336
Ca_6803	-156.374
Mg_3418	-156.421
Ca_3672	-156.803
Ca_7868	-157.072
Mg_8747	-157.214
Mg_2269	-157.256
Mg_7656	-157.295
Ca_7891	-157.297
Sr_1959	-157.468
Ca_3852	-157.502
Ca_5941	-157.54
Mg_1426	-157.664
Ca_6933	-157.67
Ca_804	-157.741
Mg_5770	-157.827
Ca_866	-157.955
Ca_3927	-158.066
Mg_2967	-158.084
Mg_6629	-158.184
Ca_3645	-158.296
Ca_5410	-158.322
Mg_7048	-158.385
Ca_6556	-158.423
Mg_4410	-158.551
Ca_5293	-158.616
Ca_7408	-158.734
Ca_3479	-158.76
Sr_4912	-158.868
Ca_8069	-158.873
Sr_1996	-158.88
Ca_6415	-158.949
Ca_1878	-158.974
Ca_412	-159.018
Ca_459	-159.164
Ca_6486	-159.176
Ca_8072	-159.273
Ca_7457	-159.318
Mg_6637	-159.37
Ca_1350	-159.627
Ca_3045	-159.662
Sr_3921	-159.776
Ca_1196	-159.827
Mg_2126	-159.855
Ca_4207	-159.923
Ca_3556	-160.137
Ca_1781	-160.14
Ca_2351	-160.315
Ca_2993	-160.361
Mg_7251	-160.385
Mg_6853	-160.484
Ca_131	-160.549
Ca_4609	-160.56
Ca_6515	-160.655
Sr_8091	-160.671
Ca_4246	-160.853
Mg_6635	-160.876
Ca_2121	-161.11
Ca_4145	-161.418
Mg_1423	-161.522
Sr_4288	-161.672
Mg_2287	-161.778
Ca_1070	-161.813
Mg_6621	-161.922
Mg_3594	-161.93
Mg_2359	-161.99
Mg_6295	-162.037
Sr_4536	-162.133
Mg_6002	-162.178
Ca_4919	-162.208
Mg_724	-162.39
Ca_5847	-162.408
Ca_6601	-162.644
Ca_8492	-162.783
Ca_3586	-162.842
Ca_8274	-162.957
Ca_8073	-162.977
Mg_6271	-163.053
Mg_4343	-163.087
Ca_8161	-163.095
Ca_3716	-163.176
Ca_1754	-163.201
Mg_7035	-163.33
Ca_8157	-163.358
Ca_3491	-163.395
Mg_2253	-163.509
Mg_6679	-163.53
Mg_6617	-163.8
Ca_485	-164.143
Mg_3741	-164.241
Ca_3053	-164.368
Ca_1676	-164.853
Ca_1663	-164.929
Ca_6410	-165.158
Mg_2996	-165.176
Ca_4896	-165.228
Ca_920	-165.513
Mg_2978	-165.617
Mg_6506	-165.647
Ca_5175	-165.72
Ca_8315	-165.733
Mg_7141	-165.96
Mg_8553	-165.986
Mg_681	-166.231
Ca_8358	-166.262
Mg_6539	-166.267
Mg_7234	-166.301
Ca_2013	-166.361
Ca_1093	-166.939
Ca_7694	-166.97
Mg_6847	-166.997
Mg_7343	-167.352
Mg_942	-167.58
Mg_6021	-167.59
Ca_772	-168.043
Mg_6957	-168.601
Ca_6248	-168.643
Ca_1689	-168.742
Mg_176	-168.948
Mg_6820	-169.114
Mg_3709	-169.115
Sr_589	-169.232
Mg_2587	-169.28
Mg_7457	-169.335
Mg_6942	-169.412
Ca_8158	-169.731
Ca_3225	-169.879
Sr_4091	-169.977
Ca_4629	-170.024
Ca_7188	-170.095
Mg_2515	-170.448
Sr_8047	-170.608
Mg_6534	-170.825
Mg_987	-170.853
Ca_1124	-171.031
Mg_6331	-171.051
Mg_1570	-171.111
Ca_8333	-171.117
Ca_447	-171.424
Ca_1898	-171.602
Ca_3175	-171.688
Mg_6214	-171.781
Ca_2340	-171.867
Mg_6027	-171.889
Mg_45	-171.9
Mg_894	-171.91
Mg_3775	-171.933
Mg_2346	-172.134
Ca_4754	-172.154
Ca_1757	-172.3
Ca_8110	-172.467
Mg_84	-172.59
Mg_2789	-172.734
Ca_3874	-172.872
Ca_5654	-173
Mg_3458	-173.216
Mg_7858	-173.279
Ca_8141	-173.748
Mg_2642	-173.962
Mg_2700	-174.079
Mg_6913	-174.196
Ca_6368	-174.523
Mg_7085	-174.608
Mg_8531	-174.66
Mg_7788	-174.886
Sr_8302	-175.153
Mg_1474	-175.265
Ca_1925	-175.48
Mg_7284	-175.659
Mg_158	-175.718
Mg_6461	-175.82
Ca_5908	-176.116
Ca_8120	-176.23
Mg_103	-176.268
Mg_8768	-176.302
Ca_1329	-176.413
Mg_6008	-176.774
Mg_218	-176.872
Ca_3268	-177.113
Mg_7218	-177.171
Ca_1148	-177.241
Mg_1417	-177.274
Ca_4984	-177.434
Mg_3716	-177.672
Ca_4173	-177.699
Mg_7289	-177.853
Ca_4216	-177.889
Mg_3742	-177.965
Ca_1953	-178.075
Mg_620	-178.248
Mg_2585	-178.299
Ca_8026	-178.504
Mg_8471	-178.784
Mg_6218	-178.979
Mg_8534	-178.997
Mg_1272	-179.136
Mg_2542	-179.141
Mg_2322	-179.563
Ca_4700	-179.972
Mg_6744	-180.054
Mg_417	-180.16
Mg_7674	-180.201
Ca_1875	-180.324
Mg_120	-180.746
Mg_6024	-180.767
Mg_186	-180.87
Sr_4023	-180.988
Mg_2319	-181.367
Mg_72	-181.469
Mg_2677	-181.664
Mg_2726	-181.696
Ca_3805	-181.713
Mg_765	-181.958
Mg_1397	-182.223
Mg_7506	-182.446
Mg_2616	-182.568
Mg_167	-182.775
Ca_3933	-183.008
Mg_7243	-183.023
Mg_1213	-183.394
Mg_5987	-183.435
Mg_563	-183.603
Mg_58	-183.817
Mg_5298	-184.009
Mg_6640	-184.047
Mg_875	-184.428
Mg_815	-184.921
Mg_7091	-184.939
Ca_8076	-185.194
Mg_5981	-185.298
Mg_8343	-185.367
Mg_562	-185.405
Mg_252	-185.461
Mg_2779	-185.584
Mg_6905	-185.623
Mg_3004	-185.646
Mg_3693	-185.736
Mg_2659	-185.752
Mg_554	-185.827
Ca_3258	-186.078
Mg_4207	-186.363
Mg_242	-186.509
Mg_6304	-186.777
Mg_3904	-186.989
Mg_7172	-187.023
Mg_3189	-187.409
Mg_5905	-187.433
Ca_1959	-188.129
Mg_494	-188.213
Mg_171	-188.592
Mg_7142	-188.615
Ca_1333	-188.669
Mg_1442	-188.697
Ca_2048	-188.731
Mg_5608	-188.992
Ca_4912	-189.097
Mg_5982	-189.17
Ca_1996	-189.473
Mg_5262	-189.759
Mg_922	-189.794
Mg_8190	-189.824
Mg_5862	-189.893
Mg_3247	-189.906
Mg_2690	-190.049
Mg_5859	-190.479
Ca_8091	-190.494
Mg_5721	-190.82
Mg_8197	-190.927
Mg_3982	-191.042
Mg_6660	-191.066
Mg_229	-191.523
Mg_3056	-191.598
Mg_6654	-192.037
Ca_4113	-192.47
Mg_7626	-192.646
Mg_8563	-193.034
Mg_3019	-193.05
Mg_4887	-193.321
Mg_3240	-193.364
Mg_155	-193.411
Ca_4288	-193.528
Mg_7053	-195.15
Mg_7159	-195.701
Mg_4842	-196.13
Mg_8223	-196.761
Mg_5878	-196.819
Mg_5456	-196.874
Mg_8737	-197.485
Mg_6065	-197.742
Mg_4145	-198.374
Mg_4156	-198.427
Mg_7072	-198.721
Mg_5198	-199.041
Mg_994	-199.054
Ca_589	-199.077
Mg_2533	-199.145
Mg_4811	-199.51
Be_3102	-199.607
Mg_5071	-199.607
Mg_2325	-199.745
Mg_4810	-200.165
Mg_5243	-200.413
Mg_2566	-200.773
Mg_5052	-200.787
Mg_327	-201.117
Ca_8047	-201.263
Mg_3452	-202.06
Mg_1611	-202.105
Mg_416	-202.498
Mg_7756	-202.498
Mg_4963	-202.68
Mg_392	-202.717
Mg_3143	-202.742
Mg_6206	-203.044
Mg_4421	-203.111
Mg_7570	-203.661
Mg_7333	-203.823
Mg_2925	-204.48
Mg_661	-204.607
Ca_8302	-205.679
Be_3109	-206.617
Mg_5876	-206.71
Be_2509	-206.963
Mg_7844	-207.011
Mg_7861	-207.107
Mg_640	-207.18
Ca_1719	-207.448
Mg_2144	-207.543
Mg_5818	-207.66
Mg_6017	-207.856
Mg_3863	-208.558
Mg_550	-208.827
Mg_7989	-209.287
Mg_2539	-209.634
Mg_763	-209.668
Mg_8535	-210.006
Mg_2699	-210.426
Mg_4216	-210.849
Mg_7764	-211.781
Be_2512	-211.877
Mg_3824	-212.101
Mg_1509	-212.396
Mg_1096	-212.723
Mg_1495	-212.764
Mg_5090	-212.837
Ca_4023	-213.314
Mg_5889	-213.339
Mg_6305	-213.756
Mg_796	-214.031
Mg_8161	-214.176
Mg_3071	-215.281
Mg_4193	-215.386
Mg_2121	-216.128
Mg_553	-216.607
Mg_5941	-216.709
Mg_3813	-216.831
Mg_7566	-217.004
Mg_4317	-217.324
Mg_1350	-217.631
Mg_2807	-217.742
Mg_412	-217.805
Mg_3204	-217.914
Mg_6375	-218.23
Mg_2351	-218.325
Mg_7394	-218.597
Mg_3546	-218.861
Mg_2408	-219.129
Mg_8069	-219.378
Mg_5148	-219.585
Be_902	-219.852
Mg_6452	-220.217
Mg_2008	-220.779
Mg_7892	-221.078
Mg_7003	-221.649
Mg_6700	-221.941
Be_2956	-222.088
Mg_3857	-222.522
Mg_794	-222.778
Mg_6829	-222.83
Mg_6486	-222.868
Mg_1196	-223.21
Mg_2434	-223.324
Mg_308	-223.403
Mg_7868	-223.521
Mg_3927	-224.191
Mg_6933	-224.686
Mg_3672	-224.771
Mg_3971	-224.811
Mg_3175	-224.867
Be_2505	-224.885
Mg_5410	-225.228
Mg_3479	-225.252
Mg_6067	-225.357
Mg_866	-225.605
Mg_4602	-225.76
Mg_4896	-226.001
Mg_8157	-226.087
Be_8769	-226.22
Mg_6803	-226.252
Mg_3467	-226.369
Mg_4609	-226.486
Mg_131	-226.528
Be_3114	-226.761
Mg_6515	-227.201
Mg_3890	-227.86
Mg_5175	-227.884
Mg_8492	-228.137
Mg_7408	-228.202
Mg_3586	-228.953
Mg_6410	-229.08
Mg_124	-229.209
Mg_8073	-229.327
Be_2976	-229.615
Mg_3491	-229.996
Be_2519	-230.079
Mg_485	-230.195
Mg_3556	-230.396
Mg_7691	-230.423
Mg_3679	-230.434
Mg_3852	-230.621
Mg_2993	-230.707
Be_2962	-230.852
Mg_6601	-231.469
Mg_3045	-231.897
Mg_5847	-232
Mg_8315	-232.228
Mg_920	-232.255
Mg_1070	-232.272
Mg_1337	-232.487
Be_7319	-232.804
Mg_1801	-233.145
Mg_4984	-233.213
Mg_1093	-233.351
Mg_1878	-233.452
Mg_7694	-233.547
Mg_3193	-234.188
Mg_1405	-234.464
Mg_6556	-234.943
Be_3113	-235.394
Mg_6248	-235.686
Mg_1925	-236.019
Be_3099	-236.571
Mg_1639	-236.754
Mg_8158	-236.76
Be_2303	-236.789
Mg_4629	-236.859
Mg_447	-236.898
Mg_1781	-237.372
Mg_8333	-237.583
Be_7494	-237.791
Mg_605	-238.194
Mg_1676	-238.322
Be_3092	-238.536
Mg_766	-238.858
Mg_8120	-238.986
Mg_8110	-239.082
Be_911	-239.117
Mg_5415	-239.708
Be_6860	-239.754
Be_6855	-239.985
Mg_459	-240.425
Mg_1754	-240.511
Mg_8141	-241.383
Mg_5654	-241.505
Mg_7188	-241.722
Mg_3474	-242.261
Be_6755	-242.496
Be_6664	-242.624
Mg_3874	-242.912
Mg_772	-243.784
Mg_3268	-243.942
Mg_4173	-244.112
Be_7323	-244.901
Be_7907	-244.906
Be_7910	-244.928
Be_4345	-245.045
Mg_5908	-245.674
Mg_6368	-245.832
Mg_463	-246.392
Be_7134	-246.45
Be_7334	-247.178
Mg_1689	-247.234
Be_905	-247.444
Mg_1875	-247.459
Mg_2340	-247.587
Mg_1898	-247.8
Mg_4912	-249.125
Be_6859	-249.313
Be_2359	-249.423
Mg_3933	-249.632
Be_3017	-249.847
Mg_1953	-250.209
Mg_1124	-250.656
Be_8747	-251.206
Mg_4754	-251.338
Mg_1757	-251.877
Be_4395	-252.617
Mg_831	-253.174
Be_7318	-253.184
Be_2967	-253.222
Mg_3805	-253.525
Mg_1836	-254.063
Be_7301	-254.55
Mg_8026	-255.057
Mg_1333	-255.382
Mg_2048	-255.657
Be_2807	-255.98
Be_2126	-256.38
Be_7253	-257.138
Be_2223	-257.269
Mg_8091	-257.641
Mg_3921	-258.131
Be_7227	-258.219
Mg_4288	-258.357
Mg_4996	-258.389
Be_6313	-258.632
Be_50	-258.819
Be_7248	-259.006
Be_2515	-259.344
Be_6950	-260.113
Mg_4113	-260.64
Be_2978	-261.491
Be_8237	-261.541
Be_7244	-261.993
Mg_8076	-262.097
Be_7657	-263.029
Be_6051	-263.176
Be_8762	-263.325
Mg_6383	-263.999
Be_7046	-264.708
Be_8525	-264.804
Be_6002	-265.994
Be_6043	-266.993
Be_7231	-267.28
Be_6150	-267.496
Be_2269	-267.798
Be_3594	-268.157
Be_5770	-269.019
Be_3645	-269.924
Be_3418	-270.663
Be_7656	-270.832
Be_4343	-271.304
Be_6637	-272.19
Be_942	-272.471
Be_2287	-272.827
Be_7251	-274.536
Be_6635	-274.616
Be_6271	-275.275
Be_6853	-275.933
Be_6295	-275.957
Be_7048	-275.957
Be_6621	-276.296
Be_6629	-276.326
Be_2253	-276.993
Mg_4536	-277.282
Be_6679	-277.372
Be_6813	-277.616
Mg_8047	-278.35
Be_6617	-278.696
Be_7141	-279.922
Be_6640	-280.017
Be_681	-280.042
Be_3741	-280.447
Be_1426	-280.764
Be_6539	-280.86
Be_7234	-280.95
Mg_8302	-281.57
Be_7035	-281.607
Mg_4094	-281.644
Be_6506	-281.848
Mg_1719	-281.852
Be_7343	-282.286
Be_7674	-282.304
Mg_589	-282.395
Be_2587	-282.671
Be_6847	-283.109
Be_176	-283.406
Be_7333	-283.625
Be_2700	-283.994
Be_7055	-285.911
Be_6534	-286.128
Be_6331	-286.256
Be_3709	-286.278
Be_987	-286.37
Be_894	-286.534
Be_6021	-286.878
Be_6027	-287.272
Be_45	-287.468
Be_6957	-287.549
Be_3775	-287.582
Be_8531	-289.04
Be_6942	-289.205
Be_3458	-289.225
Be_5987	-289.47
Be_84	-289.494
Be_2346	-289.803
Be_7085	-290.315
Be_6214	-291.271
Be_3189	-291.357
Be_417	-291.385
Be_8768	-291.852
Be_7756	-292.262
Be_2659	-292.545
Be_120	-292.55
Be_1046	-292.724
Be_218	-292.854
Be_7858	-292.974
Be_2789	-293.355
Be_6008	-293.407
Be_5981	-293.46
Be_103	-293.651
Be_8534	-293.849
Be_1423	-294.137
Be_620	-294.898
Be_6913	-294.923
Be_2585	-294.951
Be_7289	-295.176
Be_2319	-295.772
Be_6218	-295.783
Be_8471	-295.948
Be_1474	-296.213
Be_5262	-296.592
Be_7788	-296.818
Be_158	-297.007
Be_5862	-297.018
Be_2642	-297.206
Be_6744	-297.455
Be_3982	-297.572
Be_7284	-297.794
Be_5916	-297.803
Be_3742	-297.862
Be_2996	-297.878
Be_6024	-298.157
Be_7218	-298.476
Be_186	-298.786
Be_1272	-299.075
Be_931	-299.177
Be_2726	-299.225
Be_2322	-299.575
Be_1801	-299.639
Be_3019	-299.765
Be_2542	-300.555
Be_2616	-300.572
Be_167	-300.646
Be_3716	-301.065
Be_8553	-301.166
Be_563	-301.193
Be_3927	-301.533
Be_1417	-301.795
Be_5066	-302.706
Be_562	-303.23
Be_5298	-303.454
Be_6762	-303.49
Be_815	-303.507
Be_6937	-304.102
Be_5072	-304.265
Be_6206	-304.273
Be_1397	-304.814
Be_2606	-304.883
Be_554	-304.984
Be_7172	-305.028
Be_7091	-305.162
Be_1213	-305.262
Be_1878	-305.362
Be_1009	-305.444
Be_765	-305.469
Be_5905	-305.531
Be_1781	-305.599
Be_4207	-305.921
Be_2677	-305.967
Be_875	-306.095
Be_3813	-306.46
Be_7626	-306.506
Be_233	-306.509
Be_72	-306.698
Be_922	-306.901
Be_6304	-307.058
Be_8343	-307.107
Be_494	-307.173
Be_2533	-307.318
Be_7142	-307.579
Be_2690	-307.582
Be_3247	-307.998
Be_8197	-308.246
Be_5198	-308.307
Be_5052	-308.331
Be_58	-308.521
Be_5982	-309.213
Be_3056	-309.254
Be_242	-309.364
Be_3693	-309.969
Be_5859	-310.327
Be_1836	-310.544
Be_252	-310.8
Be_3004	-310.967
Be_3213	-311.064
Be_3637	-311.446
Be_8563	-311.613
Be_4246	-311.692
Be_7243	-311.842
Be_5608	-311.936
Be_5721	-312.332
Be_5498	-312.46
Be_3904	-312.51
Be_3240	-312.518
Be_1676	-312.782
Be_8190	-312.809
Be_6905	-313.084
Be_7506	-313.552
Be_5090	-314.97
Be_459	-315.591
Be_1689	-316.361
Be_7072	-317.209
Be_763	-317.529
Be_473	-317.619
Be_171	-317.899
Be_1442	-318.109
Be_3089	-318.873
Be_5456	-320.032
Be_2119	-320.214
Be_7053	-320.588
Be_4810	-321.17
Be_7275	-321.202
Be_4887	-321.982
Be_3951	-322.096
Be_8223	-322.386
Be_7861	-322.56
Be_550	-322.631
Be_4842	-322.703
Be_1509	-323.156
Be_6660	-323.387
Be_4811	-324.076
Be_4963	-324.248
Be_3143	-324.3
Be_2144	-324.552
Be_5876	-325.041
Be_5941	-325.052
Be_553	-325.114
Be_229	-325.326
Be_4156	-325.557
Be_7764	-325.643
Be_1611	-325.73
Be_327	-325.862
Be_5878	-325.881
Be_4145	-326.095
Be_2566	-326.5
Be_4700	-326.918
Be_416	-327.058
Be_3452	-327.09
Be_4921	-327.162
Be_3863	-327.915
Be_116	-328.51
Be_6041	-329.027
Be_7159	-329.241
Be_7570	-329.97
Be_2925	-330.067
Be_8737	-330.346
Be_8535	-330.405
Be_3824	-330.913
Be_6305	-331.124
Be_7714	-331.884
Be_6654	-331.905
Be_7687	-332.584
Be_7844	-333.229
Be_1495	-333.296
Be_8214	-333.401
Be_4996	-333.657
Be_2539	-334.998
Be_6368	-335.149
Be_8072	-335.287
Be_2013	-336.251
Be_4216	-336.83
Be_4421	-337.083
Be_994	-337.886
Be_4896	-339.396
Be_5889	-339.408
Be_4919	-341.162
Be_6933	-341.956
Be_2121	-342.592
Be_5293	-342.727
Be_2351	-342.993
Be_661	-343.063
Be_3805	-343.527
Be_6829	-343.862
Be_412	-344.059
Be_4173	-344.101
Be_7891	-345.046
Be_3679	-345.234
Be_6017	-345.413
Be_7566	-347.587
Be_4317	-347.839
Be_155	-348.261
Be_1196	-348.775
Be_131	-349.522
Be_7847	-349.558
Be_640	-350.333
Be_7357	-350.806
Be_921	-351.335
Be_3071	-351.342
Be_8069	-351.917
Be_2325	-351.955
Be_6700	-352.407
Be_7394	-352.723
Be_5847	-354.312
Be_6486	-354.532
Be_6803	-354.831
Be_3890	-355.122
Be_5818	-355.254
Be_7892	-355.458
Be_5175	-355.557
Be_7694	-355.638
Be_7003	-355.712
Be_4984	-355.856
Be_7408	-355.869
Be_6601	-355.946
Be_3479	-355.965
Be_8274	-356.622
Be_2408	-356.982
Be_447	-357.284
Be_8333	-357.598
Be_7868	-357.71
Be_1757	-357.762
Be_796	-358.045
Be_7188	-358.324
Be_2455	-359.162
Be_920	-359.503
Be_485	-360.225
Be_6334	-360.489
Be_866	-360.81
Be_8161	-360.929
Be_4609	-361.702
Be_3852	-361.929
Be_4602	-362.028
Be_3491	-362.162
Be_6515	-362.266
Be_8492	-362.301
Be_804	-362.506
Be_1096	-362.864
Be_605	-363.136
Be_3556	-363.222
Be_6067	-363.396
Be_1959	-363.502
Be_8073	-364.212
Be_75	-364.366
Be_1337	-365.261
Be_794	-366.273
Be_3474	-366.538
Be_1925	-366.692
Be_1093	-366.696
Be_2993	-367.266
Be_8158	-368.04
Be_3045	-368.635
Be_1070	-368.736
Be_3175	-369.042
Be_3874	-369.712
Be_6717	-370.523
Be_3225	-370.783
Be_4629	-370.837
Be_6248	-371.086
Be_8315	-372.501
Be_7691	-372.689
Be_3857	-373.598
Be_1148	-375.529
Be_1754	-377.303
Be_1124	-378.152
Be_8120	-378.69
Be_1996	-378.799
Be_3268	-378.855
[truncated: 30 more rows]

## Sheet: ML_Prediction
file	BE_eV
Mg_8670	-12.684
Mg_8625	-12.4621
Mg_8669	-12.3253
Mg_8627	-12.2711
Mg_8633	-12.1818
Mg_8077	-12.1507
Mg_8407	-12.0887
Mg_4498	-12.0066
Mg_1742	-12.001
Mg_1817	-11.972
Mg_4517	-11.9186
Mg_8634	-11.908
Mg_1152	-11.9063
Mg_1767	-11.8987
Mg_1717	-11.8876
Mg_8318	-11.8132
Mg_4613	-11.8131
Mg_1308	-11.8037
Mg_4574	-11.8027
Mg_8176	-11.7987
Mg_8643	-11.7937
Mg_8657	-11.7668
Mg_8663	-11.7655
Mg_3545	-11.7543
Mg_6600	-11.7361
Mg_8153	-11.705
Mg_8651	-11.7033
Mg_670	-11.6859
Mg_8270	-11.6651
Mg_1792	-11.6499
Mg_4441	-11.6495
Mg_3520	-11.6306
Mg_4023	-11.6244
Mg_6567	-11.623
Mg_8122	-11.6005
Mg_1592	-11.6004
Mg_8659	-11.5845
Mg_4555	-11.5835
Mg_8107	-11.5799
Mg_6592	-11.5791
Mg_1741	-11.5783
Mg_1126	-11.5768
Mg_8138	-11.5744
Mg_1642	-11.5682
Mg_1619	-11.5516
Mg_1667	-11.5403
Mg_6059	-11.5372
Mg_1178	-11.5336
Mg_8631	-11.5315
Mg_2230	-11.5302
Mg_1616	-11.5268
Mg_1816	-11.5053
Mg_4594	-11.5051
Mg_6016	-11.4979
Mg_8092	-11.4886
Mg_1692	-11.4841
Mg_8637	-11.463
Mg_8645	-11.4481
Mg_8630	-11.4412
Mg_6090	-11.4412
Mg_8665	-11.4373
Mg_1716	-11.4154
Mg_1074	-11.4048
Mg_6583	-11.4042
Mg_1868	-11.4019
Mg_3570	-11.3915
Mg_1867	-11.3907
Mg_1620	-11.3748
Mg_4039	-11.3745
Mg_1617	-11.3697
Mg_8671	-11.3629
Mg_8062	-11.3575
Mg_1694	-11.3558
Mg_4417	-11.3473
Mg_1820	-11.3408
Mg_4005	-11.3212
Mg_4011	-11.3202
Mg_1744	-11.3193
Mg_4105	-11.3109
Mg_6575	-11.3107
Mg_1766	-11.3073
Mg_1720	-11.2987
Mg_1310	-11.2939
Mg_4479	-11.2778
Mg_4106	-11.2746
Mg_4093	-11.2697
Mg_8632	-11.265
Mg_6551	-11.2627
Mg_1870	-11.2615
Mg_8317	-11.2606
Mg_4573	-11.2487
Mg_1307	-11.2486
Mg_7406	-11.248
Mg_1745	-11.241
Mg_4104	-11.2384
Mg_4460	-11.2358
Mg_593	-11.2324
Mg_8622	-11.2306
Mg_4138	-11.2269
Mg_6697	-11.2264
Mg_6280	-11.2224
Mg_8646	-11.2174
Mg_4116	-11.2111
Mg_1842	-11.1987
Mg_4535	-11.1981
Mg_6040	-11.1956
Mg_1154	-11.1953
Mg_4277	-11.1946
Mg_6559	-11.193
Mg_4006	-11.1879
Mg_6614	-11.1777
Mg_1794	-11.1772
Mg_4019	-11.1746
Mg_4310	-11.1692
Mg_4038	-11.164
Mg_4497	-11.1637
Mg_6707	-11.1621
Mg_6659	-11.1614
Mg_1695	-11.1589
Mg_1871	-11.1539
Mg_4440	-11.1435
Mg_4266	-11.1412
Mg_4040	-11.1402
Mg_4012	-11.1352
Mg_8615	-11.1297
Mg_8046	-11.1233
Mg_4195	-11.1185
Mg_7352	-11.1124
Mg_8626	-11.0936
Mg_8579	-11.0843
Mg_1311	-11.079
Mg_4139	-11.0769
Mg_7995	-11.0763
Mg_4267	-11.0648
Mg_3275	-11.0548
Mg_8647	-11.0519
Mg_7950	-11.0431
Mg_1955	-11.0337
Mg_1641	-11.0287
Mg_4311	-11.0278
Mg_8382	-11.0143
Mg_8137	-10.99
Mg_8152	-10.9899
Mg_8672	-10.9839
Mg_8603	-10.9833
Mg_4177	-10.9806
Mg_6599	-10.9732
Mg_7298	-10.967
Mg_4102	-10.9668
Mg_4221	-10.9634
Mg_6336	-10.9605
Mg_3522	-10.9496
Mg_8628	-10.9463
Mg_8666	-10.9422
Mg_4020	-10.9421
Mg_4183	-10.9409
Mg_7388	-10.9352
Mg_8609	-10.9344
Mg_8577	-10.925
Mg_1644	-10.9224
Mg_4232	-10.9207
Mg_1128	-10.9186
Mg_1155	-10.918
Mg_4276	-10.9106
Mg_4127	-10.9098
Mg_3495	-10.9084
Mg_4124	-10.9041
Mg_4091	-10.9033
Mg_4211	-10.9033
Mg_3572	-10.9031
Mg_8366	-10.8982
Mg_5290	-10.8982
Mg_1999	-10.8979
Mg_6058	-10.8881
Mg_8667	-10.8876
Mg_8106	-10.882
Mg_4212	-10.8788
Mg_4210	-10.8742
Mg_4128	-10.8739
Mg_4234	-10.8672
Mg_4278	-10.8659
Mg_8595	-10.8653
Mg_4222	-10.8578
Mg_8121	-10.8521
Mg_4048	-10.8509
Mg_4612	-10.8503
Mg_4593	-10.8499
Mg_1795	-10.8416
Mg_6310	-10.8368
Mg_8639	-10.8361
Mg_4137	-10.8285
Mg_6591	-10.8269
Mg_1177	-10.824
Mg_4062	-10.8227
Mg_2482	-10.8226
Mg_8301	-10.8166
Mg_2025	-10.8162
Mg_1669	-10.8124
Mg_4083	-10.8096
Mg_8269	-10.8088
Mg_2031	-10.8083
Mg_4289	-10.8052
Mg_3223	-10.8043
Mg_1994	-10.803
Mg_4554	-10.8012
Mg_5238	-10.7986
Mg_2085	-10.798
Mg_5145	-10.7948
Mg_4793	-10.7936
Mg_3314	-10.7921
Mg_1645	-10.7921
Mg_8597	-10.7915
Mg_1749	-10.79
Mg_5022	-10.7871
Mg_3084	-10.7852
Mg_5938	-10.7813
Mg_1958	-10.7807
Mg_2020	-10.7805
Mg_5251	-10.7786
Mg_4117	-10.7784
Mg_2035	-10.7783
Mg_4036	-10.7779
Mg_4135	-10.776
Mg_5977	-10.7685
Mg_4220	-10.7677
Mg_7920	-10.7675
Mg_4218	-10.7662
Mg_3519	-10.7647
Mg_1666	-10.7646
Mg_2070	-10.7632
Mg_879	-10.7632
Mg_8286	-10.7616
Mg_1125	-10.759
Mg_8641	-10.7549
Mg_354	-10.7515
Mg_1996	-10.7473
Mg_1670	-10.746
Mg_1129	-10.7441
Mg_4108	-10.7419
Mg_3569	-10.7417
Mg_1824	-10.7416
Mg_4095	-10.7394
Mg_4072	-10.7382
Mg_3544	-10.7334
Mg_1940	-10.7332
Mg_3523	-10.7327
Mg_8406	-10.7317
Mg_1180	-10.7303
Mg_7505	-10.7296
Mg_2046	-10.724
Mg_4115	-10.7176
Mg_3182	-10.715
Mg_8350	-10.7135
Mg_587	-10.7124
Mg_2072	-10.7095
Mg_2446	-10.7078
Mg_4518	-10.705
Mg_8589	-10.7049
Mg_2005	-10.7024
Mg_1954	-10.7002
Mg_4832	-10.6977
Mg_1076	-10.6958
Mg_4478	-10.6952
Mg_6069	-10.6917
Mg_4459	-10.6874
Mg_3249	-10.6844
Mg_4265	-10.6824
Mg_2021	-10.6804
Mg_2033	-10.6801
Mg_1181	-10.6782
Mg_4534	-10.677
Mg_2087	-10.6759
Mg_1951	-10.6752
Mg_1761	-10.6746
Mg_2007	-10.6735
Mg_4046	-10.6706
Mg_7980	-10.6705
Mg_292	-10.6672
Mg_4050	-10.6668
Mg_4533	-10.6616
Mg_1621	-10.6614
Mg_3470	-10.6607
Mg_5974	-10.6582
Mg_4136	-10.657
Mg_1624	-10.6559
Mg_5519	-10.6546
Mg_1746	-10.6538
Mg_1838	-10.6536
Mg_6079	-10.6535
Mg_1740	-10.6531
Mg_4097	-10.6519
Mg_882	-10.6513
Mg_5935	-10.6508
Mg_8621	-10.647
Mg_5603	-10.6438
Mg_7965	-10.6432
Mg_2059	-10.6413
Mg_4192	-10.6411
Mg_1077	-10.638
Mg_4244	-10.634
Mg_5744	-10.6334
Mg_2074	-10.633
Mg_4929	-10.6325
Mg_3262	-10.6324
Mg_4970	-10.6322
Mg_4309	-10.6303
Mg_4080	-10.6296
Mg_301	-10.6294
Mg_1638	-10.628
Mg_4572	-10.6261
Mg_1832	-10.6261
Mg_5748	-10.625
Mg_4285	-10.6244
Mg_4298	-10.6239
Mg_4230	-10.6193
Mg_1815	-10.6192
Mg_4780	-10.6161
Mg_1942	-10.6155
Mg_5374	-10.6145
Mg_3288	-10.6111
Mg_4590	-10.6098
Mg_1490	-10.6097
Mg_2430	-10.6066
Mg_2044	-10.6044
Mg_4300	-10.6031
Mg_1941	-10.6025
Mg_5247	-10.6015
Mg_4245	-10.6015
Mg_1914	-10.601
Mg_1763	-10.5986
Mg_1918	-10.5979
Mg_1732	-10.5972
Mg_4060	-10.5966
Mg_2018	-10.5954
Mg_2009	-10.5951
Mg_1970	-10.5943
Mg_291	-10.5939
Mg_364	-10.5916
Mg_1818	-10.591
Mg_1591	-10.5898
Mg_4007	-10.5893
Mg_4014	-10.5876
Mg_4208	-10.585
Mg_6582	-10.5838
Mg_4142	-10.5832
Mg_4233	-10.5818
Mg_1632	-10.5814
Mg_2061	-10.5807
Mg_5467	-10.5795
Mg_6566	-10.5768
Mg_1986	-10.5759
Mg_4003	-10.5716
Mg_8061	-10.5698
Mg_5705	-10.569
Mg_4263	-10.5661
Mg_1306	-10.565
Mg_1821	-10.5645
Mg_4913	-10.561
Mg_3547	-10.5587
Mg_1636	-10.5563
Mg_5006	-10.5555
Mg_2090	-10.555
Mg_4016	-10.5526
Mg_1594	-10.5519
Mg_8598	-10.5511
Mg_5912	-10.551
Mg_1626	-10.5503
Mg_8661	-10.5501
Mg_1159	-10.5495
Mg_5925	-10.548
Mg_5709	-10.5473
Mg_4103	-10.5469
Mg_4515	-10.5427
Mg_6727	-10.5414
Mg_5199	-10.5376
Mg_4575	-10.5364
Mg_5886	-10.5355
Mg_4925	-10.5344
Mg_639	-10.5344
Mg_1323	-10.5335
Mg_3469	-10.5329
Mg_1759	-10.5323
Mg_7370	-10.531
Mg_2034	-10.5304
Mg_548	-10.5298
Mg_3310	-10.5286
Mg_1073	-10.5285
Mg_3258	-10.5285
Mg_8151	-10.5281
Mg_518	-10.5274
Mg_8654	-10.5259
Mg_1334	-10.5257
Mg_760	-10.5232
Mg_8653	-10.523
Mg_1743	-10.5228
Mg_757	-10.5219
Mg_5221	-10.5205
Mg_5032	-10.5187
Mg_3667	-10.518
Mg_4126	-10.5127
Mg_1148	-10.512
Mg_4296	-10.5108
Mg_2052	-10.5106
Mg_4061	-10.5097
Mg_4280	-10.5092
Mg_4141	-10.5081
Mg_846	-10.5075
Mg_345	-10.5067
Mg_3054	-10.506
Mg_1690	-10.5053
Mg_1774	-10.5041
Mg_1968	-10.503
Mg_303	-10.5025
Mg_343	-10.5017
Mg_2060	-10.5016
Mg_6558	-10.499
Mg_3965	-10.4959
Mg_1799	-10.4949
Mg_5480	-10.4941
Mg_6550	-10.494
Mg_6574	-10.4922
Mg_1751	-10.4917
Mg_4143	-10.4916
Mg_3573	-10.4894
Mg_597	-10.4893
Mg_4457	-10.4861
Mg_8075	-10.486
Mg_1924	-10.486
Mg_4214	-10.4851
Mg_313	-10.485
Mg_293	-10.484
Mg_3527	-10.4838
Mg_5035	-10.4827
Mg_5829	-10.4787
Mg_1946	-10.4783
Mg_1995	-10.4778
Mg_1979	-10.4751
Mg_5264	-10.4743
Mg_311	-10.4708
Mg_4109	-10.4646
Mg_7387	-10.4644
Mg_7405	-10.4643
Mg_6747	-10.4639
Mg_1960	-10.4637
Mg_3548	-10.4624
Mg_517	-10.4617
Mg_302	-10.4614
Mg_4439	-10.4614
Mg_4741	-10.4612
Mg_5225	-10.4603
Mg_341	-10.4599
Mg_4588	-10.4584
Mg_3549	-10.4572
Mg_674	-10.4568
Mg_3165	-10.4561
Mg_5696	-10.4556
Mg_1966	-10.4539
Mg_1843	-10.4509
Mg_4287	-10.4506
Mg_353	-10.4495
Mg_2992	-10.4481
Mg_5845	-10.4462
Mg_1133	-10.4461
Mg_5616	-10.446
Mg_4186	-10.4449
Mg_5692	-10.4448
Mg_2485	-10.4443
Mg_3219	-10.4442
Mg_3271	-10.444
Mg_6068	-10.4438
Mg_299	-10.4434
Mg_4073	-10.443
Mg_8206	-10.4426
Mg_8585	-10.442
Mg_4683	-10.4412
Mg_4687	-10.4407
Mg_384	-10.4399
Mg_3497	-10.4395
Mg_2193	-10.4385
Mg_3543	-10.4365
Mg_8300	-10.4344
Mg_1992	-10.4341
Mg_2091	-10.4336
Mg_4084	-10.4325
Mg_1309	-10.4312
Mg_2083	-10.4309
Mg_5387	-10.43
Mg_289	-10.4299
Mg_5045	-10.4298
Mg_8123	-10.4283
Mg_5951	-10.4282
Mg_4119	-10.4272
Mg_5657	-10.4266
Mg_508	-10.4218
Mg_1618	-10.4203
Mg_8655	-10.4201
Mg_4255	-10.4201
Mg_8045	-10.4194
Mg_1149	-10.4193
Mg_3932	-10.4188
Mg_4299	-10.4183
Mg_5007	-10.4172
Mg_7935	-10.414
Mg_1938	-10.4092
Mg_2032	-10.4089
Mg_1156	-10.4076
Mg_4004	-10.4065
Mg_355	-10.4062
Mg_5048	-10.4058
Mg_1835	-10.4042
Mg_2073	-10.4039
Mg_7351	-10.4032
Mg_1674	-10.4029
Mg_5260	-10.4027
Mg_374	-10.4022
Mg_4053	-10.3992
Mg_4992	-10.3988
Mg_1768	-10.3972
Mg_8586	-10.3962
Mg_4054	-10.3953
Mg_1762	-10.3938
Mg_4243	-10.3929
Mg_1304	-10.3926
Mg_3876	-10.3908
Mg_4082	-10.39
Mg_1329	-10.3891
Mg_5428	-10.3885
Mg_1921	-10.388
Mg_3923	-10.3866
Mg_1883	-10.3865
Mg_3301	-10.3858
Mg_3521	-10.3857
Mg_6598	-10.3846
Mg_8222	-10.3826
Mg_4499	-10.3819
Mg_315	-10.3792
Mg_2047	-10.3775
Mg_5883	-10.3764
Mg_1912	-10.3752
Mg_2394	-10.375
Mg_858	-10.3749
Mg_1713	-10.3748
Mg_1850	-10.3731
Mg_834	-10.3726
Mg_6126	-10.3722
Mg_455	-10.3715
Mg_8629	-10.3714
Mg_3044	-10.3696
Mg_3473	-10.3677
Mg_5277	-10.3672
Mg_2077	-10.3663
Mg_6352	-10.3654
Mg_1634	-10.3639
Mg_4307	-10.363
Mg_4763	-10.3603
Mg_8316	-10.3601
Mg_4776	-10.3595
Mg_1724	-10.3595
Mg_5212	-10.3595
Mg_5842	-10.3593
Mg_5948	-10.3571
Mg_5424	-10.3566
Mg_4098	-10.3564
Mg_2057	-10.3559
Mg_1889	-10.355
Mg_5683	-10.3536
Mg_1327	-10.3533
Mg_5018	-10.3523
Mg_1788	-10.3506
Mg_4442	-10.3494
Mg_3839	-10.3493
Mg_2135	-10.3481
Mg_1869	-10.3447
Mg_4967	-10.3434
Mg_2086	-10.3423
Mg_1714	-10.3422
Mg_4527	-10.3419
Mg_1760	-10.3392
Mg_6764	-10.3376
Mg_8174	-10.3373
Mg_1623	-10.334
Mg_8660	-10.3325
Mg_4589	-10.3323
Mg_1819	-10.3318
Mg_351	-10.3305
Mg_6136	-10.3296
Mg_4446	-10.3296
Mg_1911	-10.3294
Mg_1752	-10.3274
Mg_4022	-10.3269
Mg_2129	-10.3266
Mg_8078	-10.3265
Mg_1305	-10.3246
Mg_1872	-10.3244
Mg_363	-10.324
Mg_5860	-10.3222
Mg_3270	-10.3221
Mg_5463	-10.3202
Mg_870	-10.3189
Mg_4058	-10.3187
Mg_1736	-10.3185
Mg_2459	-10.318
Mg_1887	-10.3154
Mg_4525	-10.3151
Mg_4957	-10.3148
Mg_5718	-10.3147
Mg_4806	-10.3145
Mg_1150	-10.3143
Mg_3272	-10.3132
Mg_1904	-10.3127
Mg_1161	-10.312
Mg_4453	-10.3108
Mg_8582	-10.307
Mg_1615	-10.3064
Mg_4225	-10.3063
Mg_4125	-10.3062
Mg_385	-10.306
Mg_4923	-10.3053
Mg_3955	-10.3043
Mg_2234	-10.3042
Mg_456	-10.3041
Mg_6581	-10.3041
Mg_4944	-10.3035
Mg_4552	-10.3031
Mg_5057	-10.3022
Mg_4254	-10.3012
Mg_5735	-10.3002
Mg_1701	-10.2984
Mg_6030	-10.2978
Mg_4013	-10.2978
Mg_3944	-10.2973
Mg_5285	-10.2955
Mg_4069	-10.2946
Mg_1952	-10.2941
Mg_4584	-10.293
Mg_2026	-10.2913
Mg_1776	-10.2907
Mg_466	-10.2902
Mg_4767	-10.2892
Mg_5169	-10.2873
Mg_4275	-10.2868
Mg_4044	-10.2863
Mg_4537	-10.2862
Mg_383	-10.2855
Mg_1325	-10.2842
Mg_1173	-10.2809
Mg_1185	-10.2808
Mg_3245	-10.2788
Mg_477	-10.2784
Mg_1158	-10.2782
Mg_1769	-10.2763
Mg_3866	-10.2755
Mg_6706	-10.2744
Mg_5151	-10.2744
Mg_3477	-10.2743
Mg_2417	-10.2742
Mg_1834	-10.2739
Mg_668	-10.2728
Mg_1922	-10.2727
Mg_4914	-10.2724
Mg_7865	-10.2718
Mg_6696	-10.2714
Mg_2350	-10.2701
Mg_273	-10.2698
Mg_2456	-10.2683
Mg_4178	-10.2682
Mg_1909	-10.2678
Mg_1748	-10.2676
Mg_1765	-10.2671
Mg_4092	-10.2648
Mg_4788	-10.2646
Mg_4737	-10.2643
Mg_1721	-10.2637
Mg_1826	-10.2625
Mg_371	-10.2608
Mg_3566	-10.2596
Mg_678	-10.2586
Mg_1172	-10.2576
Mg_1169	-10.2575
Mg_1726	-10.2574
Mg_2420	-10.2574
Mg_8611	-10.257
Mg_1920	-10.2568
Mg_3919	-10.2561
Mg_4176	-10.2554
Mg_519	-10.2549
Mg_5493	-10.254
Mg_4819	-10.2537
Mg_5489	-10.2525
Mg_465	-10.2505
Mg_344	-10.2505
Mg_1127	-10.2491
Mg_5679	-10.2482
Mg_4081	-10.248
Mg_1975	-10.2475
Mg_3922	-10.2458
Mg_5383	-10.2447
Mg_1993	-10.2438
Mg_8599	-10.2431
Mg_4512	-10.2431
Mg_8319	-10.243
Mg_4980	-10.2412
Mg_1171	-10.2394
Mg_8578	-10.2376
Mg_4001	-10.2345
Mg_5140	-10.2344
Mg_2041	-10.2338
Mg_4237	-10.2335
Mg_4966	-10.2332
Mg_4510	-10.2314
Mg_8105	-10.2305
Mg_1141	-10.2299
Mg_783	-10.2282
Mg_1886	-10.2267
Mg_1595	-10.2262
Mg_382	-10.2254
Mg_4270	-10.2254
Mg_509	-10.2247
Mg_3284	-10.2244
Mg_1877	-10.2241
Mg_3878	-10.2233
Mg_1837	-10.2227
Mg_3551	-10.2222
Mg_5059	-10.2212
Mg_1755	-10.2202
Mg_1164	-10.219
Mg_4940	-10.219
Mg_4052	-10.2189
Mg_4114	-10.2178
Mg_1813	-10.2176
Mg_4021	-10.2172
Mg_5704	-10.2164
Mg_4066	-10.2154
Mg_538	-10.2149
Mg_361	-10.2143
Mg_4185	-10.2143
Mg_5020	-10.2133
Mg_3197	-10.2131
Mg_6360	-10.2131
Mg_1756	-10.2131
Mg_4524	-10.213
Mg_375	-10.2129
Mg_373	-10.2121
Mg_4256	-10.2113
Mg_4556	-10.2107
Mg_4591	-10.209
Mg_8618	-10.2077
Mg_1791	-10.2075
Mg_1939	-10.2064
Mg_1336	-10.2064
Mg_5019	-10.2045
Mg_819	-10.2042
Mg_1927	-10.2037
Mg_3564	-10.2037
Mg_5003	-10.2034
Mg_8574	-10.2032
Mg_8550	-10.202
Mg_1784	-10.2005
Mg_3552	-10.1996
Mg_3967	-10.1979
Mg_5599	-10.1978
Mg_676	-10.1971
Mg_1885	-10.197
Mg_5005	-10.1963
Mg_6436	-10.1962
Mg_8745	-10.1945
Mg_365	-10.1923
Mg_4241	-10.1921
Mg_4519	-10.1911
Mg_5899	-10.1907
Mg_1807	-10.1905
Mg_3297	-10.1904
Mg_6335	-10.1902
Mg_1730	-10.1899
Mg_8011	-10.1891
Mg_1627	-10.189
Mg_1961	-10.1882
Mg_4454	-10.1872
Mg_4682	-10.1867
Mg_5506	-10.1867
Mg_1932	-10.186
Mg_1830	-10.1859
Mg_3930	-10.1857
Mg_4964	-10.1854
Mg_5141	-10.1852
Mg_4033	-10.185
Mg_5016	-10.1844
Mg_3472	-10.1842
Mg_4024	-10.1841
Mg_5450	-10.1836
Mg_5476	-10.1833
Mg_6568	-10.1829
Mg_1709	-10.1819
Mg_5598	-10.1816
Mg_3002	-10.1805
Mg_4086	-10.1803
Mg_8048	-10.1803
Mg_4037	-10.1796
Mg_4496	-10.179
Mg_4541	-10.1772
Mg_5061	-10.1769
Mg_8591	-10.1768
Mg_8741	-10.1763
Mg_2093	-10.1729
Mg_1753	-10.1721
Mg_1764	-10.172
Mg_1967	-10.1699
Mg_4282	-10.1685
Mg_7277	-10.1684
Mg_3535	-10.168
Mg_5502	-10.1669
Mg_6114	-10.1665
Mg_4480	-10.1665
Mg_7478	-10.1661
Mg_2012	-10.1656
Mg_1628	-10.1634
Mg_4252	-10.1632
Mg_5287	-10.1626
Mg_4175	-10.1625
Mg_4191	-10.1623
Mg_4695	-10.1622
Mg_4585	-10.1621
Mg_1981	-10.1609
Mg_467	-10.1607
Mg_7442	-10.1605
Mg_4697	-10.1571
Mg_4581	-10.1564
Mg_1388	-10.1553
Mg_5155	-10.1531
Mg_4582	-10.1523
Mg_4528	-10.1519
Mg_8268	-10.151
Mg_8613	-10.1509
Mg_3966	-10.1489
Mg_453	-10.1488
Mg_1649	-10.1487
Mg_5973	-10.1483
Mg_2066	-10.148
Mg_4308	-10.1479
Mg_4059	-10.1473
Mg_8484	-10.1472
Mg_5921	-10.1457
Mg_324	-10.1456
Mg_5142	-10.1456
Mg_1671	-10.145
Mg_3554	-10.1448
Mg_457	-10.1443
Mg_547	-10.1441
Mg_3886	-10.1429
Mg_1698	-10.1427
Mg_5153	-10.1418
Mg_6131	-10.1409
Mg_1693	-10.1408
Mg_3943	-10.1407
Mg_1314	-10.14
Mg_5854	-10.1398
Mg_1078	-10.1392
Mg_3865	-10.1385
Mg_8607	-10.1383
Mg_6642	-10.1382
Mg_5196	-10.1375
Mg_3888	-10.1373
Mg_4815	-10.1365
Mg_3877	-10.1356
Mg_4018	-10.1356
Mg_4637	-10.1341
Mg_5234	-10.1336
Mg_4452	-10.1334
Mg_1081	-10.1334
Mg_1734	-10.1325
Mg_5514	-10.132
Mg_8584	-10.1315
Mg_4314	-10.1315
Mg_4942	-10.1305
Mg_4531	-10.1299
Mg_1170	-10.1287
Mg_334	-10.1274
Mg_843	-10.1272
Mg_2078	-10.1269
Mg_1903	-10.1264
Mg_5248	-10.1254
Mg_1796	-10.1248
Mg_1706	-10.1237
Mg_4597	-10.1232
Mg_4990	-10.1217
Mg_4583	-10.1198
Mg_4271	-10.1197
Mg_5370	-10.1197
Mg_333	-10.1194
Mg_8139	-10.1188
Mg_4297	-10.1185
Mg_2064	-10.1184
Mg_5843	-10.1168
Mg_5631	-10.116
Mg_5475	-10.1154
Mg_1166	-10.1151
Mg_5613	-10.1143
Mg_832	-10.1116
Mg_479	-10.1108
Mg_5731	-10.1104
Mg_3524	-10.1099
Mg_5856	-10.1093
Mg_1758	-10.1085
Mg_3851	-10.1076
Mg_1902	-10.1074
Mg_2238	-10.1068
Mg_5936	-10.1059
Mg_1910	-10.1057
Mg_5934	-10.1056
Mg_1168	-10.1049
Mg_4926	-10.1045
Mg_5882	-10.1031
Mg_5286	-10.1027
Mg_5233	-10.1023
Mg_4577	-10.1021
Mg_1167	-10.1016
Mg_5044	-10.1008
Mg_6109	-10.1006
Mg_5166	-10.1004
Mg_6424	-10.0997
Mg_4456	-10.0997
Mg_4790	-10.0993
Mg_4523	-10.0989
Mg_1691	-10.0987
Mg_3014	-10.0984
Mg_5208	-10.0983
Mg_8593	-10.0982
Mg_3560	-10.0974
Mg_4451	-10.0973
Mg_8612	-10.0961
Mg_4281	-10.0958
Mg_4728	-10.0953
Mg_3216	-10.0951
Mg_1948	-10.0948
Mg_4549	-10.0945
Mg_2139	-10.0942
Mg_3179	-10.0942
Mg_1704	-10.0941
Mg_1723	-10.0937
Mg_5975	-10.0937
Mg_1786	-10.0928
Mg_8580	-10.0924
Mg_5839	-10.0917
Mg_5031	-10.0913
Mg_4315	-10.0912
Mg_4993	-10.089
Mg_4693	-10.089
Mg_306	-10.0882
Mg_3518	-10.088
Mg_5042	-10.0873
Mg_1915	-10.0872
Mg_4236	-10.0872
Mg_4789	-10.0863
Mg_8349	-10.0853
Mg_3867	-10.0853
Mg_5170	-10.0853
Mg_5653	-10.0851
Mg_268	-10.0849
Mg_4571	-10.084
Mg_2022	-10.0839
Mg_2443	-10.082
Mg_1637	-10.0819
Mg_1982	-10.0811
Mg_5046	-10.0801
Mg_7735	-10.08
Mg_5194	-10.0798
Mg_528	-10.0784
Mg_4291	-10.0772
Mg_1599	-10.0771
Mg_5693	-10.0768
Mg_3565	-10.0767
Mg_4927	-10.0766
Mg_1935	-10.0756
Mg_3218	-10.0755
Mg_6074	-10.0749
Mg_8557	-10.0745
Mg_7864	-10.0741
Mg_3807	-10.0718
Mg_1182	-10.0717
Mg_549	-10.0713
Mg_1828	-10.0707
Mg_2058	-10.0702
Mg_4616	-10.0702
Mg_1923	-10.07
Mg_1163	-10.0699
Mg_5858	-10.0698
Mg_4617	-10.0694
Mg_4580	-10.0688
Mg_5058	-10.0688
Mg_1785	-10.0684
Mg_4226	-10.0681
Mg_7182	-10.068
Mg_4008	-10.0667
Mg_1735	-10.0663
Mg_2337	-10.0654
Mg_1130	-10.0653
Mg_5702	-10.0653
Mg_4179	-10.0652
Mg_4444	-10.0651
Mg_5652	-10.065
Mg_4827	-10.0645
Mg_1825	-10.0643
Mg_5195	-10.0637
Mg_8136	-10.0636
Mg_3934	-10.0627
Mg_4514	-10.0626
Mg_3220	-10.0621
Mg_1710	-10.0621
Mg_3210	-10.0603
Mg_5449	-10.0584
Mg_3311	-10.0582
Mg_2054	-10.0563
Mg_5624	-10.0549
Mg_5182	-10.0548
Mg_8381	-10.0548
Mg_4075	-10.0545
Mg_880	-10.0545
Mg_5932	-10.0543
Mg_798	-10.0534
Mg_335	-10.0531
Mg_4715	-10.0527
Mg_5909	-10.0521
Mg_5644	-10.0513
Mg_5235	-10.051
Mg_3162	-10.0508
Mg_8334	-10.0491
Mg_5231	-10.049
Mg_4015	-10.0481
Mg_1316	-10.0473
Mg_8668	-10.0466
Mg_4000	-10.0463
Mg_5870	-10.046
Mg_2378	-10.0456
Mg_4627	-10.0453
Mg_3945	-10.0438
Mg_5745	-10.0433
Mg_756	-10.0431
Mg_4578	-10.0429
Mg_4522	-10.041
Mg_4458	-10.0409
Mg_529	-10.0403
Mg_5411	-10.0382
Mg_1728	-10.0377
Mg_5220	-10.0377
Mg_5384	-10.0369
Mg_3964	-10.0363
Mg_1107	-10.0358
Mg_4070	-10.0338
Mg_1906	-10.0335
Mg_4829	-10.0332
Mg_7101	-10.0314
Mg_2365	-10.031
Mg_4736	-10.0305
Mg_4416	-10.0303
Mg_1102	-10.0302
Mg_8644	-10.03
Mg_2015	-10.0289
Mg_6121	-10.0284
Mg_5516	-10.0283
Mg_1318	-10.0275
Mg_2014	-10.0267
Mg_4803	-10.0265
Mg_3936	-10.0263
Mg_8154	-10.0261
Mg_8583	-10.0258
Mg_4618	-10.0253
Mg_3577	-10.0252
Mg_3563	-10.0248
Mg_2228	-10.0245
Mg_2071	-10.0243
Mg_5423	-10.0243
Mg_1319	-10.0226
Mg_1874	-10.0226
Mg_6590	-10.0223
Mg_2002	-10.0205
Mg_5922	-10.0201
Mg_6737	-10.0195
Mg_6573	-10.0188
Mg_5828	-10.0188
Mg_4762	-10.0187
Mg_1969	-10.0167
Mg_4419	-10.0167
Mg_228	-10.0159
Mg_5192	-10.015
Mg_7183	-10.0149
Mg_4750	-10.0142
Mg_3585	-10.014
Mg_1089	-10.014
Mg_478	-10.0139
Mg_4209	-10.0133
Mg_878	-10.0131
Mg_4777	-10.0128
Mg_488	-10.012
Mg_4550	-10.0116
Mg_5158	-10.0111
Mg_5880	-10.0106
Mg_8562	-10.0098
Mg_2381	-10.0093
Mg_5691	-10.0085
Mg_323	-10.0063
Mg_8648	-10.0063
Mg_4828	-10.0063
Mg_5923	-10.006
Mg_5743	-10.0057
Mg_4532	-10.0054
Mg_6351	-10.0053
Mg_2472	-10.0052
Mg_8165	-10.0049
Mg_4476	-10.0047
Mg_381	-10.0043
Mg_5896	-10.0038
Mg_5033	-10.0038
Mg_5627	-10.0028
Mg_1913	-10.0026
Mg_8303	-10.0026
Mg_5884	-10.001
Mg_3574	-10.0001
Mg_4188	-9.99944
Mg_4979	-9.9994
Mg_8569	-9.99935
Mg_4420	-9.99898
Mg_5382	-9.9989
Mg_780	-9.9981
Mg_4224	-9.99686
Mg_1099	-9.99648
Mg_5055	-9.99539
Mg_4110	-9.99404
Mg_2236	-9.99275
Mg_4684	-9.99244
Mg_1917	-9.99201
Mg_1862	-9.99091
Mg_4816	-9.99085
Mg_4775	-9.99084
Mg_5017	-9.99063
Mg_6073	-9.9904
Mg_8059	-9.98989
Mg_8482	-9.98972
Mg_3024	-9.98965
Mg_8331	-9.98954
Mg_5029	-9.98953
Mg_527	-9.9878
Mg_4595	-9.9877
Mg_3485	-9.98734
Mg_1386	-9.98716
Mg_1974	-9.98582
Mg_4812	-9.98524
Mg_4938	-9.98507
Mg_3257	-9.98438
Mg_5515	-9.98339
Mg_2444	-9.98311
Mg_4184	-9.98286
Mg_4099	-9.98213
Mg_8695	-9.98181
Mg_8254	-9.98171
Mg_3164	-9.98096
Mg_7736	-9.9807
Mg_1976	-9.98054
Mg_7738	-9.98006
Mg_643	-9.97941
Mg_1809	-9.97928
Mg_6560	-9.97921
Mg_1160	-9.97907
Mg_842	-9.97872
Mg_5380	-9.97863
Mg_8089	-9.97862
Mg_4734	-9.97738
Mg_4738	-9.97663
Mg_8617	-9.97657
Mg_113	-9.97507
Mg_1905	-9.97497
Mg_2336	-9.97416
Mg_5168	-9.97173
Mg_475	-9.97146
Mg_4448	-9.97123
Mg_1881	-9.97111
Mg_349	-9.97063
Mg_1075	-9.97033
Mg_5138	-9.96959
Mg_8640	-9.96938
Mg_321	-9.96866
Mg_537	-9.96846
Mg_6605	-9.96807
Mg_8545	-9.96803
Mg_4910	-9.96761
Mg_6565	-9.96726
Mg_342	-9.96693
Mg_357	-9.96665
Mg_1324	-9.96664
Mg_4543	-9.96641
Mg_4773	-9.96577
Mg_507	-9.96576
Mg_1882	-9.96518
Mg_2051	-9.96399
Mg_8080	-9.96335
Mg_3242	-9.96317
Mg_209	-9.9622
Mg_1708	-9.96172
Mg_4501	-9.9607
Mg_8688	-9.9606
Mg_5841	-9.96044
Mg_4187	-9.96038
Mg_5154	-9.96036
Mg_5830	-9.96036
Mg_8082	-9.9598
Mg_4530	-9.95875
Mg_498	-9.95859
Mg_4579	-9.95852
Mg_795	-9.95826
Mg_3833	-9.95707
Mg_1747	-9.95705
Mg_1789	-9.95685
Mg_1959	-9.9563
Mg_1858	-9.95599
Mg_5369	-9.95571
Mg_4625	-9.95511
Mg_6698	-9.95482
Mg_830	-9.95438
Mg_3166	-9.95375
Mg_595	-9.95287
Mg_4455	-9.95273
Mg_1145	-9.95247
Mg_3868	-9.95198
Mg_4619	-9.95146
Mg_3232	-9.94928
Mg_6576	-9.94926
Mg_2006	-9.94886
Mg_2481	-9.94833
Mg_1625	-9.94823
Mg_3309	-9.94793
Mg_5628	-9.94696
Mg_1683	-9.94689
Mg_3931	-9.94614
Mg_8623	-9.9456
Mg_5609	-9.94555
Mg_2039	-9.94515
Mg_314	-9.94485
Mg_3177	-9.94462
Mg_189	-9.94453
Mg_5473	-9.94451
Mg_4238	-9.94193
Mg_4614	-9.94124
Mg_4009	-9.941
Mg_4043	-9.94095
Mg_7889	-9.94062
Mg_4700	-9.94062
Mg_1983	-9.9401
Mg_1907	-9.93878
Mg_1770	-9.93836
Mg_5218	-9.93772
Mg_3055	-9.93766
Mg_5398	-9.93756
Mg_8058	-9.93706
Mg_8700	-9.93704
Mg_4477	-9.9365
Mg_3246	-9.93626
Mg_6552	-9.93408
Mg_5626	-9.93359
Mg_4219	-9.93314
Mg_4205	-9.93313
Mg_515	-9.93268
Mg_7979	-9.93267
Mg_2038	-9.93241
Mg_1072	-9.93123
Mg_3494	-9.93103
Mg_8365	-9.9307
Mg_4977	-9.93007
Mg_4196	-9.92991
Mg_1675	-9.92916
Mg_3178	-9.92764
Mg_4620	-9.92691
Mg_1389	-9.92672
Mg_754	-9.92608
Mg_784	-9.92548
Mg_7175	-9.9253
Mg_8087	-9.92495
Mg_4561	-9.92494
Mg_5425	-9.92409
Mg_6197	-9.92405
Mg_325	-9.92401
Mg_8090	-9.92268
Mg_5273	-9.92235
Mg_1122	-9.92228
Mg_6840	-9.92217
Mg_1643	-9.92209
Mg_8705	-9.92193
Mg_4540	-9.92174
Mg_8330	-9.92171
Mg_7174	-9.92101
Mg_8485	-9.92097
Mg_5371	-9.92071
Mg_5910	-9.91877
Mg_5611	-9.91776
Mg_3666	-9.91764
Mg_5270	-9.91761
Mg_840	-9.91698
Mg_4504	-9.91676
Mg_6705	-9.91662
Mg_1703	-9.91536
Mg_331	-9.91517
Mg_4596	-9.91486
Mg_8108	-9.91455
Mg_4624	-9.9142
Mg_5600	-9.91365
Mg_1199	-9.91304
Mg_4712	-9.91298
Mg_3864	-9.91297
Mg_1811	-9.91292
Mg_1646	-9.91179
Mg_1103	-9.91132
Mg_3307	-9.91131
Mg_6584	-9.91074
Mg_4563	-9.90982
Mg_8552	-9.9094
Mg_1700	-9.90913
Mg_3496	-9.90912
Mg_4764	-9.9088
Mg_5919	-9.90853
Mg_1321	-9.90793
Mg_7386	-9.90777
Mg_4968	-9.90653
Mg_535	-9.90613
Mg_352	-9.90537
Mg_8567	-9.90529
Mg_4917	-9.9052
Mg_5962	-9.90418
Mg_1861	-9.90417
Mg_2067	-9.90334
Mg_5283	-9.90261
Mg_4529	-9.90253
Mg_4814	-9.90251
Mg_5272	-9.90202
Mg_5947	-9.9015
Mg_2197	-9.9005
Mg_56	-9.90004
Mg_1945	-9.89949
Mg_8088	-9.89933
Mg_6504	-9.89924
Mg_3963	-9.89892
Mg_2028	-9.89824
Mg_3498	-9.8979
Mg_769	-9.89736
Mg_8271	-9.89671
Mg_5906	-9.89623
Mg_1682	-9.8959
Mg_7241	-9.89571
Mg_4032	-9.89547
Mg_1385	-9.89544
Mg_1493	-9.89489
Mg_4955	-9.89486
Mg_1489	-9.89403
Mg_4981	-9.89361
Mg_8649	-9.89324
Mg_4941	-9.89316
Mg_1803	-9.89276
Mg_3714	-9.89208
Mg_5939	-9.89186
Mg_8450	-9.8915
Mg_8323	-9.89032
Mg_545	-9.89015
Mg_4916	-9.89004
Mg_1688	-9.88792
Mg_132	-9.8873
Mg_4592	-9.88713
Mg_5826	-9.88706
Mg_5460	-9.88705
Mg_4680	-9.88693
Mg_4017	-9.88659
Mg_3468	-9.88623
Mg_4542	-9.88468
Mg_1926	-9.88376
Mg_818	-9.88369
Mg_4610	-9.88296
Mg_1780	-9.88264
Mg_495	-9.88233
Mg_3190	-9.88196
Mg_5274	-9.88188
Mg_8658	-9.88172
Mg_1798	-9.88139
Mg_4606	-9.88131
Mg_6593	-9.88125
Mg_1190	-9.88098
Mg_2080	-9.88091
Mg_844	-9.88065
Mg_4042	-9.87865
Mg_6708	-9.87742
Mg_3899	-9.8771
Mg_7733	-9.87613
Mg_8448	-9.87594
Mg_807	-9.87543
Mg_1574	-9.87488
Mg_4724	-9.87487
Mg_867	-9.87447
Mg_7919	-9.874
Mg_4402	-9.87397
Mg_8459	-9.87123
Mg_2391	-9.87081
Mg_7089	-9.8705
Mg_5397	-9.87044
Mg_7459	-9.86956
Mg_5222	-9.86911
Mg_1705	-9.86852
Mg_2404	-9.8668
Mg_5706	-9.86607
Mg_4605	-9.86549
Mg_3244	-9.86467
Mg_1665	-9.86433
Mg_5650	-9.86392
Mg_3169	-9.86384
Mg_525	-9.86273
Mg_265	-9.86185
Mg_3582	-9.86163
Mg_8052	-9.86045
Mg_4505	-9.85999
Mg_4749	-9.85987
Mg_6572	-9.85905
Mg_4696	-9.8573
Mg_6447	-9.85723
Mg_8606	-9.85668
Mg_4445	-9.85544
Mg_505	-9.85444
Mg_1712	-9.85442
Mg_1464	-9.85428
Mg_3713	-9.85394
Mg_3900	-9.85384
Mg_5462	-9.85375
Mg_3875	-9.85268
Mg_7712	-9.8513
Mg_1079	-9.85068
Mg_4802	-9.85062
Mg_3542	-9.85025
Mg_5259	-9.84962
Mg_8156	-9.84943
Mg_5666	-9.84943
Mg_1876	-9.84876
Mg_5252	-9.84779
Mg_277	-9.84751
Mg_3236	-9.8475
Mg_3034	-9.84618
Mg_5960	-9.84538
Mg_5689	-9.84487
Mg_847	-9.84482
Mg_6528	-9.8445
Mg_641	-9.84337
Mg_5024	-9.84283
Mg_4511	-9.84247
Mg_4503	-9.84187
Mg_1737	-9.84184
Mg_3804	-9.84062
Mg_1916	-9.84035
Mg_5719	-9.83998
Mg_4502	-9.83992
Mg_8468	-9.83973
Mg_1797	-9.83958
Mg_1750	-9.83951
Mg_3952	-9.8393
Mg_2040	-9.83922
Mg_5261	-9.83894
Mg_4443	-9.8385
Mg_4047	-9.83836
Mg_8509	-9.83784
Mg_2065	-9.83666
Mg_5678	-9.83659
Mg_362	-9.83514
Mg_1733	-9.83452
Mg_1980	-9.83379
Mg_5596	-9.83362
Mg_4953	-9.83357
Mg_4483	-9.83312
Mg_6337	-9.83309
Mg_4088	-9.83307
Mg_1934	-9.83284
Mg_8348	-9.83272
Mg_4545	-9.83247
Mg_8274	-9.8323
Mg_4526	-9.83159
Mg_307	-9.83082
Mg_5010	-9.83077
Mg_4107	-9.83075
Mg_5205	-9.83003
Mg_5421	-9.82917
Mg_7760	-9.82882
Mg_4565	-9.82804
Mg_1492	-9.82733
Mg_1884	-9.826
Mg_1153	-9.82593
Mg_8063	-9.82489
Mg_7728	-9.82434
Mg_8010	-9.82385
Mg_3541	-9.82379
Mg_7709	-9.82361
Mg_300	-9.82279
Mg_6895	-9.82265
Mg_4130	-9.82186
Mg_6597	-9.82176
Mg_4495	-9.82176
Mg_5512	-9.82113
Mg_4586	-9.82087
Mg_257	-9.82071
Mg_1659	-9.8206
Mg_1320	-9.81884
Mg_4264	-9.81828
Mg_4598	-9.81826
Mg_782	-9.81794
Mg_318	-9.81712
Mg_1179	-9.81689
Mg_1773	-9.81652
Mg_6612	-9.81595
Mg_8683	-9.81546
Mg_1715	-9.8154
Mg_7888	-9.81451
Mg_8171	-9.81447
Mg_5971	-9.81405
Mg_4951	-9.81207
Mg_3717	-9.81191
Mg_1313	-9.81089
Mg_4566	-9.8106
Mg_8329	-9.81042
Mg_5207	-9.80983
Mg_6904	-9.80974
Mg_1933	-9.8096
Mg_8134	-9.80957
Mg_1738	-9.80944
Mg_6014	-9.80845
Mg_8150	-9.80756
Mg_4313	-9.80744
Mg_5961	-9.80693
Mg_4568	-9.80541
Mg_8093	-9.80491
Mg_4547	-9.80476
Mg_4551	-9.80393
Mg_2431	-9.80384
Mg_996	-9.80362
Mg_4559	-9.80288
Mg_3298	-9.80283
Mg_5832	-9.80267
Mg_4010	-9.80263
Mg_5741	-9.80231
Mg_3942	-9.80107
Mg_8283	-9.80096
Mg_2347	-9.80081
Mg_546	-9.80058
Mg_4548	-9.80057
Mg_1193	-9.79974
Mg_6175	-9.79883
Mg_5964	-9.79875
Mg_3255	-9.798
Mg_6726	-9.79787
Mg_4520	-9.79768
Mg_5367	-9.7976
Mg_638	-9.79739
Mg_3911	-9.79711
Mg_8086	-9.79684
Mg_8145	-9.79551
Mg_279	-9.79526
Mg_6802	-9.79457
Mg_274	-9.79422
Mg_259	-9.79412
Mg_5857	-9.79353
Mg_1802	-9.79352
Mg_4065	-9.79254
Mg_7404	-9.79213
Mg_1696	-9.7919
Mg_4786	-9.79163
Mg_5399	-9.78972
Mg_2483	-9.78961
Mg_5062	-9.78954
Mg_4140	-9.78951
Mg_3539	-9.78946
Mg_8605	-9.78891
Mg_4587	-9.78788
Mg_1806	-9.78782
Mg_1931	-9.78642
Mg_1650	-9.78635
Mg_4450	-9.78622
Mg_828	-9.78567
Mg_1727	-9.78538
Mg_1176	-9.78501
Mg_6103	-9.78461
Mg_8060	-9.78399
Mg_8321	-9.78376
Mg_3620	-9.78348
Mg_6138	-9.78284
Mg_2366	-9.78189
Mg_7090	-9.78184
Mg_6187	-9.78176
Mg_1845	-9.78152
Mg_1162	-9.78051
Mg_1894	-9.78044
Mg_4826	-9.78012
Mg_4166	-9.7789
Mg_5009	-9.77875
Mg_367	-9.77857
Mg_1808	-9.77654
Mg_1895	-9.77643
Mg_6796	-9.77619
Mg_7353	-9.77518
Mg_4286	-9.77358
Mg_6996	-9.77291
Mg_1101	-9.77244
Mg_6430	-9.77156
Mg_1928	-9.77128
Mg_1908	-9.77104
Mg_5056	-9.77053
Mg_1777	-9.77014
Mg_856	-9.76979
Mg_4994	-9.76926
Mg_4621	-9.76913
Mg_521	-9.76896
Mg_1198	-9.76894
Mg_7369	-9.76875
Mg_2349	-9.76853
Mg_6429	-9.76716
Mg_7407	-9.76657
Mg_8272	-9.76601
Mg_4253	-9.76595
Mg_1888	-9.76437
Mg_7082	-9.76436
Mg_8327	-9.76434
Mg_4570	-9.76375
Mg_768	-9.76359
Mg_1138	-9.76326
Mg_3053	-9.76314
Mg_4493	-9.76276
Mg_4449	-9.76237
Mg_8009	-9.76236
Mg_5451	-9.76231
Mg_7711	-9.76222
Mg_8148	-9.76128
Mg_8638	-9.76078
Mg_1184	-9.76077
Mg_5447	-9.75912
Mg_6549	-9.75892
Mg_1859	-9.75861
Mg_3941	-9.75756
Mg_5680	-9.75578
Mg_8620	-9.75507
Mg_7757	-9.75477
Mg_1144	-9.75423
Mg_6557	-9.75174
Mg_4248	-9.75134
Mg_1165	-9.75063
Mg_1814	-9.75014
Mg_4447	-9.74925
Mg_1873	-9.74877
Mg_6503	-9.74864
Mg_1194	-9.74851
Mg_7120	-9.74816
Mg_5676	-9.74806
Mg_6490	-9.74767
Mg_3502	-9.74731
Mg_5893	-9.74724
Mg_7460	-9.74648
Mg_8285	-9.7464
Mg_8304	-9.74632
Mg_6415	-9.74628
Mg_8322	-9.74514
Mg_7838	-9.74508
Mg_8456	-9.74466
Mg_5395	-9.74407
Mg_8057	-9.74353
Mg_8310	-9.74299
Mg_590	-9.7424
Mg_4269	-9.74238
Mg_32	-9.74046
Mg_4076	-9.74017
Mg_1132	-9.74015
Mg_8130	-9.73987
Mg_591	-9.7396
Mg_3953	-9.73954
Mg_3897	-9.7394
Mg_3192	-9.73939
Mg_6709	-9.7371
Mg_2013	-9.73651
Mg_8127	-9.73637
Mg_2092	-9.73468
Mg_3674	-9.73455
Mg_3562	-9.73408
Mg_297	-9.73403
Mg_1891	-9.73384
Mg_4558	-9.7326
Mg_8142	-9.73251
Mg_1810	-9.73237
Mg_6061	-9.73156
Mg_5490	-9.73153
Mg_1739	-9.7303
Mg_4484	-9.72989
Mg_3571	-9.72875
Mg_7996	-9.72871
Mg_3808	-9.72854
Mg_8508	-9.72728
Mg_8085	-9.72726
Mg_1080	-9.72708
Mg_4231	-9.72699
Mg_4626	-9.72693
Mg_8314	-9.7256
Mg_6442	-9.7253
Mg_7699	-9.7251
Mg_1147	-9.72427
Mg_8050	-9.72358
Mg_489	-9.72337
Mg_7749	-9.72176
Mg_6243	-9.72056
Mg_5732	-9.72032
Mg_8284	-9.72028
Mg_8126	-9.71946
Mg_1142	-9.71902
Mg_4954	-9.71805
Mg_8312	-9.7175
Mg_8506	-9.71748
Mg_8132	-9.71747
Mg_4181	-9.71702
Mg_4424	-9.71661
Mg_8081	-9.71623
Mg_1635	-9.71563
Mg_8051	-9.71517
Mg_389	-9.71511
Mg_4600	-9.71468
Mg_497	-9.71444
Mg_3471	-9.71418
Mg_4182	-9.71417
Mg_8025	-9.71416
Mg_3568	-9.71398
Mg_278	-9.71371
Mg_5722	-9.71202
Mg_4507	-9.71134
Mg_1135	-9.71074
Mg_3557	-9.71053
Mg_8273	-9.71026
Mg_4761	-9.71007
Mg_7076	-9.70947
Mg_8066	-9.7075
Mg_1949	-9.70741
Mg_4881	-9.70726
Mg_770	-9.70701
Mg_1143	-9.70562
Mg_6585	-9.70526
Mg_4465	-9.70524
Mg_7606	-9.70491
Mg_4553	-9.70468
Mg_1466	-9.70465
Mg_2137	-9.7046
Mg_7081	-9.70456
Mg_8205	-9.70442
Mg_4464	-9.70409
Mg_4825	-9.70298
Mg_5464	-9.70202
Mg_5717	-9.70157
Mg_4751	-9.70116
Mg_7978	-9.70002
Mg_3283	-9.69993
Mg_6416	-9.69959
Mg_3555	-9.69953
Mg_8547	-9.69885
Mg_2192	-9.69795
Mg_2155	-9.69789
Mg_7934	-9.69773
Mg_4539	-9.69744
Mg_7831	-9.69703
Mg_4997	-9.69584
Mg_8160	-9.69499
Mg_4615	-9.69498
Mg_8149	-9.69448
Mg_3475	-9.69287
Mg_1783	-9.69229
Mg_7857	-9.69219
Mg_487	-9.69207
Mg_3889	-9.691
Mg_2842	-9.69094
Mg_4628	-9.69082
Mg_6822	-9.69005
Mg_8135	-9.68995
Mg_6170	-9.68963
Mg_8592	-9.68948
Mg_6695	-9.68884
Mg_5488	-9.68868
Mg_5978	-9.68843
Mg_1256	-9.68772
Mg_8458	-9.68756
Mg_6253	-9.68641
Mg_3558	-9.6862
Mg_1139	-9.68607
Mg_4242	-9.68559
Mg_6834	-9.68557
Mg_2053	-9.68497
Mg_8405	-9.68492
Mg_6903	-9.68291
Mg_4120	-9.68091
Mg_8493	-9.68043
Mg_6604	-9.67987
Mg_6139	-9.67962
Mg_6594	-9.67961
Mg_1787	-9.67885
Mg_516	-9.67866
Mg_1856	-9.67798
Mg_5730	-9.6778
Mg_2390	-9.67764
Mg_3277	-9.67627
Mg_4087	-9.67601
Mg_7840	-9.67576
Mg_1187	-9.67566
Mg_918	-9.67564
Mg_5368	-9.67552
Mg_8163	-9.67484
Mg_539	-9.67479
Mg_5503	-9.67472
Mg_642	-9.67404
Mg_3529	-9.67346
Mg_4302	-9.67294
Mg_3085	-9.67245
Mg_7964	-9.67216
Mg_8118	-9.67205
Mg_276	-9.67197
Mg_7213	-9.66995
Mg_319	-9.66905
Mg_4121	-9.66877
Mg_1684	-9.668
Mg_2364	-9.66787
Mg_1195	-9.66782
Mg_8652	-9.66755
Mg_7822	-9.66743
Mg_4051	-9.66696
Mg_6130	-9.66649
Mg_1779	-9.66634
Mg_6423	-9.66464
Mg_598	-9.66448
Mg_4799	-9.66399
Mg_6746	-9.66399
Mg_6064	-9.66287
Mg_1772	-9.66113
Mg_8054	-9.66066
Mg_7603	-9.66064
Mg_4801	-9.66045
Mg_1146	-9.65874
Mg_6231	-9.65851
Mg_2029	-9.65805
Mg_470	-9.65743
Mg_358	-9.65734
Mg_3482	-9.6568
Mg_6810	-9.65643
Mg_3194	-9.65591
Mg_4710	-9.6552
Mg_1989	-9.65468
Mg_1678	-9.65465
Mg_8155	-9.65408
Mg_3908	-9.65407
Mg_1137	-9.65403
Mg_8071	-9.65347
Mg_6896	-9.65307
Mg_8320	-9.652
Mg_2338	-9.65153
Mg_647	-9.65099
Mg_469	-9.65086
Mg_6890	-9.65055
Mg_1686	-9.64999
Mg_2084	-9.6499
Mg_3561	-9.64908
Mg_4041	-9.64854
Mg_3493	-9.64833
Mg_2913	-9.64788
Mg_1134	-9.64743
Mg_8119	-9.64628
Mg_4869	-9.646
Mg_4634	-9.64576
Mg_1083	-9.6454
Mg_6057	-9.64512
Mg_3233	-9.64418
Mg_1086	-9.64391
Mg_4708	-9.6435
Mg_3281	-9.64305
Mg_3590	-9.64272
Mg_522	-9.64168
Mg_6699	-9.64165
Mg_6402	-9.64123
Mg_5200	-9.64072
Mg_1131	-9.6405
Mg_2081	-9.64029
Mg_876	-9.64025
Mg_4134	-9.63978
Mg_6116	-9.63903
Mg_3538	-9.63887
Mg_3296	-9.63854
Mg_372	-9.63852
Mg_6182	-9.63812
Mg_290	-9.63804
Mg_7841	-9.63778
Mg_4204	-9.63732
Mg_8056	-9.63716
Mg_3670	-9.63667
Mg_6602	-9.63644
Mg_1622	-9.63578
Mg_8079	-9.63559
Mg_4833	-9.6351
Mg_4466	-9.63472
Mg_3901	-9.63446
Mg_3578	-9.63389
Mg_499	-9.63321
Mg_3276	-9.63277
Mg_3259	-9.63256
Mg_7168	-9.63215
Mg_4562	-9.632
Mg_3912	-9.63096
Mg_3229	-9.63069
Mg_7598	-9.63068
Mg_8168	-9.63002
Mg_5240	-9.62987
Mg_1936	-9.62955
Mg_6989	-9.62897
Mg_1681	-9.62891
Mg_4508	-9.62669
Mg_7720	-9.62665
Mg_5183	-9.62592
Mg_854	-9.62563
Mg_287	-9.62556
Mg_1085	-9.62508
Mg_1775	-9.62493
Mg_8114	-9.62484
Mg_3910	-9.62433
Mg_8326	-9.62412
Mg_7744	-9.62354
Mg_6258	-9.62307
Mg_7200	-9.62231
Mg_4030	-9.62211
Mg_3812	-9.62191
Mg_8690	-9.62143
Mg_4029	-9.62142
Mg_7725	-9.62111
Mg_6915	-9.62106
Mg_5063	-9.62093
Mg_7555	-9.62068
Mg_1098	-9.61953
Mg_8581	-9.61771
Mg_3537	-9.61761
Mg_8280	-9.61727
Mg_3316	-9.61597
Mg_4888	-9.61544
Mg_6192	-9.61542
Mg_4472	-9.61542
Mg_8164	-9.61525
Mg_6828	-9.61488
Mg_1174	-9.61483
Mg_2318	-9.61368
Mg_5742	-9.61304
Mg_4875	-9.61211
Mg_4509	-9.61189
Mg_3579	-9.61165
Mg_5012	-9.6116
Mg_1497	-9.61125
Mg_4215	-9.61089
Mg_4601	-9.61088
Mg_4567	-9.61033
Mg_1648	-9.61015
Mg_7762	-9.60995
Mg_5663	-9.6093
Mg_8109	-9.60907
Mg_5579	-9.60826
Mg_1123	-9.60741
Mg_3476	-9.60736
Mg_4608	-9.6073
Mg_4971	-9.60717
Mg_3920	-9.60651
Mg_1092	-9.60517
Mg_4064	-9.605
Mg_5958	-9.60473
Mg_1805	-9.60449
Mg_4932	-9.60294
Mg_4884	-9.60288
Mg_4174	-9.60235
Mg_4895	-9.60231
Mg_1022	-9.60184
Mg_4025	-9.60181
Mg_3553	-9.60172
Mg_4293	-9.60141
Mg_4924	-9.60136
Mg_1140	-9.60122
Mg_6569	-9.60103
Mg_4473	-9.60103
Mg_7556	-9.60099
Mg_6571	-9.6
Mg_359	-9.59883
Mg_1697	-9.59843
Mg_2362	-9.5984
Mg_4489	-9.59818
Mg_4760	-9.59802
Mg_1660	-9.5978
Mg_4197	-9.59698
Mg_1957	-9.59547
Mg_4189	-9.59547
Mg_7719	-9.5953
Mg_8596	-9.59515
Mg_8616	-9.59498
Mg_4201	-9.59463
Mg_6029	-9.59375
Mg_8111	-9.59355
Mg_4026	-9.59348
Mg_7701	-9.59055
Mg_8685	-9.58892
Mg_1024	-9.58862
Mg_2334	-9.58854
Mg_3184	-9.58831
[truncated: 29,894 more rows]

## Sheet: ML_Prediction_DLPNO_validation
files	ml_BE_eV	ccsdt_BE_eV	MSE
Mg_3225	-9.47541	-10.2904	0.664147
Mg_1046	-8.07158	-7.58655	0.235262
Mg_4023	-11.6244	-12.0824	0.209772
Mg_7301	-6.7056	-6.26459	0.194491
Mg_5916	-7.87691	-8.24118	0.132691
Mg_3089	-8.81812	-9.102	0.0805891
Mg_4921	-8.78762	-8.51186	0.0760411
Mg_4252	-10.1632	-10.0073	0.0243089
Mg_1148	-10.512	-10.6337	0.0148221
Mg_6415	-9.74628	-9.62995	0.013532
Mg_0931	-7.83739	-7.85415	0.000280726
Mg_5066	-8.54564	-8.53696	7.53185e-05
Ca_8471	-6.35346	-7.12631	0.597291
Ca_3679	-6.40035	-6.86692	0.217692
Ca_5415	-6.95787	-7.30643	0.121488
Ca_1474	-5.31188	-4.9647	0.12054
Ca_7357	-6.32562	-6.60174	0.0762455
Ca_8535	-6.37312	-6.17155	0.0406311
Ca_6383	-7.76602	-7.93987	0.030224
Ca_2303	-4.26905	-4.41395	0.0209965
Ca_3004	-5.17272	-5.29456	0.0148434
Ca_8769	-3.91603	-3.8279	0.00776639
Ca_1337	-7.20556	-7.12013	0.00729877
Ca_6853	-4.5008	-4.55652	0.00310469
Sr_2408	-4.86931	-5.37029	0.250981
Sr_6762	-4.80751	-4.32315	0.234613
Sr_7333	-4.56613	-5.03027	0.215428
Sr_2048	-6.61556	-7.07071	0.207163
Sr_3458	-3.77583	-4.20768	0.186501
Sr_5862	-5.37165	-4.96739	0.163427
Sr_1148	-5.99074	-6.39158	0.160675
Sr_2726	-4.07555	-4.45686	0.145402
Sr_6744	-4.57082	-4.41569	0.0240672
Sr_3741	-3.76022	-3.88887	0.0165495
Sr_4345	-3.41866	-3.49582	0.00595284
Sr_0942	-4.05899	-4.0928	0.00114293
Ba_4984	-4.74241	-5.58007	0.701673
Ba_5987	-3.66979	-4.21114	0.293059
Ba_6334	-4.56562	-5.06724	0.251618
Ba_8047	-6.14381	-6.57037	0.181951
Ba_3971	-4.57666	-4.99686	0.176568
Ba_6304	-3.79956	-4.00003	0.0401881
Ba_3418	-2.77702	-2.94079	0.0268205
Ba_7218	-3.55619	-3.70067	0.0208746
Ba_6679	-3.15453	-3.2754	0.0146103
Ba_1781	-4.83764	-4.77519	0.00389961
Ba_7141	-3.42875	-3.47895	0.00251951
Ba_1754	-5.03876	-5.03912	1.31007e-07
